# Supplementary material
Source: PubMed Central journal article supplement (PMC6697184)
Supplement: NIHMS1044065-supplement-1.pdf [file NIHMS1044065-supplement-1.pdf]

# SUPPLEMENTARY INFORMATION

This appendix includes 16 Figures, 14 Tables, Supplementary Materials and Methods and Supplementary References.

## 1. SUPPLEMENTARY FIGURES

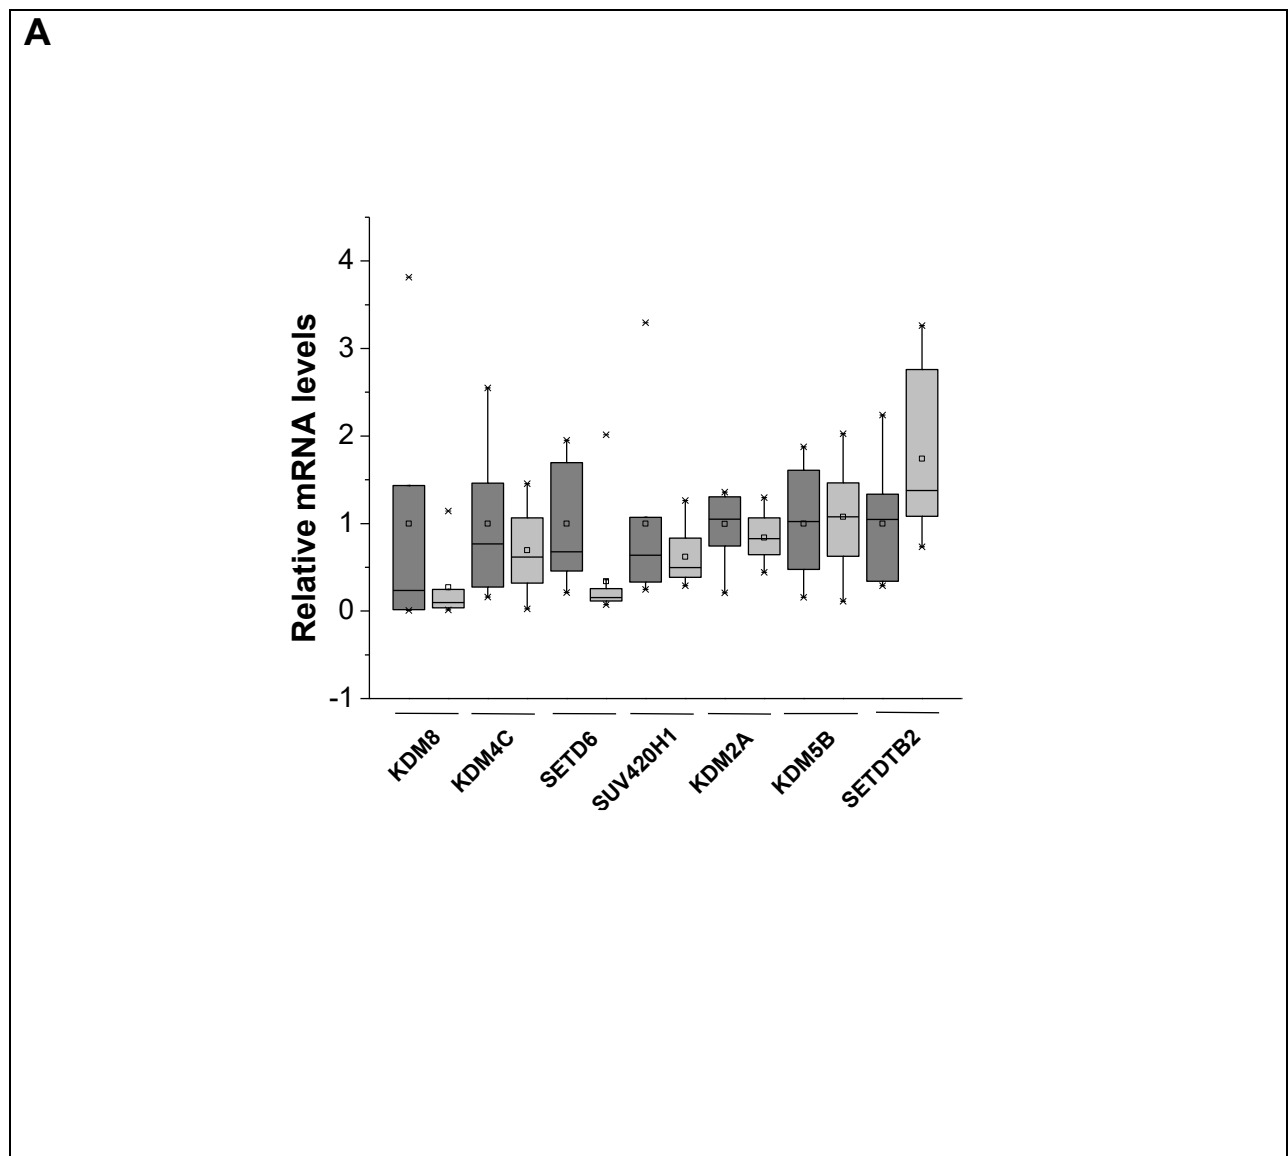

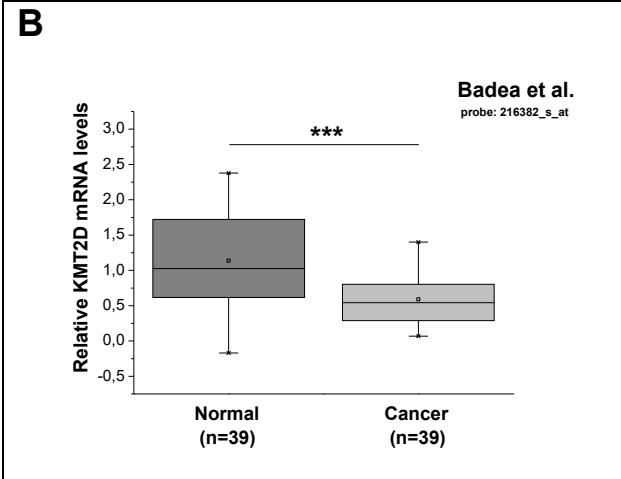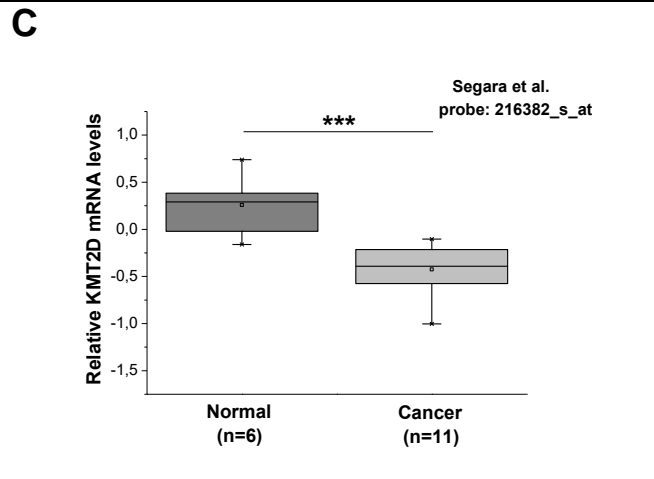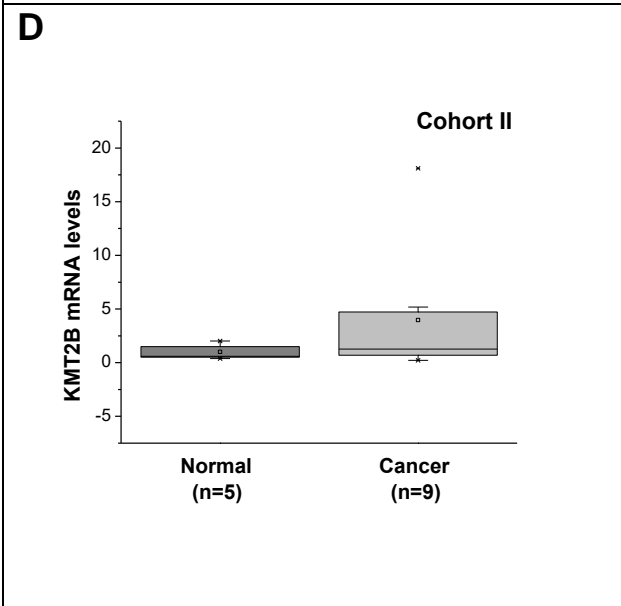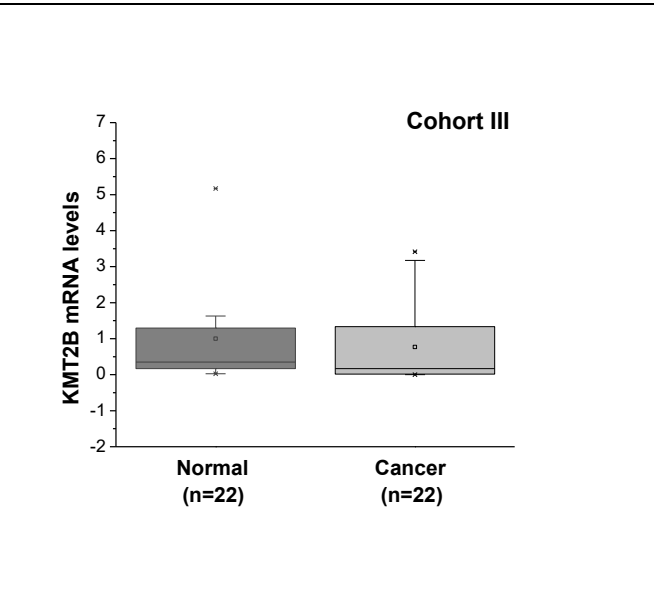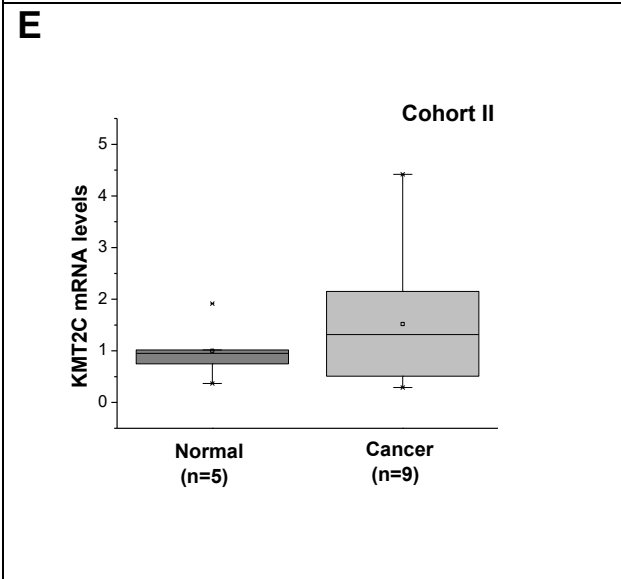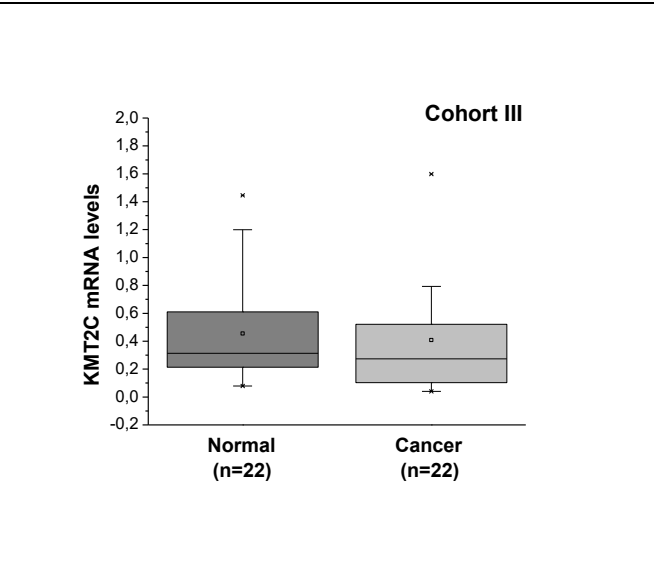

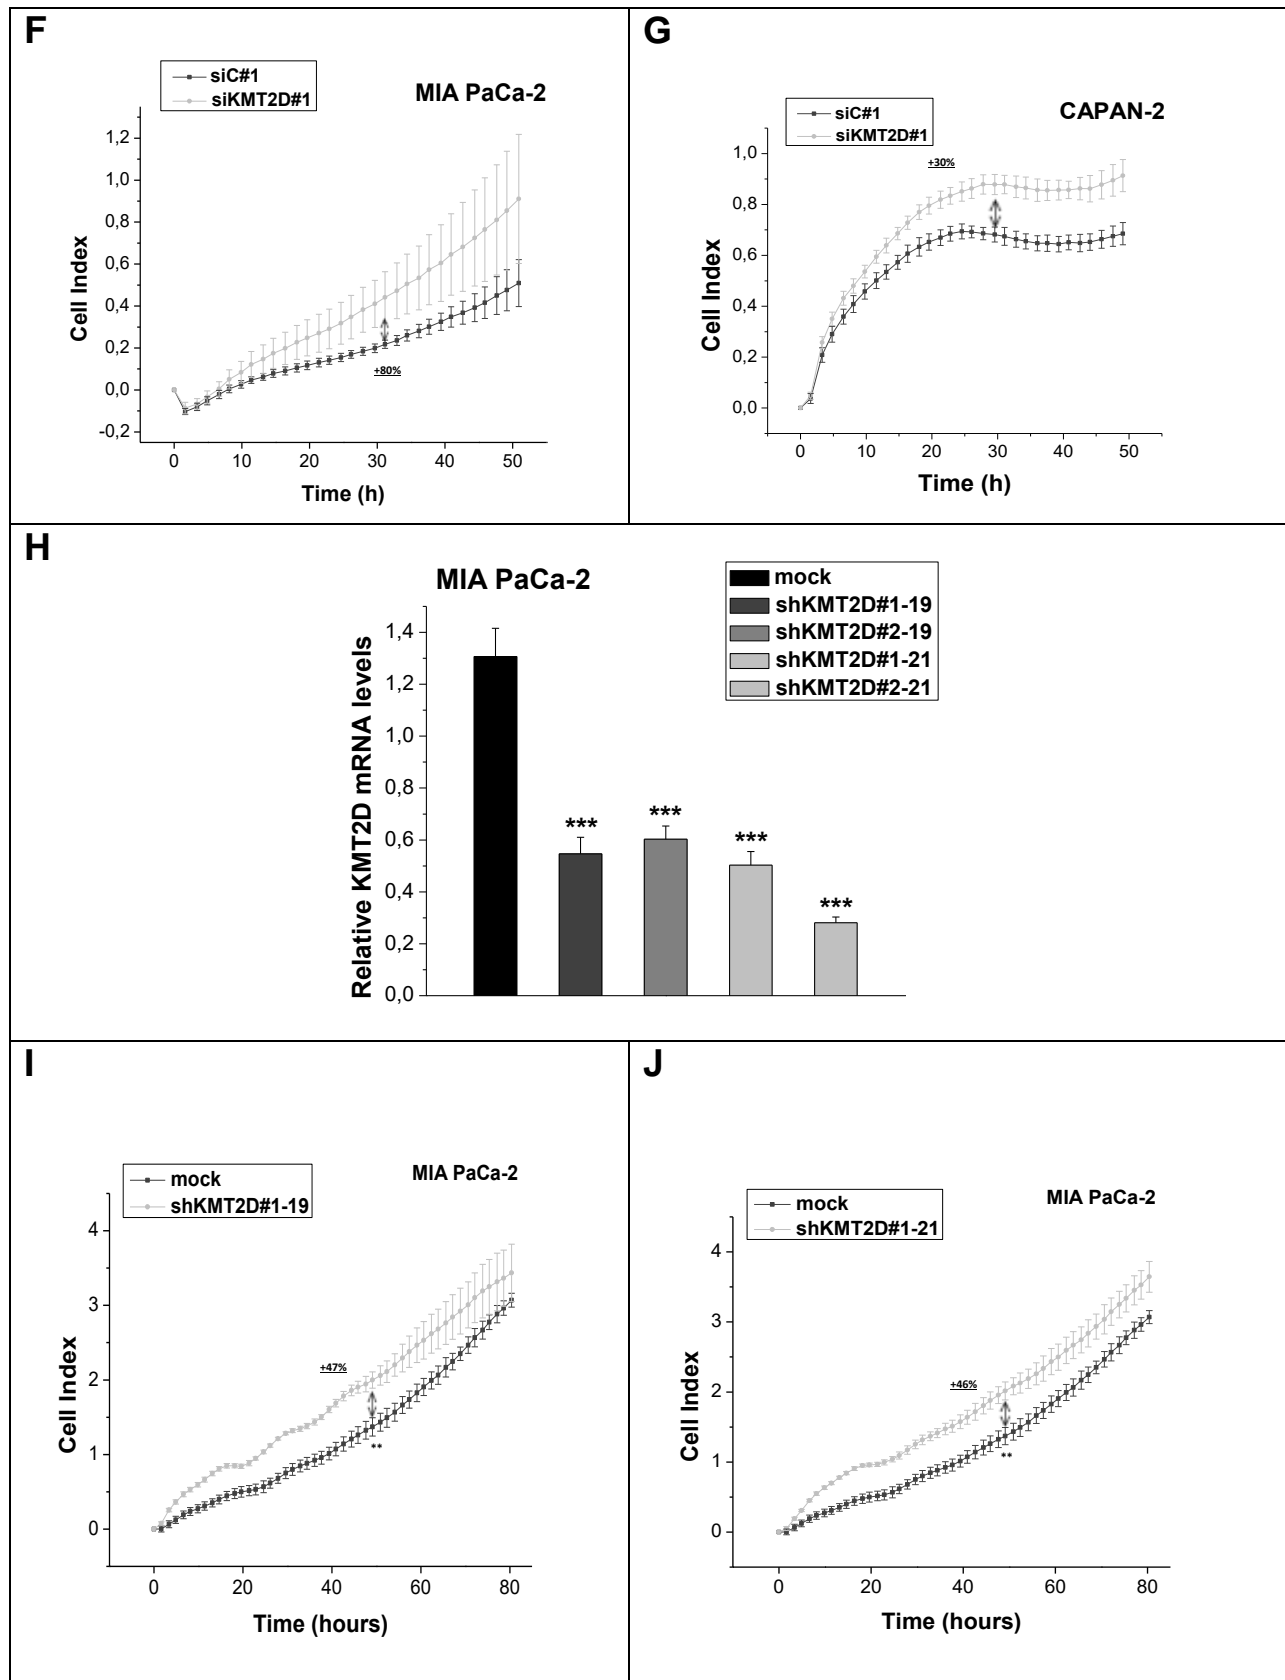

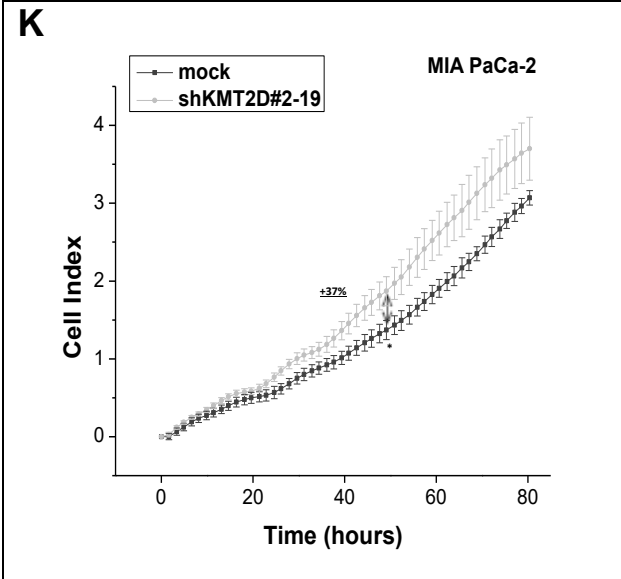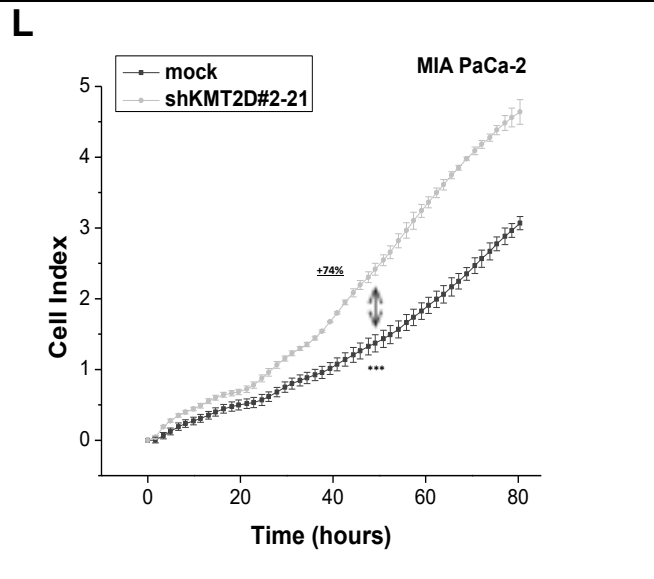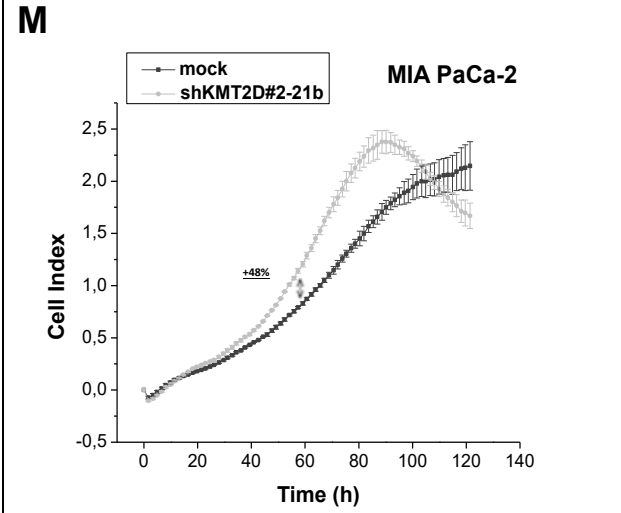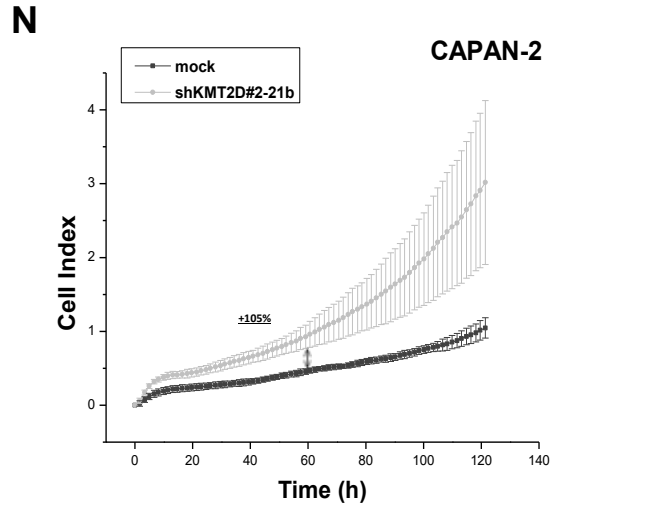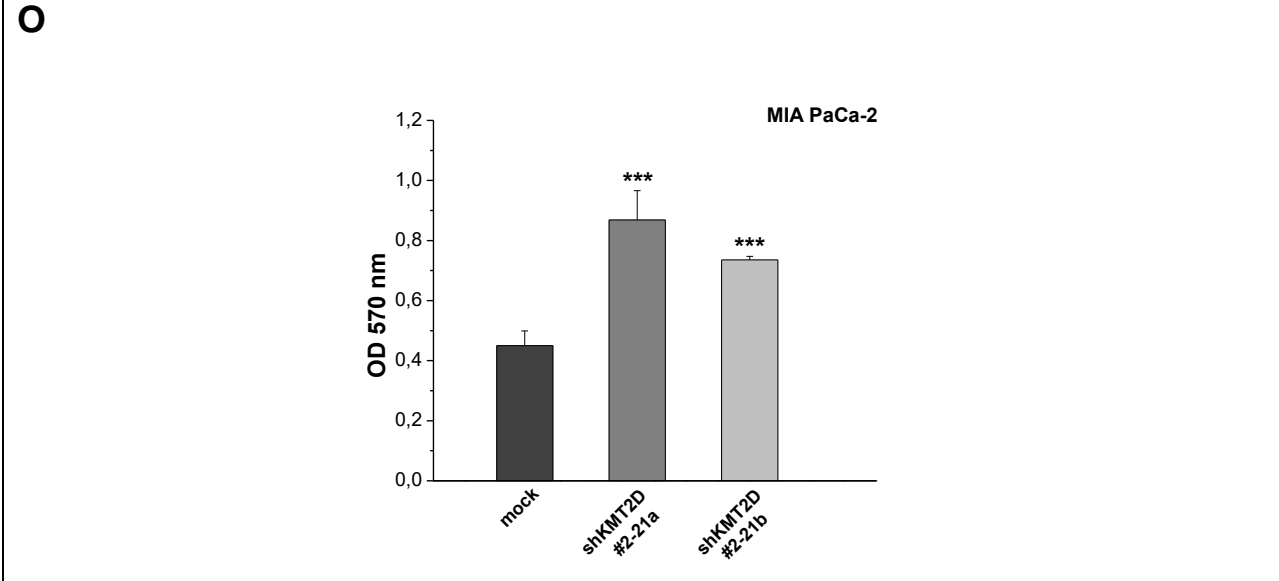

**P**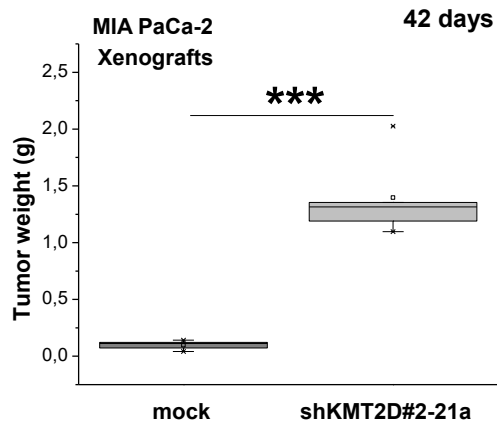**Q**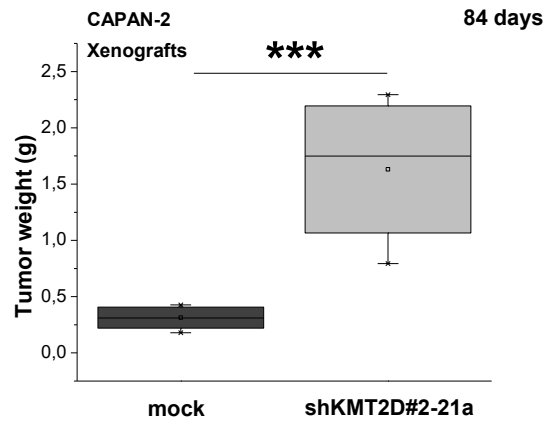**R**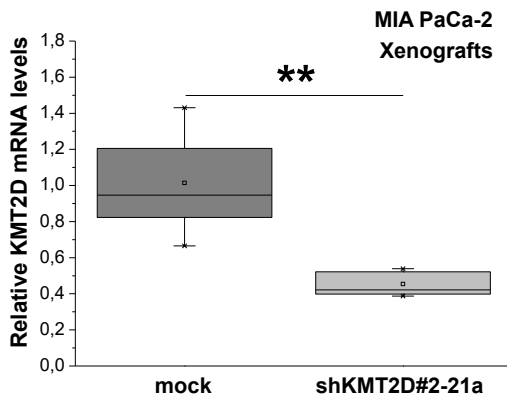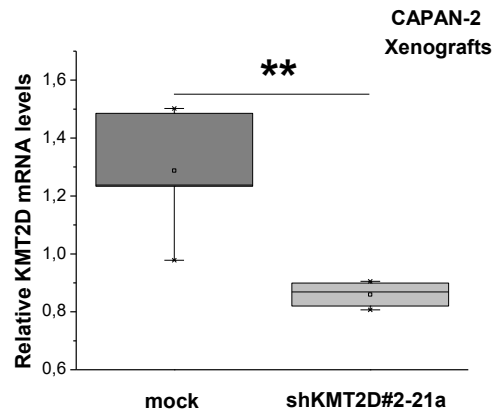**S**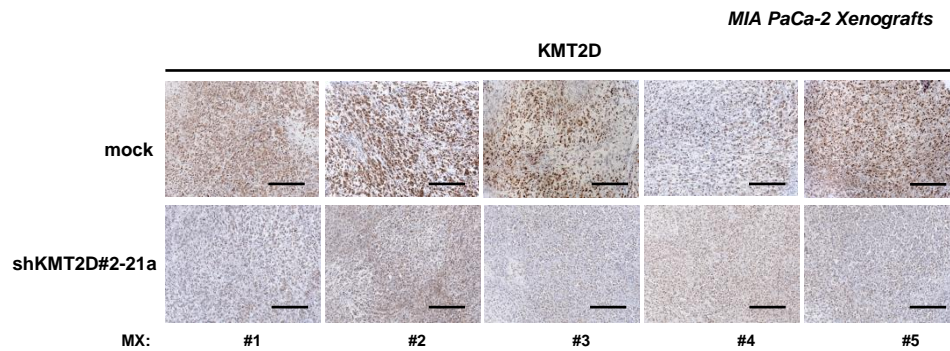

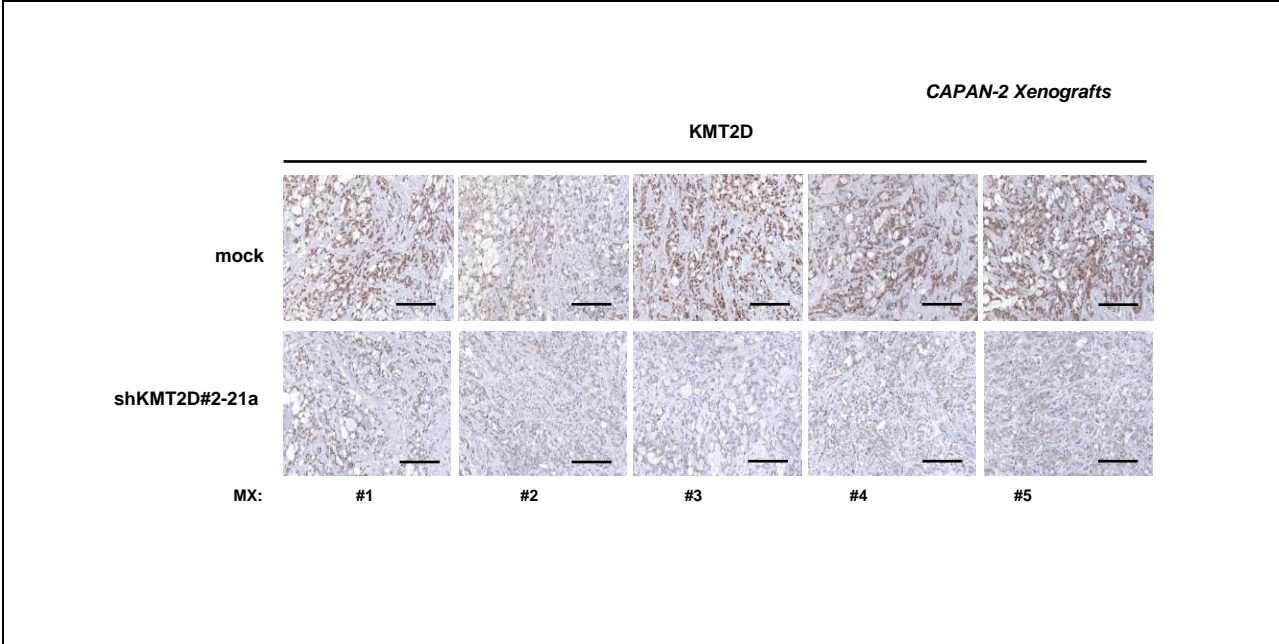

**T**

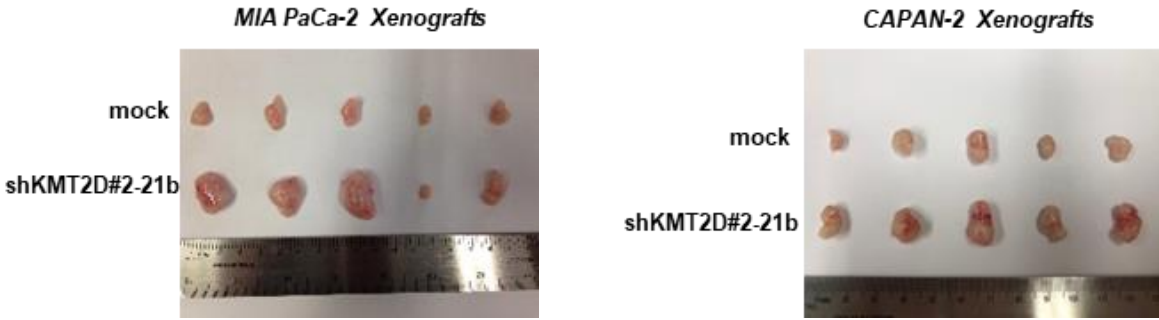

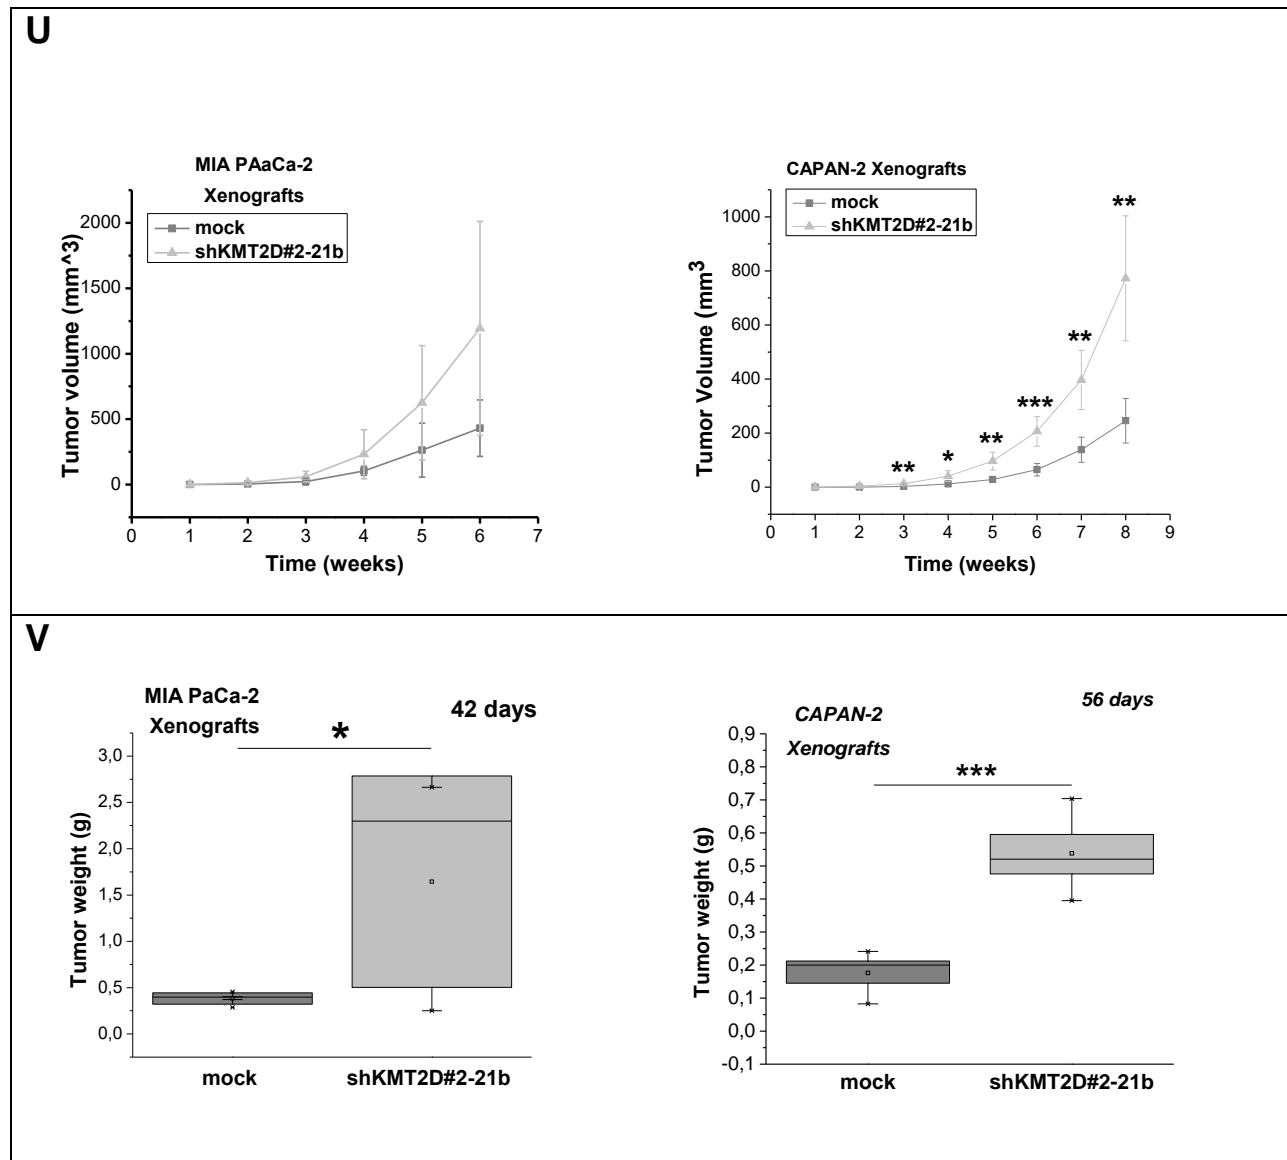

**Supplementary Figure S1. Histone methyltransferase KMT2D acts as a tumor suppressor in pancreatic cancer.**

**(A)** Differential expression of chromatin regulators including *KDM8*, *KDM4C*, *SETD6*, *SUV420H1*, *KDM2A*, *KDM5B* and *SETDB2* in pancreatic carcinoma versus normal tissues originating from Cohort II, as assessed by RT-qPCR. **(B, C)** Differential expression of *Lysine (K)-Specific Methyltransferase 2D (KMT2D)* in pancreatic

carcinoma versus normal tissues, based on 2 studies listed in Oncomine database [1 2]. **(D, E)** Relative mRNA levels of KMT2B and KMT2C in Cohorts II and III, as assessed by RT-qPCR. **(F, G)** Effect of transient *KMT2D* suppression by using siKMT2D#1 and the respective scramble control on pancreatic cancer cell proliferation, as assessed by the xCELLigence system. **(H)** Efficiency of *KMT2D* stable depletion by using 4 different shRNAs in MIA PaCa-2 cells, as assessed by RT-qPCR. **(I-L)** Effect of stable *KMT2D* suppression by using 4 different shRNAs on pancreatic cancer cell proliferation, as assessed by the xCELLigence system. **(M, N)** Assessment of the proliferative capacity of shKMT2D#2-21b clonal cell lines versus mock transfected cells. **(O)** Quantification of the colonies formed by shKMT2D#2-21 a and b clonal cell lines versus mock transfected cells. **(P, Q)** Tumor weight graphs of xenografts bearing KMT2D stably suppressed MIA PaCa-2 and CAPAN-2 cells (5 mice/group). *KMT2D* expression in MIA PaCa-2 and CAPAN-2 xenografts from mice injected with mock or shKMT2D#2-21a cells, as assessed by RT-qPCR **(R)** and IHC analysis **(S)**. **(T)** Representative images of the excised tumors and **(U)** tumor volume (mm<sup>3</sup>) **(V)** and tumor weight graphs of xenografts from mice injected with mock or shKMT2D#2-21b cells. For establishing shKMT2D#2-21b xenografts, 3.5\*10<sup>6</sup> MIA PaCa-2 and 4.5\*10<sup>6</sup> CAPAN-2 cells were injected subcutaneously in the right flank of NOD-SCID mice (5 mice/group). siC#1, cells transfected with a negative control scramble siRNA; siKMT2D#1, cells transfected with siRNA#1 for KMT2D; mock, cells transfected with shRNA empty vector; shKMT2D#1-19, cells transfected with #1-19 shRNA for KMT2D; shKMT2D#1-21, cells transfected with #1-21 shRNA for KMT2D; shKMT2D#2-19, cells transfected with #2-19 shRNA for KMT2D; shKMT2D#2-21, cells transfected with #2-21 shRNA for KMT2D;



shKMT2D#2-21a or b, cells transfected with #2-21 shRNA for KMT2D that underwent clonal selection resulting in clones a and b; MX, Mouse Xenograft. Statistical analyses were performed using one-way ANOVA. Asterisks denote statistically significant differences, \*  $P < .05$ , \*\*  $P < .01$ , \*\*\*  $P < .001$

**A**

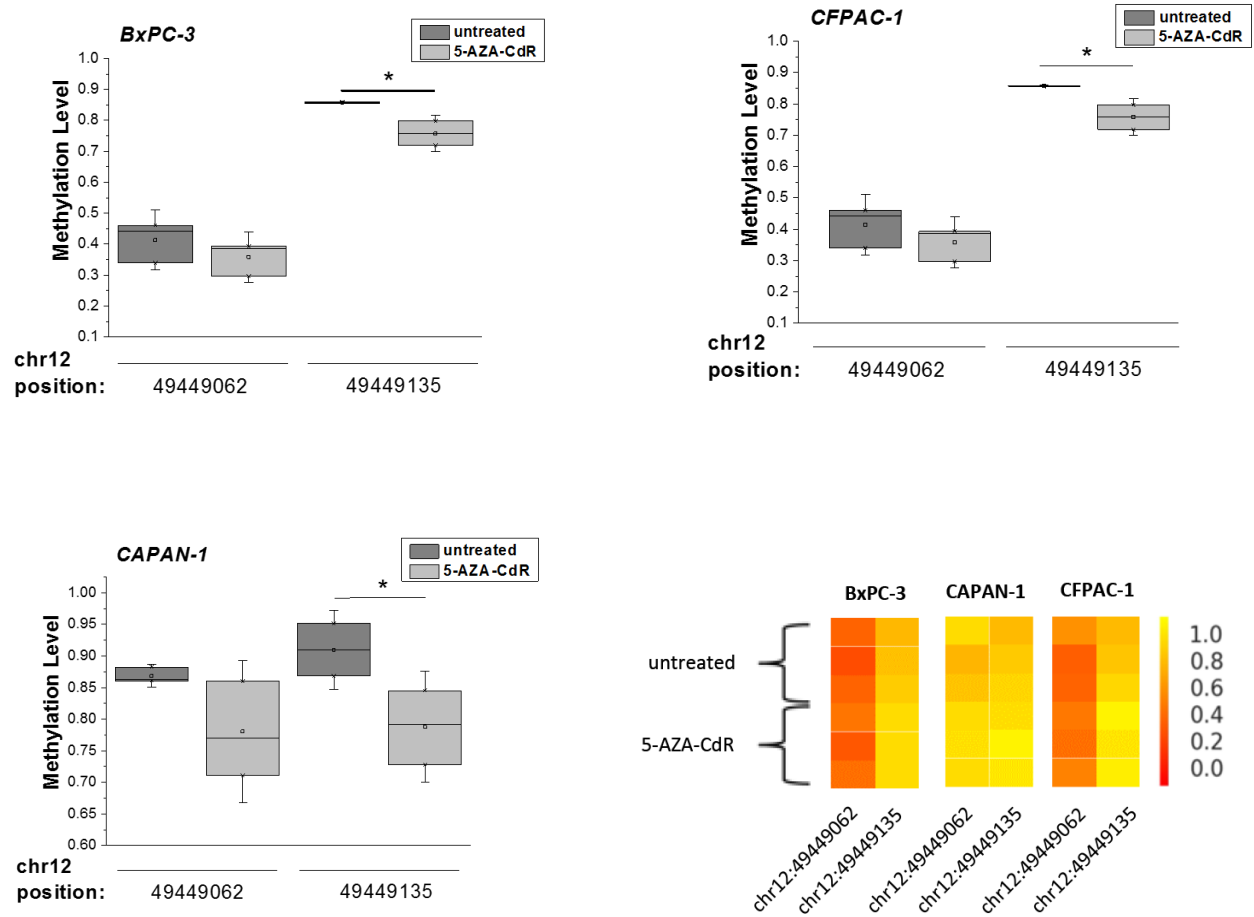

**B**

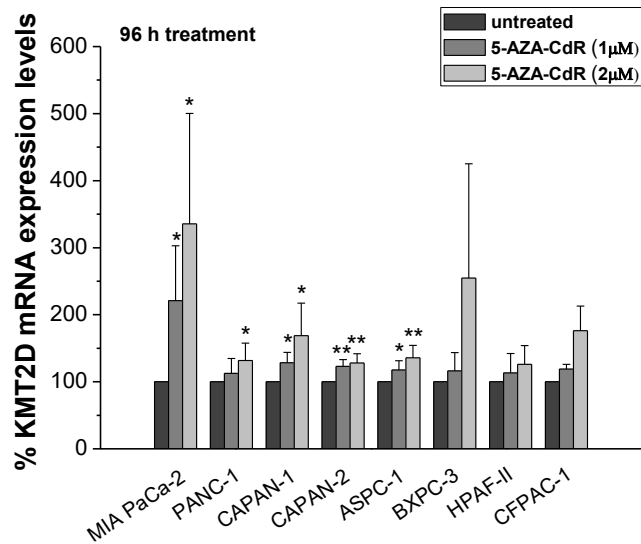

**Supplementary Figure S2. Epigenetic regulation of KMT2D levels through DNA methylation of 2 CpG sites.**

**(A)** CpG methylation validation via Targeted Bisulfite Sequencing for the selected region of interest (ROI) (chr12: 49448986-49449286). Quantitative methylation measurements at the single-CpG-site level for untreated or 5-AZA-2'-deoxycytidine (5-AZA-CdR)-treated BxPC-3, CAPAN-1 and CFPAC-1 cells are box plotted or depicted as heatmaps of the methylation ratio. The color indicates the level of methylation from higher to lower in yellow > orange > red order. **(B)** Dose response evaluation of 5-AZA-CdR treatment for 96 h of KMT2D mRNA levels, as assessed by RT-qPCR. Statistical analyses were performed using one-way ANOVA. Asterisks denote statistically significant differences, \*  $P < .05$ , \*\*  $P < .01$

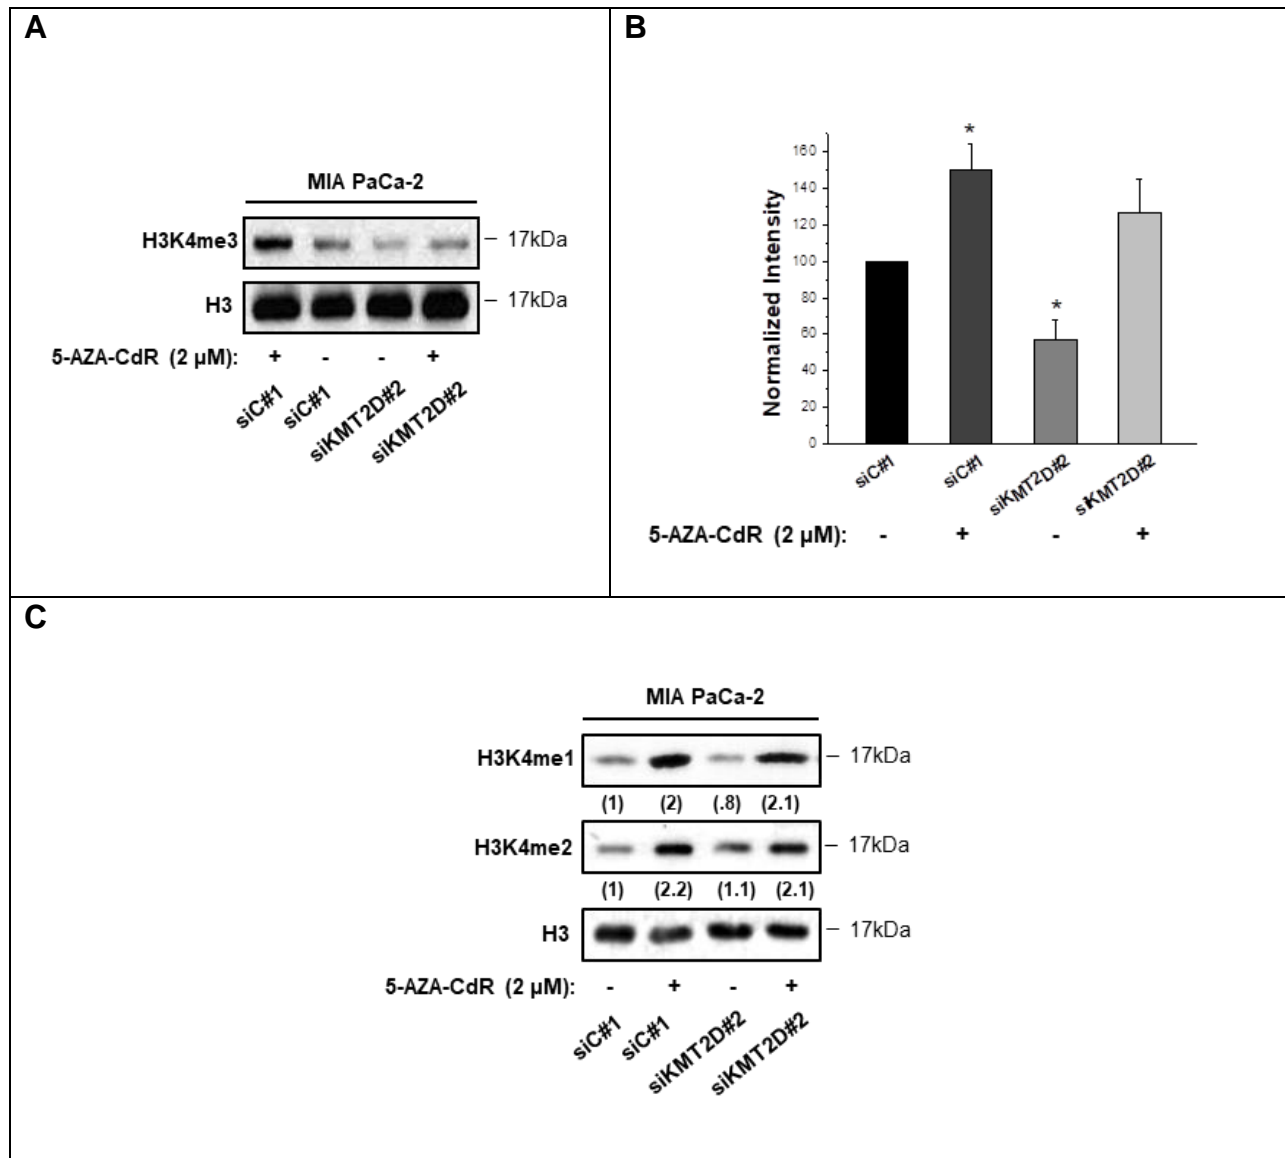

**Supplementary Figure S3. Assessment of the global H3K4me3 levels of control or *KMT2D*-silenced cells upon 5-AZA-CdR treatment.**

Effect of 5-AZA-CdR treatment for 48 h on the tri-methylated form of histone H3 at lysine 4 (H3K4me3) levels in control or *KMT2D*-silenced cells, as assessed by **(A)** Immunoblot (IB) analyses and **(B)** the quantification of the respective immunoreactive bands of 2 independent experiments. Statistical analyses were performed using one-

way ANOVA. Asterisk denotes statistically significant differences, \*  $P < .05$ . **(C)** Numbers in parentheses denote the average-fold change of the ratio H3K4me1:CREB total protein (upper lane) and H3K4me2:CREB (lower lane) of 5-AZA-CdR-treated cells versus non-treated cells (set as default 1). siKMT2D#2, cells transfected with siRNA#2 for KMT2D.

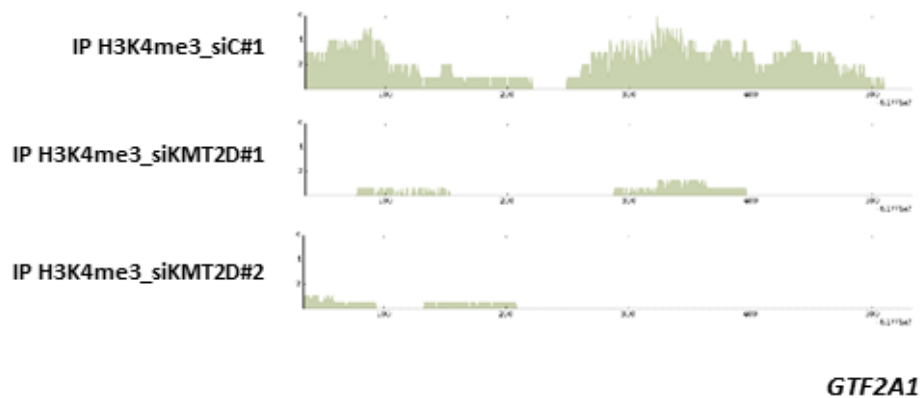

**Supplementary Figure S4. ChIP-seq signals of H3K4me3 in *KMT2D*-silenced cells.**

Effects of KMT2D silencing measured by Chromatin Immunoprecipitation-Sequencing (ChIP-seq) on H3K4me3 occupancy of the *General Transcription Factor IIA Subunit 1* (*GTF2A1*) genomic region. The enrichment values were tested with the Mann-Whitney U test ( $P < .001$ ).

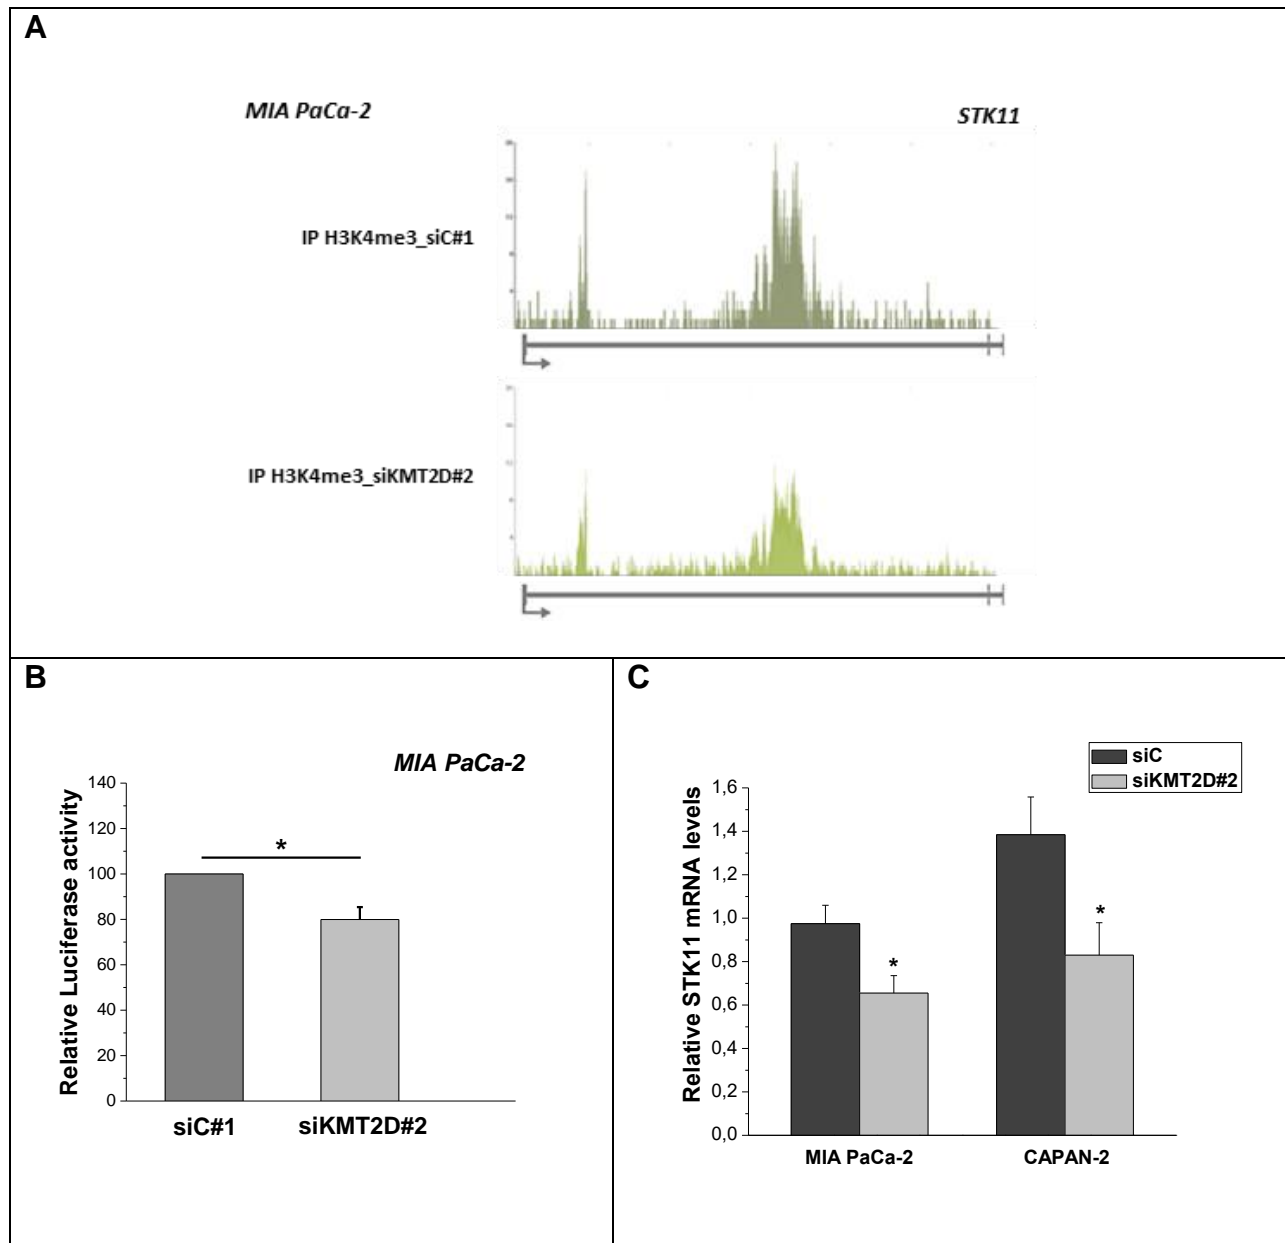

**Supplementary Figure S5. Evaluation of *STK11* as a direct *KMT2D* transcriptional target.**

**(A)** Profiles of H3K4me3 ChIP-seq peaks at the *Serine/Threonine Kinase 11* (*STK11*) locus upon *KMT2D* suppression. The x-axes indicate the genomic region. The y-axes represent the fold enrichment of H3K4me3 peaks compared with 2% input control. The

enrichment values were tested with the Mann-Whitney U test ( $P < .001$ ). **(B)** Luciferase activity mediated by *STK11* promoter upon KMT2D silencing was evaluated 28 h after transfection of the STK11\_pLightSwitch\_Prom Reporter or pLenti CMV Puro LUC vectors in MIA PaCa-2 cells. **(C)** *STK11* mRNA levels in pancreatic cancer cell lines transiently-silenced of KMT2D, as assessed by RT-qPCR. Statistical analyses were performed using one-way ANOVA. Asterisk denotes statistically significant differences, \*  $P < .05$

**A**

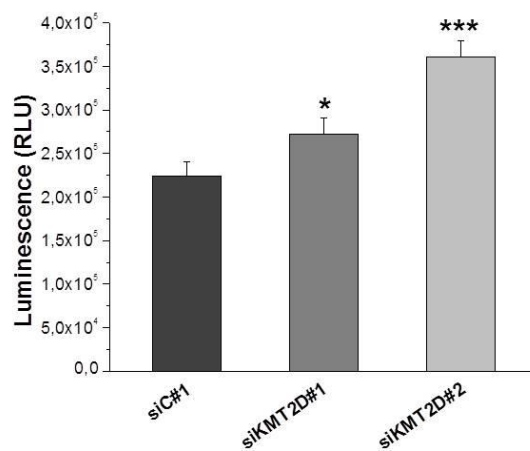

# B

MIA PaCA-2

CAPAN-2

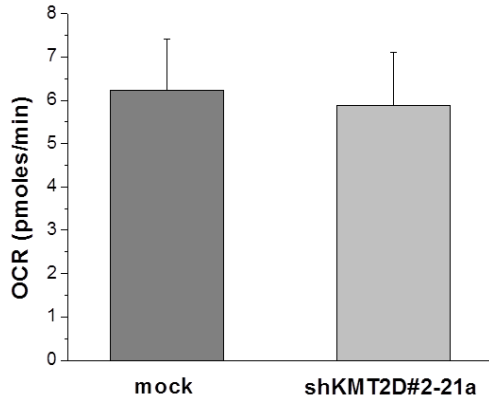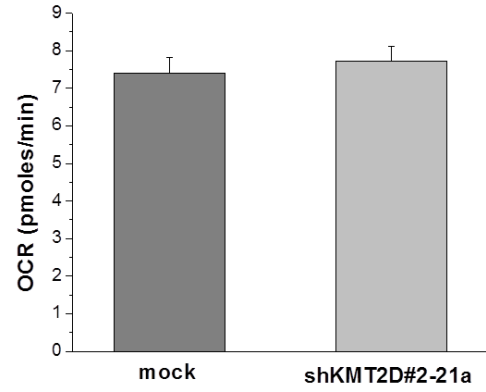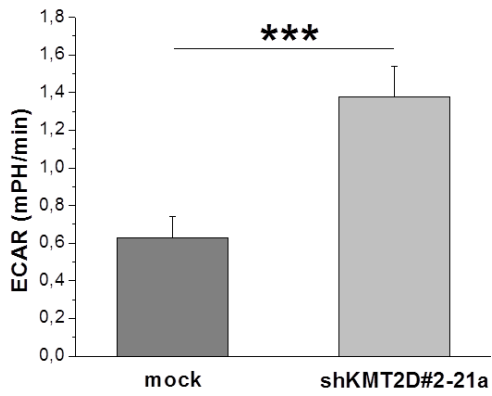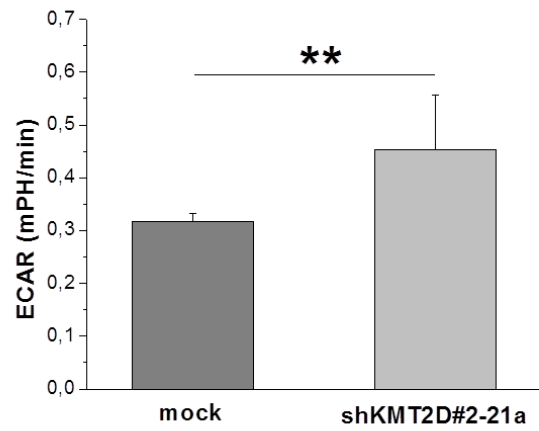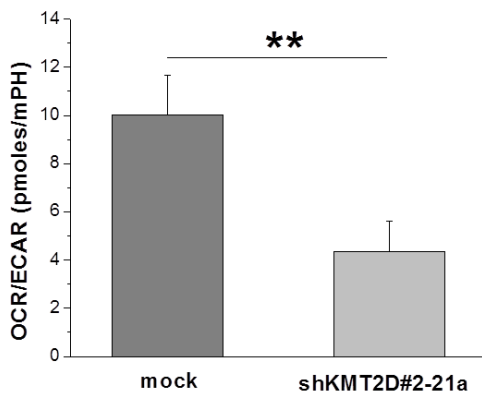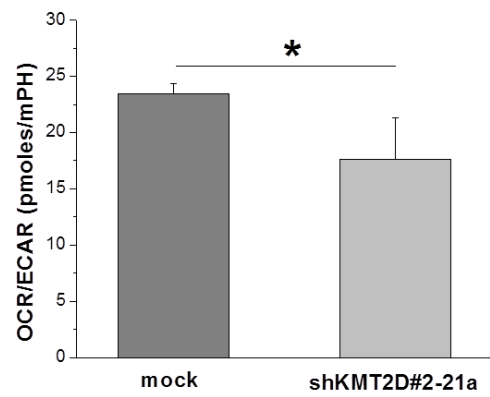

**C**

**MIA PaCA-2**

**CAPAN-2**

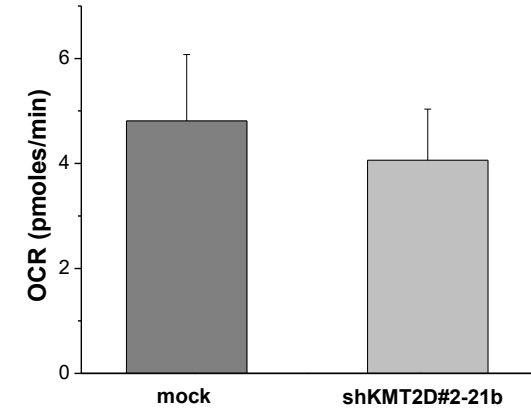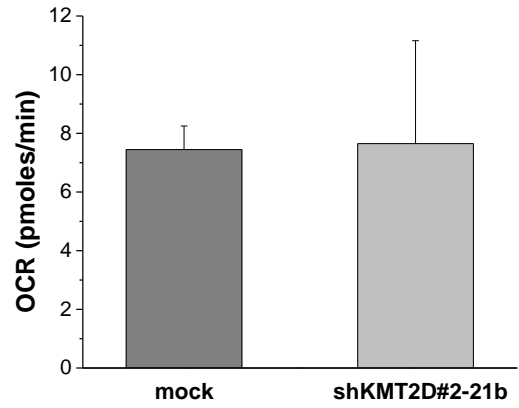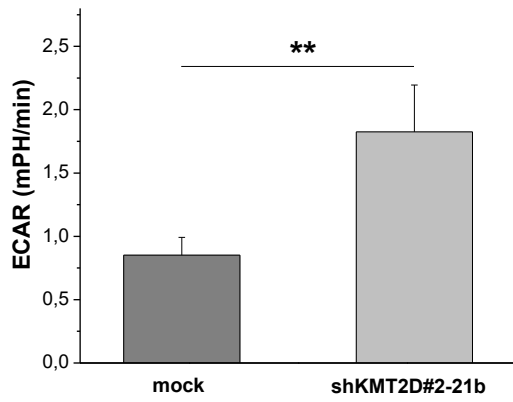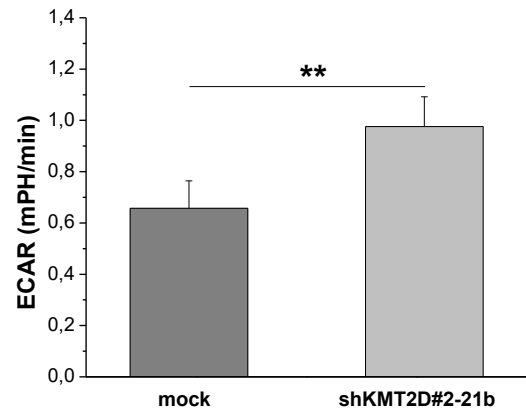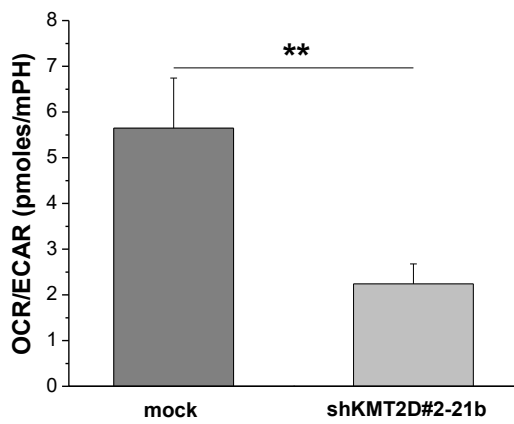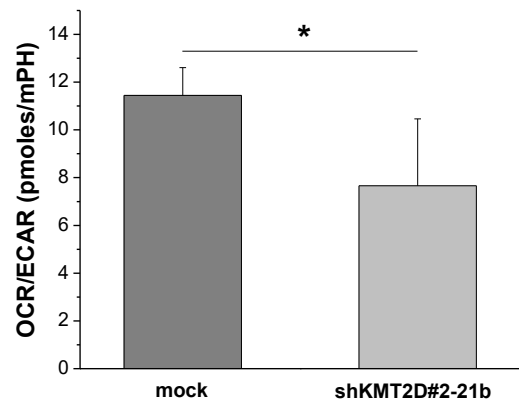



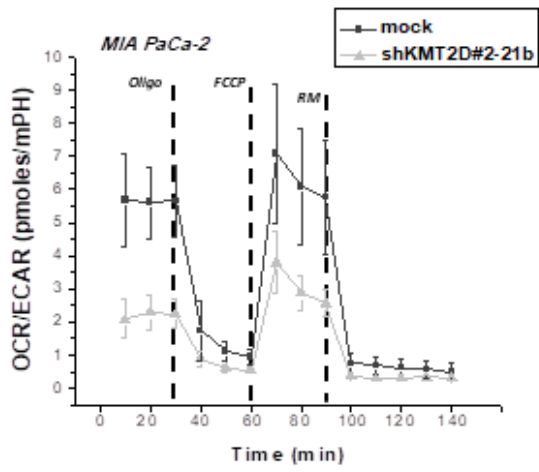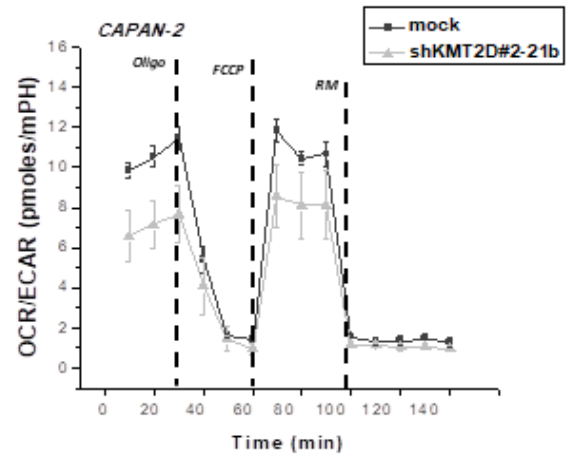

**D**

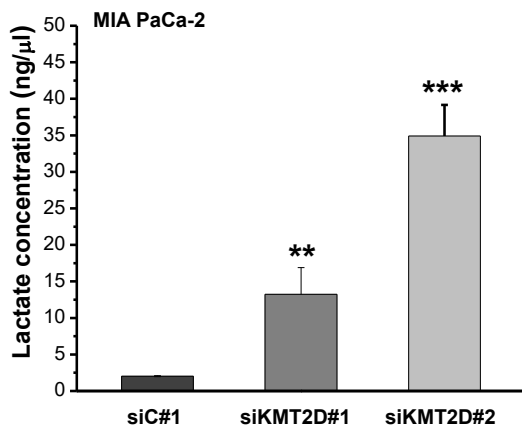

**E**

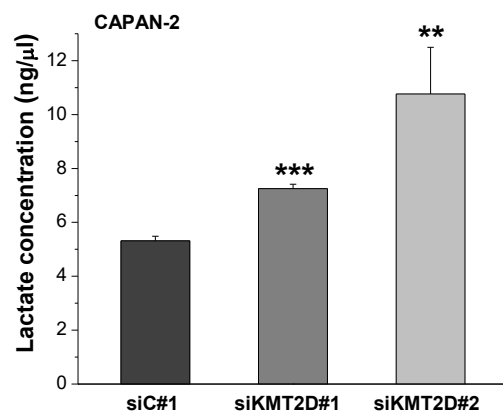

**F**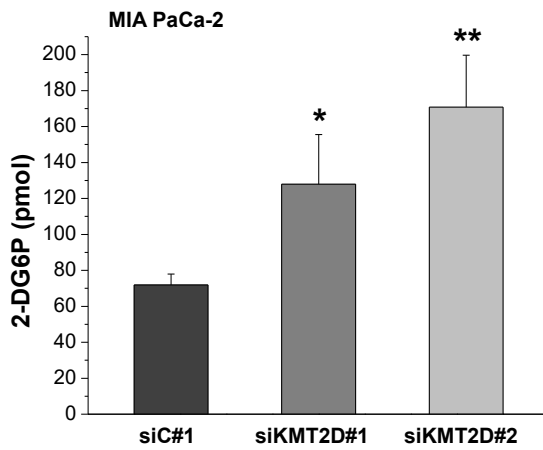**G**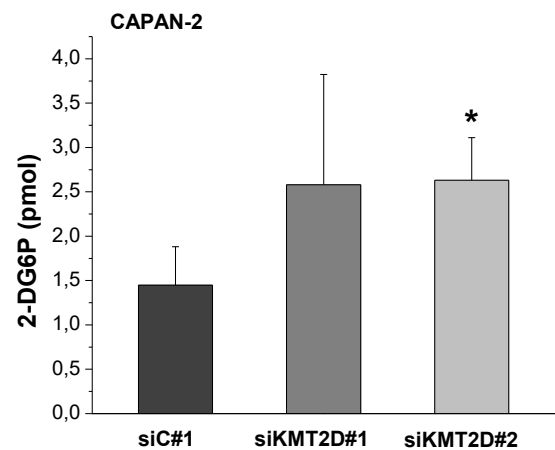

**Supplementary Figure S6. KMT2D histone methyltransferase regulates pancreatic cancer cell metabolism.**

**(A)** Endogenous nicotinamide adenine dinucleotide phosphate (NADPH) levels of MIA PaCa-2 cells pretreated with scramble siRNA or 2 different siRNAs against KMT2D, as assessed by the NADP/NADPH-Glo™ bioluminescent Assay. **(B-C)** Effects of *KMT2D* suppression, by using 2 different shKMT2D-stably transfected populations for each cell line on pancreatic cancer cells' bioenergetic profile, as assessed by the XF24-3 Analyzer. Effects of *KMT2D* silencing, by using 2 different siRNAs in **(D and E)** lactate production and **(F and G)** glucose uptake. Average basal OCR and ECAR were further normalized per protein for KMT2D stably-depleted cells. OCR, Oxygen Consumption Rate; ECAR, Extracellular Acidification Rate; 2-DG6P, the 2-deoxyglucose (2-DG) glucose analogue phosphorylated by hexokinase to 2-DG6P. Statistical analyses were performed using one-way ANOVA. Asterisks denote statistically significant differences, \*  $P < .05$ , \*\*  $P < .01$ , \*\*\*  $P < .001$

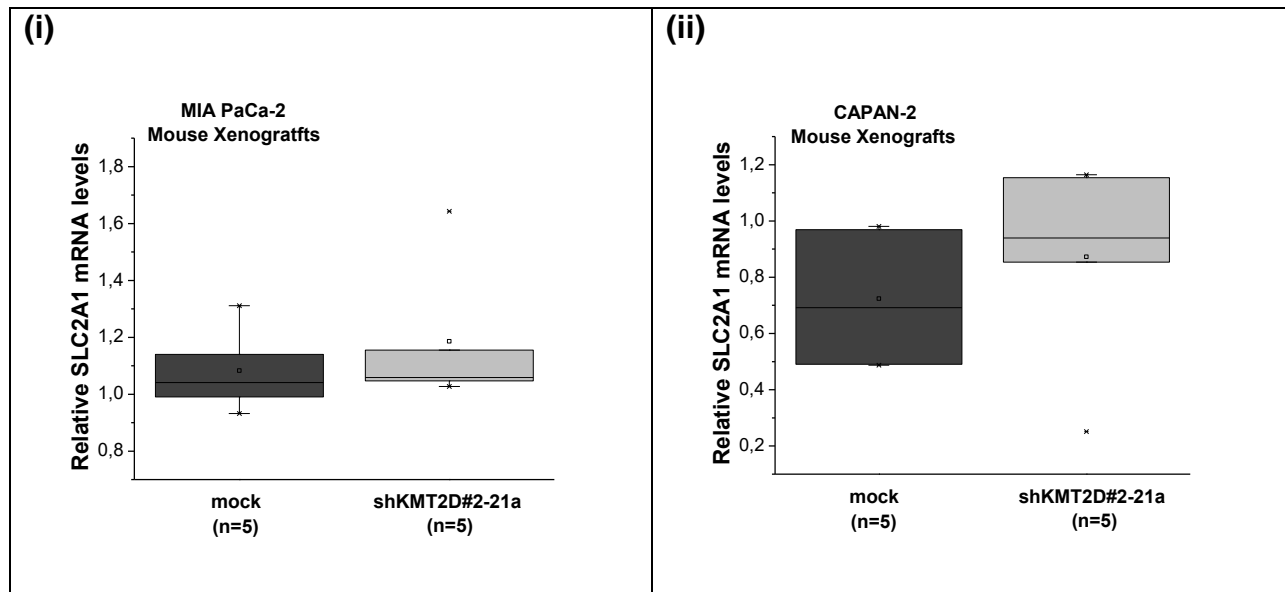

**Supplementary Figure S7. Assessment of SLC2A1 mRNA levels in mouse xenografts.**

*Solute Carrier Family 2 Member 1 (SLC2A1)* expression levels in xenografts from mice injected with mock or shKMT2D#2-21a **(i)** MIA PaCa-2 or **(ii)** CAPAN-2 cells, as assessed by RT-qPCR analysis. Statistical analyses were performed using one-way ANOVA.

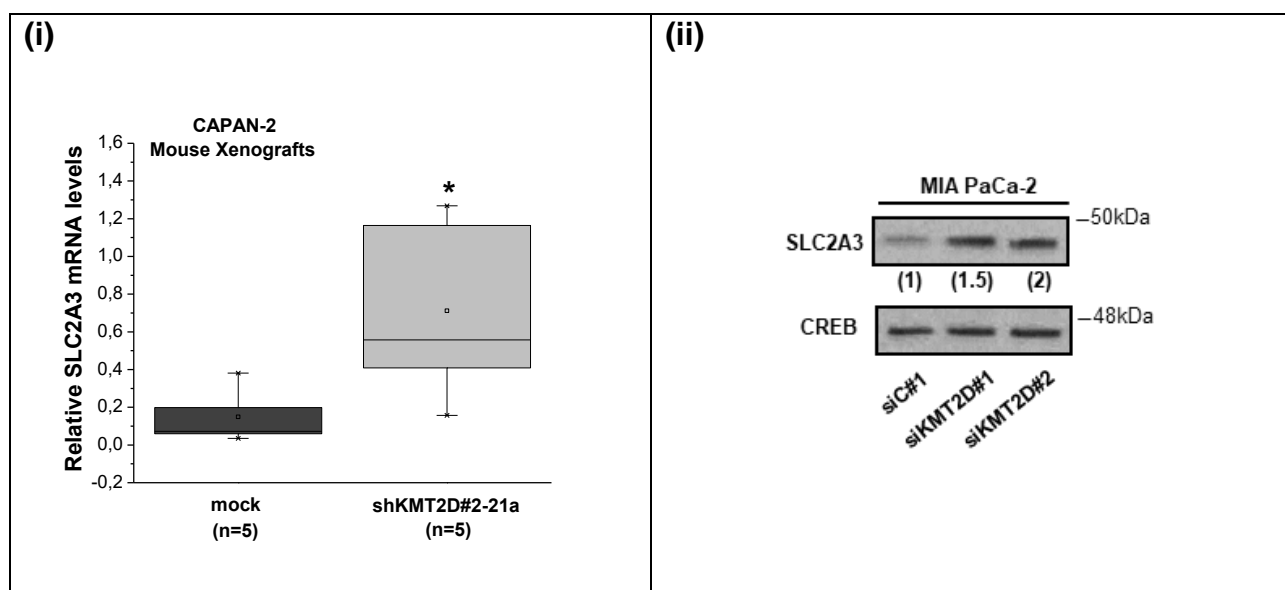

**Supplementary Figure S8. Assessment of SLC2A3 mRNA levels and protein levels upon KMT2D genetic manipulation.**

(i) *Solute Carrier Family 2 Member 3 (SLC2A3)* expression levels in xenografts from mice injected with mock or shKMT2D#2-21a CAPAN-2 cells, as assessed by RT-qPCR analysis. (ii) Effect of *KMT2D* silencing by using 2 different siRNAs on SLC2A3 protein levels, as assessed by IB analysis. Numbers in parentheses denote the average-fold change of the ratio SLC2A3:CREB total protein of siKMT2D-transiently transfected cells compared with siC#1-treated cells (set as default 1) of 2 independent experiments, as assessed by densitometric analysis of the immunoreactive bands. Statistical analyses were performed using one-way ANOVA. Asterisk denotes statistically significant differences, \*  $P < .05$

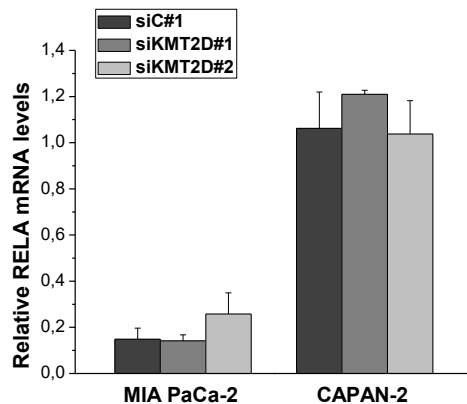

**Supplementary Figure S9. Assessment of REL-associated protein mRNA levels upon KMT2D genetic manipulation.**

Effect of *KMT2D* silencing on *REL-associated protein (p65)* expression, as assessed by RT-qPCR analysis. Statistical analyses were performed using one-way ANOVA.

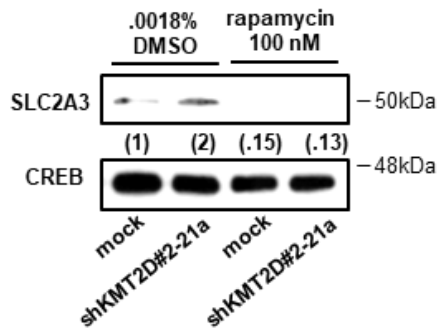

**Supplementary Figure S10. Effect of pharmacological inhibition of mTORC1 on the SLC2A3 levels upon KMT2D suppression.**

Representative IB images for the indicated antibodies upon treatment of MIA PacA-2 cells harboring differential KMT2D levels with 100 nM rapamycin for 24 h. Numbers in parentheses denote the average-fold change of the ratio SLC2A3:CREB total protein of drug-treated cells versus non-treated cells (set as default 1).

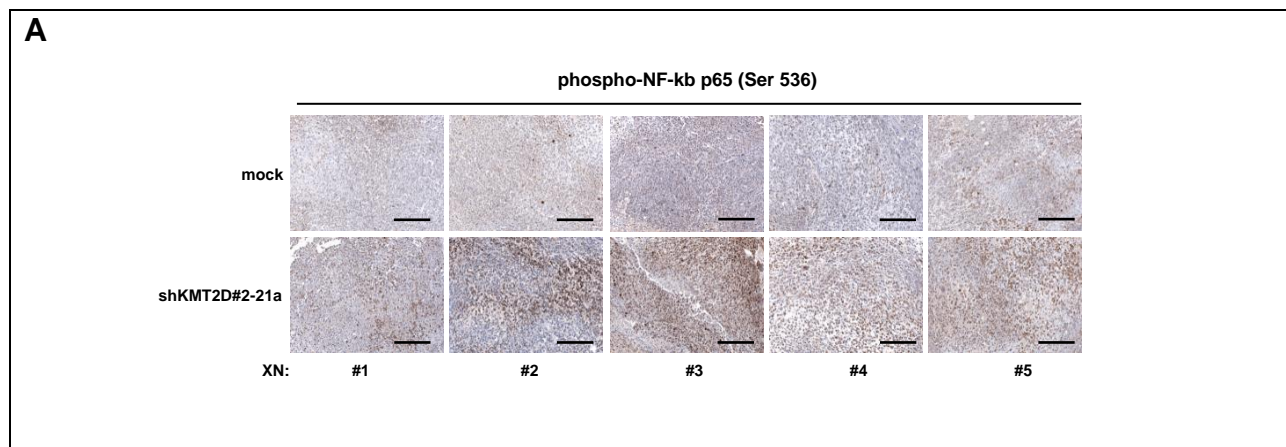

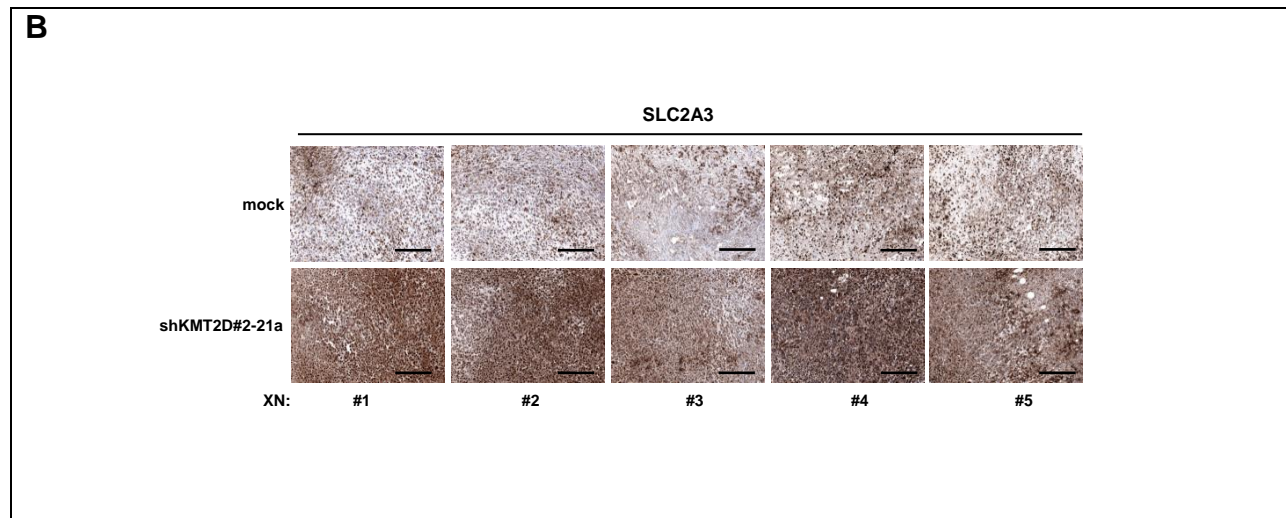

**Supplementary Figure S11. Phospho-NF-kB (Ser 536) and SLC2A3 staining patterns in mouse xenografts bearing KMT2D-depleted or mock-transfected pancreatic cancer cells.**

Representative images (10x magnification) of **(A)** phospho-NF-kb p65 (Ser 536) and **(B)** SLC2A3 expression, as assessed by IHC analysis, in tumors from xenografts bearing KMT2D stably-suppressed or mock-transfected MIA PaCa-2 cells. Scale bars represent 50  $\mu$ m.

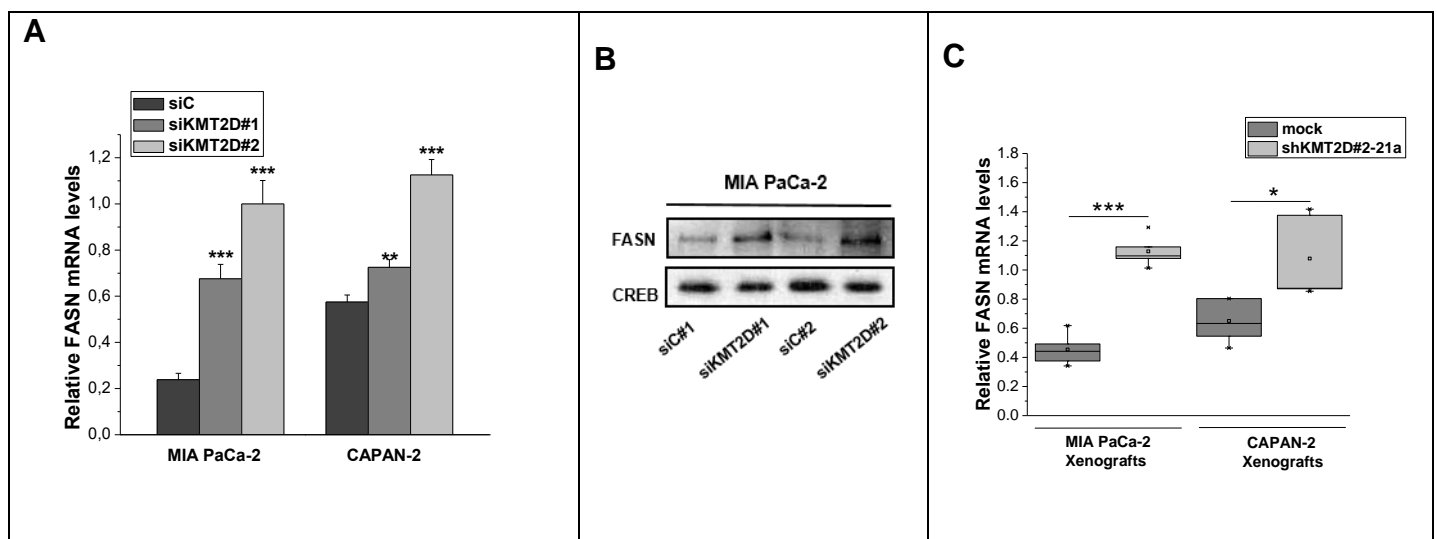

**Supplementary Figure S12. Assessment of FASN expression levels upon KMT2D suppression.**

**(A)** *Fatty Acid Synthase (FASN)* expression levels in *KMT2D* transiently-silenced pancreatic cancer cells, as assessed by RT-qPCR analysis. **(B)** FASN expression levels in *KMT2D*-transiently silenced pancreatic cancer cells, as assessed by IB analysis. **(C)** FASN mRNA levels in xenografts from mice injected with mock or shKMT2D#2-21a cells, as assessed by RT-qPCR analysis. Statistical analyses were performed using one-way ANOVA. Asterisks denote statistically significant differences, \*  $P < .05$ , \*\*  $P < .01$ , \*\*\*  $P < .001$

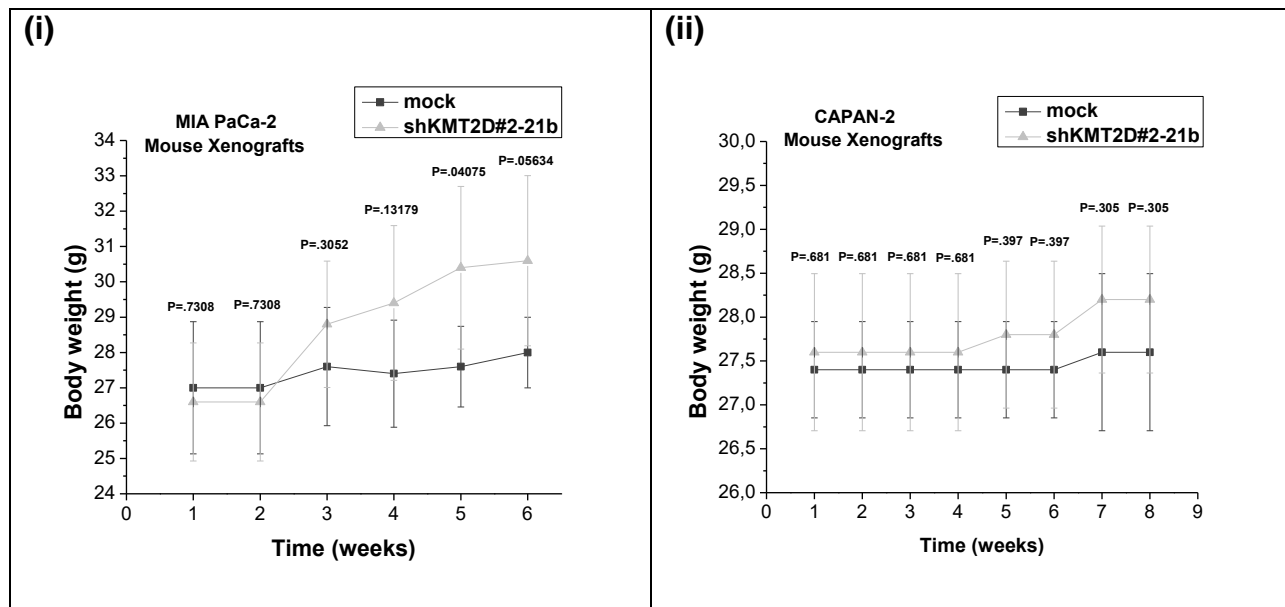

**Supplementary Figure S13. Assessment of body weight changes in mice injected with control or KMT2D-lacking pancreatic cancer cells.**

Body weight graphs of mouse xenografts bearing **(i)** MIA PaCa-2 or **(ii)** CAPAN-2 shKMT2D#2-21b clonal cell lines and mock-transfected cells (n=5 mice per group). Statistical analyses were performed using one-way ANOVA.

**A**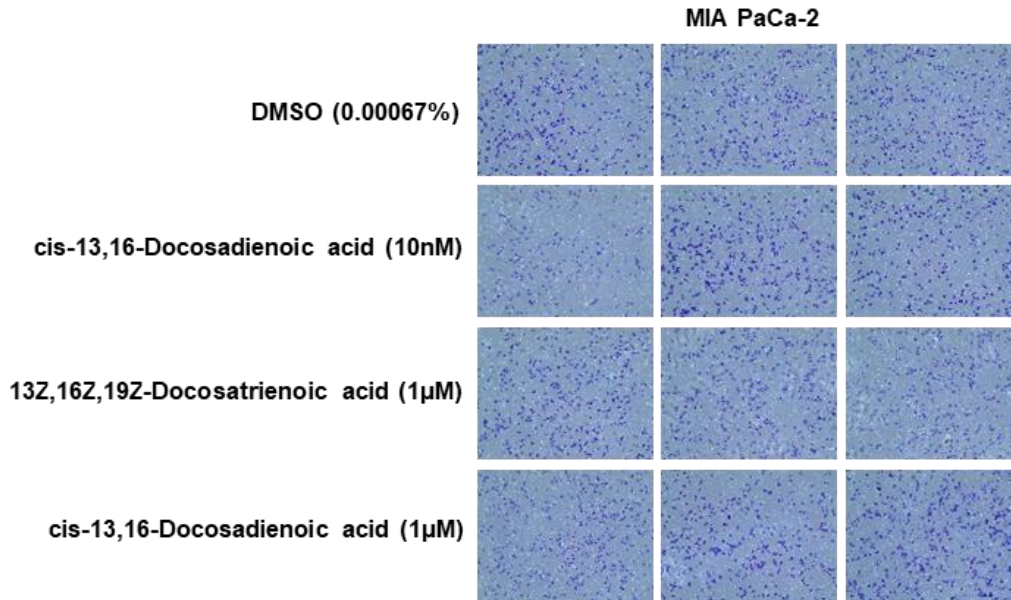**B**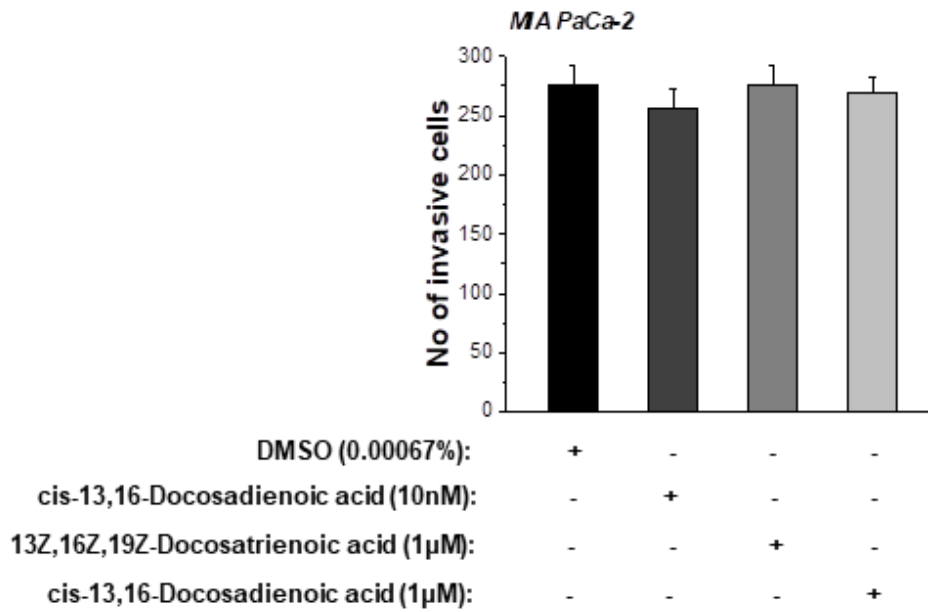



**Supplementary Figure S14. Effects of docosadienoic, docosatrienoic and docosatetraenoic acid on pancreatic cancer cell invasiveness *in vitro*.**

**(A)** Representative images of invading cells upon treatment with docosadienoic, docosatrienoic or docosatetraenoic acid for 22 h and **(B)** the respective quantification. Data are expressed as the mean number of invading cells per field  $\pm$  SE.

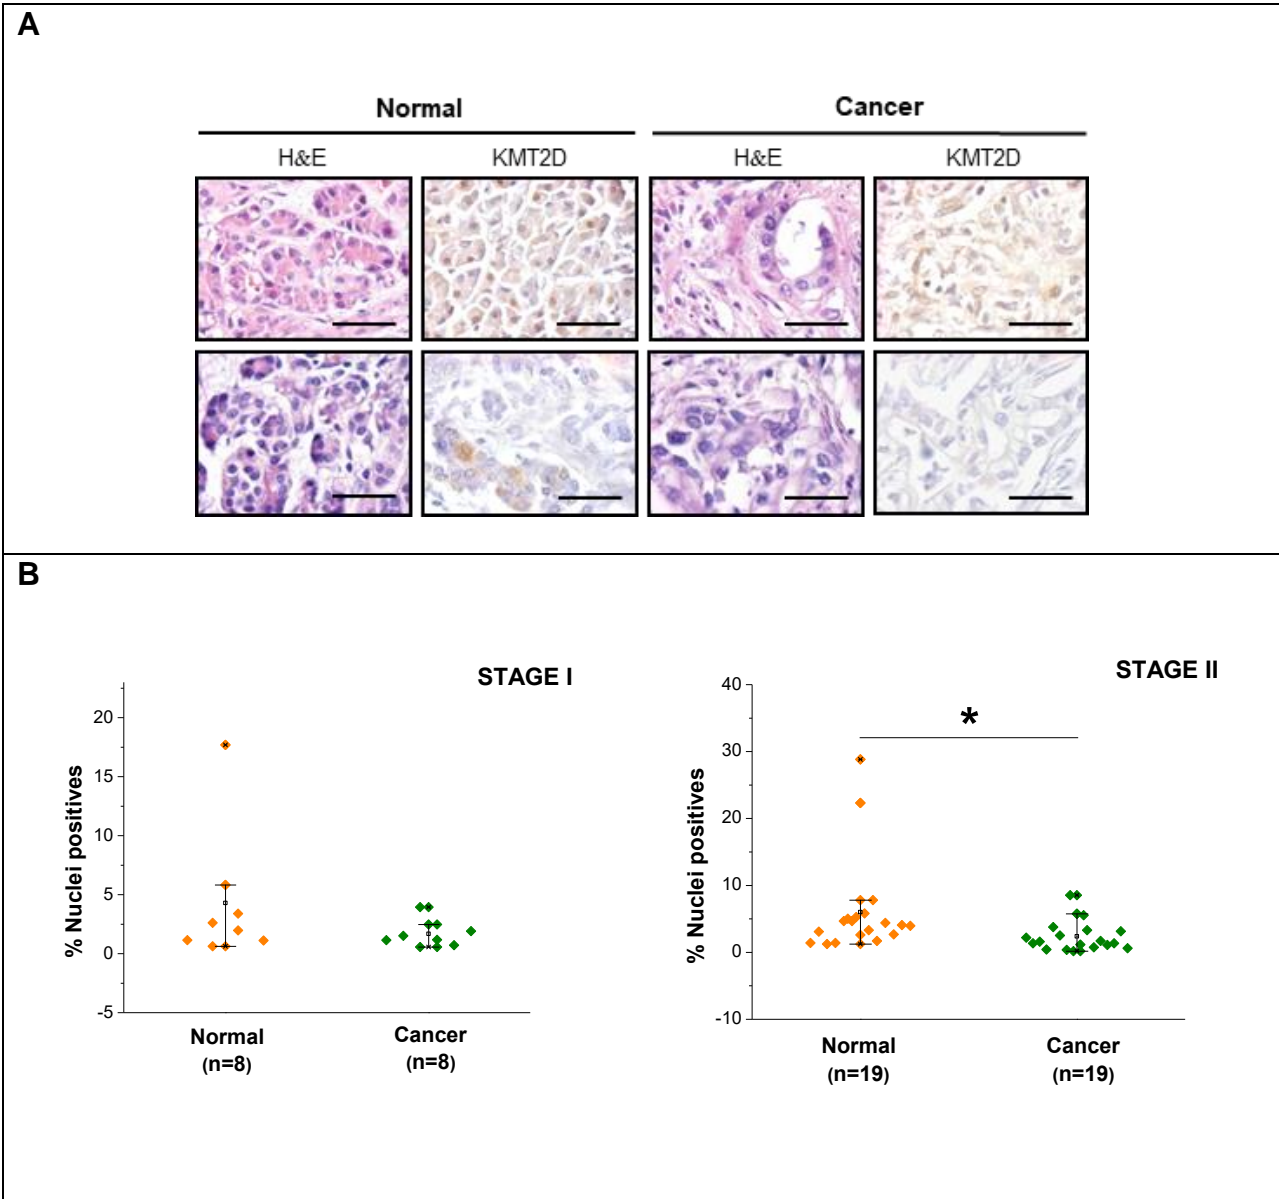

**Supplementary Figure S15. KMT2D staining patterns in matched pancreatic cancer and normal human tissues.**

**(A)** Representative images (4x magnification) of KMT2D expression as assessed by IHC analysis. Scale bars represent 40  $\mu\text{m}$ . **(B)** Graphs for nuclear staining quantification of KMT2D expression in normal pancreata and matched tumors derived from Stage I or Stage II pancreatic cancer patients (Cohort IV).

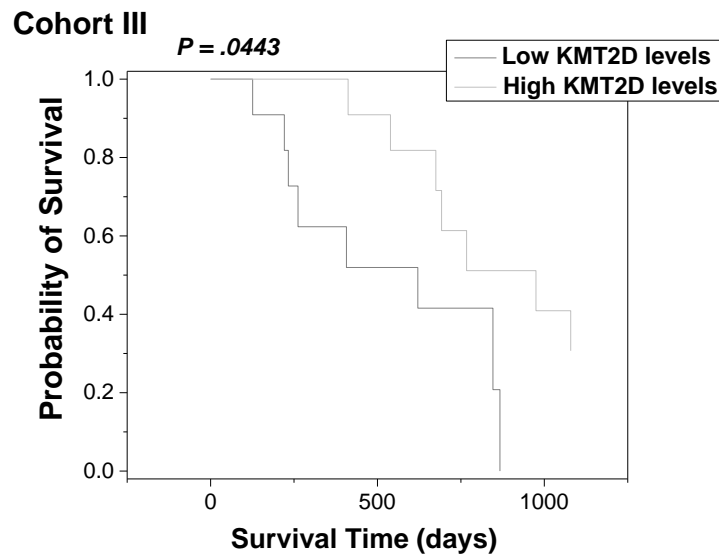

**Supplementary Figure S16. Correlation of *KMT2D* expression with overall patient survival.**

Kaplan-Meier survival curves of patients derived from Cohort III, harboring below median (<.25) and above median (>.25) *KMT2D* levels. 19 out of 22 cases were stratified as Stage III, 1 case as Stage IV pancreatic cancer and 1 case remains

uncharacterized. *r*, Pearson correlation coefficient; Statistical analyses were performed using Pearson correlation.

## 2. SUPPLEMENTARY TABLES

**Table S1**

| Gene symbols | Fold change  | <i>P</i> value | q value | Probes       |
|--------------|--------------|----------------|---------|--------------|
| KMT2D        | -1.741141121 | .095383814     | .253115 | 227527_at    |
| KDM2A        | 1.717960305  | .223050879     | .444714 | 208988_at    |
| KDM4C        | -1.848905517 | .002576512     | .041733 | 1556493_a_at |
| KDM5B        | 1.825971671  | .020177382     | .086848 | 201548_s_at  |
| KDM8         | -2.020680417 | .0000928       | .001968 | 220070_at    |
| SETDB2       | -1.72662285  | .006398742     | .03863  | 235339_at    |
| SETD6        | -1.849110572 | .001285416     | .01239  | 1554555_a_at |
| SETD6        | -1.785867564 | .001087622     | .011024 | 219751_at    |
| SUV420H1     | -1.705577585 | .0073486       | .042803 | 222566_at    |

**Supplementary Table S1 Differential expression of chromatin regulators in pancreatic cancer.**

Table of standardized (Z-scores) expression of the corresponding histone methyltransferases (KMTs) and demethylases (KDMs) in pancreatic cancer as well as adjacent normal tissues originating from Cohort I, as assessed by DNA microarray analysis (Affymetrix U133 Gene Chip Set). Multi-array analysis followed by filtering of uninformative and low variance probes revealed 8 epigenetic factors to be up- or down-regulated  $\geq 1.5$  fold relatively to normal samples. Array fold change is generally reported as log value but has been converted to an arithmetic value for comparison purposes.

**Table S2**

| Time (hours) | MIA PaCa-2             |         |         |         |                            |         |         |         | P value siKMT2D#2 vs siC#1 |
|--------------|------------------------|---------|---------|---------|----------------------------|---------|---------|---------|----------------------------|
|              | Cell Index siC#1 (n=4) |         |         |         | Cell Index siKMT2D#2 (n=4) |         |         |         |                            |
| 0            | 0                      | 0       | 0       | 0       | 0                          | 0       | 0       | 0       |                            |
| 1.556944444  | 0.01993                | 0.00307 | 0.0161  | 0.02633 | 0.01218                    | 0.01417 | 0.04009 | 0.04838 | 0.2787                     |
| 3.306944444  | 0.17238                | 0.10747 | 0.13113 | 0.17127 | 0.16564                    | 0.14392 | 0.15754 | 0.16934 | 0.45282                    |
| 4.806944444  | 0.23896                | 0.17123 | 0.188   | 0.23339 | 0.2298                     | 0.19187 | 0.20576 | 0.21341 | 0.90455                    |
| 6.556944444  | 0.28382                | 0.21657 | 0.23608 | 0.28436 | 0.27899                    | 0.2319  | 0.23863 | 0.24487 | 0.75331                    |
| 8.056944444  | 0.31366                | 0.24275 | 0.26066 | 0.31161 | 0.31102                    | 0.25793 | 0.26227 | 0.26644 | 0.73415                    |
| 9.806944444  | 0.34585                | 0.26983 | 0.29308 | 0.34035 | 0.34456                    | 0.28638 | 0.285   | 0.29172 | 0.67265                    |
| 11.55694444  | 0.37777                | 0.29253 | 0.31851 | 0.36801 | 0.38798                    | 0.31856 | 0.3136  | 0.31742 | 0.86442                    |
| 13.05694444  | 0.40391                | 0.32055 | 0.34242 | 0.39765 | 0.4221                     | 0.34908 | 0.33966 | 0.34518 | 0.94257                    |
| 14.80694444  | 0.43768                | 0.34307 | 0.37141 | 0.42657 | 0.4706                     | 0.39153 | 0.38318 | 0.38488 | 0.69096                    |
| 16.30694444  | 0.46548                | 0.36034 | 0.39357 | 0.44251 | 0.51015                    | 0.42361 | 0.42656 | 0.4204  | 0.39104                    |
| 18.05694444  | 0.48411                | 0.37485 | 0.40839 | 0.46096 | 0.55653                    | 0.46225 | 0.46366 | 0.45651 | 0.17771                    |
| 19.55694444  | 0.49563                | 0.38574 | 0.4169  | 0.46539 | 0.58461                    | 0.49454 | 0.49707 | 0.47523 | 0.08277                    |
| 21.30694444  | 0.51023                | 0.39866 | 0.42816 | 0.47528 | 0.62531                    | 0.51577 | 0.51739 | 0.5098  | 0.0539                     |
| 22.80694444  | 0.53428                | 0.42219 | 0.4468  | 0.49818 | 0.65059                    | 0.54778 | 0.54651 | 0.53385 | 0.04379                    |
| 24.55694444  | 0.57582                | 0.45676 | 0.48193 | 0.53862 | 0.68852                    | 0.58323 | 0.5879  | 0.56766 | 0.0515                     |
| 26.05694444  | 0.61471                | 0.49414 | 0.52977 | 0.57605 | 0.73841                    | 0.62387 | 0.62212 | 0.60624 | 0.05856                    |
| 27.80694444  | 0.66688                | 0.55229 | 0.58403 | 0.6156  | 0.79959                    | 0.67146 | 0.68054 | 0.65628 | 0.05531                    |
| 29.55694444  | 0.71799                | 0.58852 | 0.62445 | 0.66588 | 0.8643                     | 0.74643 | 0.7338  | 0.69781 | 0.0502                     |
| 31.05694444  | 0.76111                | 0.6173  | 0.65519 | 0.69779 | 0.91719                    | 0.78763 | 0.78436 | 0.74619 | 0.04052                    |
| 32.80694444  | 0.79299                | 0.65679 | 0.68778 | 0.72991 | 0.97381                    | 0.86092 | 0.82865 | 0.80414 | 0.01992                    |
| 34.30694444  | 0.82135                | 0.6842  | 0.71556 | 0.75847 | 1.02194                    | 0.90791 | 0.88465 | 0.83918 | 0.01372                    |
| 36.05694444  | 0.84057                | 0.7155  | 0.73749 | 0.78684 | 1.07253                    | 0.94268 | 0.9306  | 0.88986 | 0.00792                    |
| 37.55694444  | 0.87557                | 0.73416 | 0.77224 | 0.82506 | 1.11671                    | 0.9901  | 0.97506 | 0.91518 | 0.00931                    |
| 39.30694444  | 0.92721                | 0.77848 | 0.81946 | 0.86033 | 1.15278                    | 1.04075 | 1.0271  | 0.95036 | 0.00954                    |
| 40.80694444  | 0.97444                | 0.82619 | 0.8596  | 0.90322 | 1.20265                    | 1.06349 | 1.06287 | 0.99585 | 0.01243                    |
| 42.55694444  | 1.03478                | 0.87915 | 0.92693 | 0.9688  | 1.25158                    | 1.13502 | 1.13759 | 1.05507 | 0.01024                    |

|             |         |         |         |         |         |         |         |         |         |
|-------------|---------|---------|---------|---------|---------|---------|---------|---------|---------|
| 44.05694444 | 1.08756 | 0.91975 | 0.98197 | 1.02528 | 1.30741 | 1.18536 | 1.19222 | 1.10988 | 0.01116 |
| 45.80694444 | 1.14759 | 0.97162 | 1.03087 | 1.0803  | 1.38722 | 1.24957 | 1.26116 | 1.17628 | 0.0105  |
| 47.55694444 | 1.20711 | 1.0233  | 1.078   | 1.13413 | 1.44859 | 1.32177 | 1.33128 | 1.24172 | 0.00813 |
| 49.05694444 | 1.24837 | 1.07129 | 1.1352  | 1.19125 | 1.51097 | 1.38801 | 1.3996  | 1.30525 | 0.00558 |
| 50.80694444 | 1.30284 | 1.12654 | 1.19836 | 1.24521 | 1.57876 | 1.45095 | 1.47003 | 1.37221 | 0.0045  |

**Supplementary Table S2 Xcelligence Cell Index and *P* values of siKMT2D#2-treated versus control MIA PaCa-2 cells.**

List of Cell Index values derived from the measured impedances and continuously displayed on the Xcelligence Software user interface. Each experimental condition was performed in quadruplicates. Statistical analyses were performed using one-way ANOVA and the *P* values corresponding to the comparison of siRNA-treated versus control cells are shown at every single time point. *P* values  $\leq 0.05$  are marked in red. Differences in Cell Index measurements are significant after 31 hours of monitoring MIA PaCa-2 cells.

**Table S3**

| Time (hours) | CAPAN-2                |          |          |                            |          |          |                            |          |            |
|--------------|------------------------|----------|----------|----------------------------|----------|----------|----------------------------|----------|------------|
|              | Cell Index siC#1 (n=4) |          |          | Cell Index siKMT2D#2 (n=4) |          |          | P value siKMT2D#2 vs siC#1 |          |            |
| 0            | 0                      | 0        | 0        | 0                          | 0        | 0        | 0                          | 0        |            |
| 1.556944444  | -0.020073              | 0.034304 | 0.050577 | 0.05816                    | 0.06867  | 0.059427 | 0.083027                   | 0.085488 | 0.05928    |
| 3.306944444  | 0.037766               | 0.079534 | 0.099732 | 0.094963                   | 0.141033 | 0.122201 | 0.144497                   | 0.157935 | 0.00721    |
| 4.806944444  | 0.068535               | 0.10916  | 0.125919 | 0.113986                   | 0.179764 | 0.165437 | 0.179974                   | 0.200587 | 0.00175    |
| 6.556944444  | 0.08927                | 0.128111 | 0.139508 | 0.129772                   | 0.205867 | 0.190239 | 0.200832                   | 0.231135 | 9.12692E-4 |
| 8.056944444  | 0.099004               | 0.1331   | 0.155176 | 0.1359                     | 0.219105 | 0.201924 | 0.214894                   | 0.244162 | 8.90077E-4 |
| 9.806944444  | 0.101722               | 0.127247 | 0.158144 | 0.137542                   | 0.229755 | 0.212719 | 0.219634                   | 0.253497 | 5.65592E-4 |
| 11.55694444  | 0.098911               | 0.13078  | 0.15315  | 0.137105                   | 0.230603 | 0.214544 | 0.22037                    | 0.258289 | 5.14131E-4 |
| 13.05694444  | 0.098725               | 0.125915 | 0.146574 | 0.134241                   | 0.233402 | 0.220184 | 0.221467                   | 0.260783 | 2.389E-4   |

|             |          |          |          |          |          |          |          |          |            |
|-------------|----------|----------|----------|----------|----------|----------|----------|----------|------------|
| 14.80694444 | 0.097222 | 0.124272 | 0.145863 | 0.134348 | 0.238026 | 0.220155 | 0.222833 | 0.264834 | 2.67765E-4 |
| 16.30694444 | 0.096102 | 0.122436 | 0.143388 | 0.131518 | 0.239895 | 0.219975 | 0.226634 | 0.263344 | 1.746E-4   |
| 18.05694444 | 0.094791 | 0.12158  | 0.140609 | 0.130565 | 0.241798 | 0.215101 | 0.232633 | 0.262699 | 1.63212E-4 |
| 19.55694444 | 0.087017 | 0.122059 | 0.139195 | 0.126579 | 0.241056 | 0.216168 | 0.227237 | 0.2572   | 1.79476E-4 |
| 21.30694444 | 0.082258 | 0.119865 | 0.137669 | 0.128171 | 0.241253 | 0.21935  | 0.225254 | 0.259881 | 2.21228E-4 |
| 22.80694444 | 0.080472 | 0.123005 | 0.136547 | 0.128523 | 0.243548 | 0.218359 | 0.230869 | 0.259986 | 2.22074E-4 |
| 24.55694444 | 0.075172 | 0.121803 | 0.132296 | 0.132782 | 0.243325 | 0.221071 | 0.22565  | 0.262633 | 3.19085E-4 |
| 26.05694444 | 0.074455 | 0.122927 | 0.134319 | 0.129331 | 0.244887 | 0.22282  | 0.226275 | 0.266265 | 3.30394E-4 |
| 27.80694444 | 0.0737   | 0.119391 | 0.131049 | 0.125469 | 0.242504 | 0.223553 | 0.223904 | 0.271749 | 3.16723E-4 |
| 29.55694444 | 0.072791 | 0.11973  | 0.12722  | 0.125928 | 0.242003 | 0.229328 | 0.218143 | 0.263189 | 2.28539E-4 |
| 31.05694444 | 0.072043 | 0.120048 | 0.124046 | 0.119541 | 0.24577  | 0.22249  | 0.225408 | 0.258103 | 1.34237E-4 |
| 32.80694444 | 0.066999 | 0.11541  | 0.12315  | 0.11772  | 0.244751 | 0.227915 | 0.220318 | 0.259354 | 1.52409E-4 |
| 34.30694444 | 0.062007 | 0.116527 | 0.121774 | 0.12072  | 0.244203 | 0.231497 | 0.223175 | 0.263073 | 2.01022E-4 |
| 36.05694444 | 0.061464 | 0.112372 | 0.116357 | 0.120599 | 0.24808  | 0.225763 | 0.225829 | 0.241364 | 1.1443E-4  |
| 37.55694444 | 0.065181 | 0.11423  | 0.102967 | 0.115519 | 0.245032 | 0.227805 | 0.22235  | 0.239662 | 4.57436E-5 |
| 39.30694444 | 0.06347  | 0.117356 | 0.09523  | 0.116264 | 0.245516 | 0.233652 | 0.219364 | 0.232157 | 6.4013E-5  |
| 40.80694444 | 0.063181 | 0.113218 | 0.090033 | 0.112343 | 0.244225 | 0.236082 | 0.223486 | 0.232254 | 3.19248E-5 |
| 42.55694444 | 0.063229 | 0.11298  | 0.080251 | 0.116045 | 0.250371 | 0.236341 | 0.229732 | 0.235528 | 3.98296E-5 |
| 44.05694444 | 0.066098 | 0.116247 | 0.079267 | 0.117831 | 0.249681 | 0.240117 | 0.232087 | 0.238075 | 3.97361E-5 |
| 45.80694444 | 0.064277 | 0.121713 | 0.084177 | 0.124887 | 0.248549 | 0.242266 | 0.234827 | 0.24359  | 7.50008E-5 |
| 47.55694444 | 0.06762  | 0.124783 | 0.082257 | 0.123198 | 0.252865 | 0.243433 | 0.241608 | 0.247328 | 5.8002E-5  |
| 49.05694444 | 0.070556 | 0.125857 | 0.083957 | 0.124076 | 0.249066 | 0.247302 | 0.249124 | 0.245079 | 4.609E-5   |
| 50.80694444 | 0.071493 | 0.12713  | 0.078742 | 0.124957 | 0.250745 | 0.24804  | 0.252373 | 0.25484  | 5.28337E-5 |

**Supplementary Table S3 Xcelligence Cell Index and *P* values of siKMT2D#2-treated versus control CAPAN-2 cells.**

List of Cell Index values derived from the measured impedances and continuously displayed on the Xcelligence Software user interface. Each experimental condition was performed in quadruplicates. Statistical analyses were performed using one-way ANOVA and the *P* values corresponding to the comparison of siRNA-treated versus control cells are shown at every

single time point. *P* values  $\leq 0.05$  are marked in red. Differences in Cell Index measurements are significant after 3.3 hours of monitoring CAPAN-2 cells.

**Table S4**

| Time (hours) | MIA PaCa-2            |         |         |                                |         |         | <i>P</i> value shKMT2D#2-21a vs mock |
|--------------|-----------------------|---------|---------|--------------------------------|---------|---------|--------------------------------------|
|              | Cell Index mock (n=3) |         |         | Cell Index shKMT2D#2-21a (n=3) |         |         |                                      |
| 0            | 0                     | 0       | 0       | 0                              | 0       | 0       |                                      |
| 1.64611      | -0.03548              | -6.7E-4 | 0.04437 | 0.02274                        | 0.03943 | 0.06906 | 0.20064                              |
| 3.39611      | 0.02795               | 0.05192 | 0.11561 | 0.18392                        | 0.17674 | 0.21105 | 0.01122                              |
| 4.89611      | 0.08816               | 0.105   | 0.17799 | 0.27335                        | 0.25557 | 0.29962 | 0.0074                               |
| 6.64611      | 0.15481               | 0.16696 | 0.25148 | 0.35875                        | 0.32387 | 0.3673  | 0.00872                              |
| 8.14611      | 0.20299               | 0.20718 | 0.29803 | 0.40881                        | 0.36791 | 0.41359 | 0.00934                              |
| 9.89611      | 0.2414                | 0.24242 | 0.3348  | 0.45946                        | 0.41235 | 0.45553 | 0.00791                              |
| 11.39611     | 0.27765               | 0.27711 | 0.37328 | 0.51275                        | 0.45182 | 0.50053 | 0.0084                               |
| 13.14611     | 0.32252               | 0.31923 | 0.41425 | 0.57925                        | 0.51468 | 0.56412 | 0.00546                              |
| 14.64611     | 0.36765               | 0.36132 | 0.46573 | 0.63069                        | 0.56235 | 0.60952 | 0.00676                              |
| 16.39611     | 0.41964               | 0.3977  | 0.5132  | 0.67095                        | 0.6043  | 0.65111 | 0.00806                              |
| 18.14611     | 0.45588               | 0.42176 | 0.5516  | 0.69757                        | 0.62371 | 0.67342 | 0.01334                              |
| 19.64611     | 0.48118               | 0.43805 | 0.57682 | 0.71668                        | 0.64357 | 0.68661 | 0.01645                              |
| 21.39611     | 0.49712               | 0.46084 | 0.59246 | 0.76491                        | 0.67262 | 0.72969 | 0.01243                              |
| 22.89611     | 0.51328               | 0.47107 | 0.61206 | 0.82401                        | 0.73223 | 0.78193 | 0.00751                              |
| 24.64611     | 0.54207               | 0.50643 | 0.65696 | 0.92238                        | 0.82223 | 0.879   | 0.00474                              |
| 26.14611     | 0.59431               | 0.56295 | 0.69114 | 1.00921                        | 0.90233 | 0.96789 | 0.00227                              |
| 27.89611     | 0.66012               | 0.62616 | 0.7551  | 1.1097                         | 1.01301 | 1.06958 | 0.0013                               |
| 29.64444     | 0.74236               | 0.68291 | 0.82783 | 1.1898                         | 1.11702 | 1.1598  | 0.00101                              |
| 31.14444     | 0.78123               | 0.73267 | 0.88596 | 1.26025                        | 1.19066 | 1.23467 | 9.85588E-4                           |
| 32.89444     | 0.82113               | 0.78133 | 0.9338  | 1.32393                        | 1.26901 | 1.29878 | 7.2956E-4                            |
| 34.39444     | 0.86096               | 0.81316 | 0.96802 | 1.38432                        | 1.32704 | 1.34736 | 6.35982E-4                           |
| 36.14444     | 0.90486               | 0.85244 | 1.01082 | 1.46964                        | 1.41646 | 1.44576 | 4.44133E-4                           |

|          |         |         |         |         |         |         |            |
|----------|---------|---------|---------|---------|---------|---------|------------|
| 37.64444 | 0.93605 | 0.88429 | 1.0517  | 1.55654 | 1.52442 | 1.54173 | 3.166E-4   |
| 39.39444 | 0.98666 | 0.94622 | 1.1091  | 1.68043 | 1.66193 | 1.6784  | 1.80687E-4 |
| 40.89444 | 1.04982 | 0.9958  | 1.172   | 1.79348 | 1.78453 | 1.81634 | 1.64543E-4 |
| 42.64444 | 1.10853 | 1.06787 | 1.24812 | 1.91062 | 1.96863 | 1.96647 | 1.52504E-4 |
| 44.39444 | 1.16738 | 1.12633 | 1.3259  | 2.01828 | 2.11814 | 2.1126  | 2.20452E-4 |
| 45.89333 | 1.21602 | 1.1799  | 1.38965 | 2.12459 | 2.24856 | 2.21155 | 2.33143E-4 |
| 47.64333 | 1.26615 | 1.24707 | 1.46187 | 2.21607 | 2.3618  | 2.33057 | 2.79254E-4 |
| 49.14167 | 1.31626 | 1.28497 | 1.50996 | 2.32416 | 2.48603 | 2.44008 | 2.53257E-4 |
| 50.88972 | 1.37807 | 1.34948 | 1.57186 | 2.45744 | 2.59205 | 2.58472 | 1.74688E-4 |
| 52.38972 | 1.43097 | 1.40787 | 1.63916 | 2.55202 | 2.71498 | 2.70421 | 2.09778E-4 |
| 54.13972 | 1.50776 | 1.4887  | 1.70548 | 2.70808 | 2.85097 | 2.89939 | 1.54796E-4 |
| 55.88972 | 1.61186 | 1.58677 | 1.79364 | 2.84836 | 2.98378 | 3.06371 | 1.36266E-4 |
| 57.38972 | 1.67382 | 1.66723 | 1.86846 | 2.96868 | 3.13848 | 3.19889 | 1.38547E-4 |
| 59.13972 | 1.76102 | 1.75566 | 1.96147 | 3.13693 | 3.29247 | 3.29779 | 7.90511E-5 |
| 60.63972 | 1.83668 | 1.84181 | 2.03916 | 3.27238 | 3.39747 | 3.41639 | 5.49798E-5 |
| 62.38972 | 1.92252 | 1.93019 | 2.12654 | 3.42067 | 3.51613 | 3.55384 | 4.18829E-5 |
| 63.88972 | 1.98447 | 2.00046 | 2.20477 | 3.52858 | 3.63979 | 3.66438 | 4.71E-5    |
| 65.63972 | 2.081   | 2.10635 | 2.31714 | 3.69513 | 3.75112 | 3.79362 | 3.91071E-5 |
| 67.13972 | 2.16031 | 2.20805 | 2.37155 | 3.81512 | 3.85113 | 3.88427 | 1.80775E-5 |
| 68.88972 | 2.27924 | 2.32252 | 2.45216 | 3.9797  | 3.95671 | 4.00217 | 6.98761E-6 |
| 70.63972 | 2.3875  | 2.41904 | 2.59425 | 4.08349 | 4.03866 | 4.14571 | 2.22305E-5 |
| 72.13972 | 2.48343 | 2.50893 | 2.70639 | 4.21164 | 4.11882 | 4.21704 | 3.09696E-5 |
| 73.88972 | 2.58672 | 2.61139 | 2.80666 | 4.32744 | 4.22684 | 4.2726  | 2.86289E-5 |
| 75.38972 | 2.72494 | 2.71189 | 2.88812 | 4.45171 | 4.32179 | 4.37495 | 1.90687E-5 |
| 77.13944 | 2.8011  | 2.83126 | 3.01627 | 4.59121 | 4.37858 | 4.4798  | 6.16085E-5 |
| 78.63944 | 2.91401 | 2.90089 | 3.0763  | 4.69108 | 4.42792 | 4.56312 | 7.22673E-5 |
| 80.38944 | 3.02859 | 3.00459 | 3.17597 | 4.83053 | 4.48886 | 4.5994  | 1.61295E-4 |
| 81.88944 | 3.13508 | 3.08395 | 3.24635 | 4.87581 | 4.53915 | 4.64591 | 1.55821E-4 |
| 83.63944 | 3.26149 | 3.17539 | 3.31704 | 4.98727 | 4.6286  | 4.68768 | 2.14344E-4 |
| 85.38944 | 3.39014 | 3.26267 | 3.42184 | 5.10971 | 4.70364 | 4.74254 | 4.15676E-4 |
| 86.88944 | 3.49607 | 3.32432 | 3.48201 | 5.156   | 4.74067 | 4.76751 | 5.56886E-4 |
| 88.63944 | 3.55179 | 3.40723 | 3.55229 | 5.20273 | 4.78268 | 4.80914 | 5.83157E-4 |



|           |         |         |         |         |         |         |            |
|-----------|---------|---------|---------|---------|---------|---------|------------|
| 90.13944  | 3.68251 | 3.47698 | 3.62795 | 5.22825 | 4.83796 | 4.83767 | 6.76022E-4 |
| 91.88944  | 3.80046 | 3.55814 | 3.72993 | 5.40447 | 4.8729  | 4.88635 | 0.00199    |
| 93.38944  | 3.87641 | 3.6527  | 3.81331 | 5.46153 | 4.88317 | 4.93434 | 0.00261    |
| 95.13944  | 3.98026 | 3.72709 | 3.87598 | 5.55389 | 4.93473 | 4.9804  | 0.00365    |
| 96.88944  | 4.09917 | 3.79225 | 3.97422 | 5.58058 | 4.95065 | 5.0155  | 0.00498    |
| 98.38944  | 4.20116 | 3.86002 | 4.01449 | 5.60487 | 4.95606 | 5.02309 | 0.00689    |
| 100.13917 | 4.31632 | 3.92505 | 4.10531 | 5.61392 | 4.95159 | 5.04212 | 0.01001    |
| 101.63917 | 4.43169 | 3.98702 | 4.17207 | 5.68448 | 4.98647 | 5.00756 | 0.01735    |
| 103.38917 | 4.54915 | 4.03133 | 4.20871 | 5.70852 | 4.99687 | 5.00298 | 0.02571    |
| 104.88917 | 4.65601 | 4.05039 | 4.27636 | 5.75427 | 4.98478 | 4.98693 | 0.04245    |
| 106.63917 | 4.71997 | 4.08675 | 4.32626 | 5.76795 | 4.94804 | 4.93416 | 0.06472    |
| 108.13917 | 4.81067 | 4.13599 | 4.35874 | 5.79617 | 4.90208 | 4.91447 | 0.09709    |
| 109.88917 | 4.88043 | 4.13423 | 4.38586 | 5.80425 | 4.8672  | 4.86941 | 0.13465    |
| 111.63917 | 4.98009 | 4.16329 | 4.4206  | 5.82269 | 4.80838 | 4.8519  | 0.19337    |
| 113.13917 | 5.03647 | 4.18176 | 4.41413 | 5.83088 | 4.74924 | 4.80327 | 0.25046    |
| 114.88917 | 5.13655 | 4.20232 | 4.42149 | 5.7937  | 4.66986 | 4.75638 | 0.34815    |
| 116.38917 | 5.18354 | 4.19483 | 4.42152 | 5.77905 | 4.6451  | 4.7042  | 0.40361    |
| 118.13917 | 5.23074 | 4.18789 | 4.45534 | 5.76533 | 4.57388 | 4.6051  | 0.51611    |
| 119.63917 | 5.25751 | 4.19731 | 4.42753 | 5.72818 | 4.5083  | 4.57409 | 0.57714    |
| 121.38917 | 5.35591 | 4.17537 | 4.41114 | 5.70622 | 4.44587 | 4.49845 | 0.68849    |

**Supplementary Table S4 Xcelligence Cell Index and *P* values of shKMT2D#2-21a versus mock MIA PaCa-2 cells.**

List of Cell Index values derived from the measured impedances and continuously displayed on the Xcelligence Software user interface. Each experimental condition was performed in triplicates. Statistical analyses were performed using one-way ANOVA and the *P* values corresponding to the comparison of shRNA-stably transfected versus control cells are shown at every single time point. *P* values  $\leq 0.05$  are marked in red. Differences in Cell Index measurements are significant after 3.3 hours of monitoring.

**Table S5**

| Time (hours) | CAPAN-2               |         |         |         |                                |         |         |         |                               |
|--------------|-----------------------|---------|---------|---------|--------------------------------|---------|---------|---------|-------------------------------|
|              | Cell Index mock (n=4) |         |         |         | Cell Index shKMT2D#2-21a (n=4) |         |         |         | P value shKMT2D#2-21a vs mock |
| 0            | 0                     | 0       | 0       | 0       | 0                              | 0       | 0       | 0       | 0                             |
| 1.64611      | 0.01462               | 0.01218 | 0.03884 | 0.06201 | 0.07853                        | 0.04418 | 0.02288 | 0.03539 | 0.45515                       |
| 3.39611      | 0.07544               | 0.05766 | 0.07975 | 0.10362 | 0.1246                         | 0.08982 | 0.07047 | 0.0966  | 0.31017                       |
| 4.89611      | 0.11267               | 0.08142 | 0.10833 | 0.13384 | 0.15458                        | 0.11595 | 0.10411 | 0.13383 | 0.2854                        |
| 6.64611      | 0.13282               | 0.09975 | 0.13087 | 0.15106 | 0.17986                        | 0.13594 | 0.12981 | 0.1606  | 0.19468                       |
| 8.14611      | 0.14139               | 0.10637 | 0.13721 | 0.15648 | 0.19189                        | 0.14788 | 0.13682 | 0.17371 | 0.14612                       |
| 9.89611      | 0.1525                | 0.10688 | 0.1374  | 0.1588  | 0.20485                        | 0.15644 | 0.14623 | 0.18281 | 0.10382                       |
| 11.39611     | 0.15252               | 0.10846 | 0.13751 | 0.15606 | 0.21631                        | 0.16728 | 0.15531 | 0.19419 | 0.04309                       |
| 13.14611     | 0.15796               | 0.10767 | 0.13622 | 0.15512 | 0.22899                        | 0.1757  | 0.16183 | 0.20175 | 0.03085                       |
| 14.64611     | 0.15662               | 0.10242 | 0.13536 | 0.15155 | 0.23498                        | 0.18659 | 0.17484 | 0.20937 | 0.01139                       |
| 16.39611     | 0.15975               | 0.09829 | 0.13219 | 0.14733 | 0.24868                        | 0.19501 | 0.18465 | 0.21619 | 0.00748                       |
| 18.14611     | 0.15871               | 0.09698 | 0.13278 | 0.14415 | 0.25905                        | 0.21019 | 0.18786 | 0.22294 | 0.00473                       |
| 19.64611     | 0.15639               | 0.09199 | 0.13041 | 0.1444  | 0.27136                        | 0.22274 | 0.1972  | 0.23074 | 0.00301                       |
| 21.39611     | 0.15989               | 0.09242 | 0.13139 | 0.13816 | 0.28585                        | 0.23164 | 0.1939  | 0.23603 | 0.00402                       |
| 22.89611     | 0.16406               | 0.08835 | 0.13004 | 0.13723 | 0.29695                        | 0.24713 | 0.20966 | 0.23996 | 0.00258                       |
| 24.64611     | 0.1619                | 0.08548 | 0.12986 | 0.13359 | 0.30964                        | 0.25627 | 0.21183 | 0.25081 | 0.0023                        |
| 26.14611     | 0.1678                | 0.0876  | 0.12719 | 0.1307  | 0.32135                        | 0.27093 | 0.23042 | 0.2566  | 0.00136                       |
| 27.89611     | 0.16923               | 0.08459 | 0.12604 | 0.13104 | 0.3342                         | 0.28139 | 0.2374  | 0.26743 | 0.00124                       |
| 29.64444     | 0.17416               | 0.08085 | 0.12452 | 0.12672 | 0.34964                        | 0.29744 | 0.24991 | 0.27925 | 0.00104                       |
| 31.14444     | 0.1824                | 0.07759 | 0.126   | 0.12553 | 0.35925                        | 0.3033  | 0.25879 | 0.28762 | 0.00116                       |
| 32.89444     | 0.18152               | 0.07712 | 0.12331 | 0.12159 | 0.36834                        | 0.31755 | 0.2705  | 0.29826 | 7.34904E-4                    |
| 34.39444     | 0.18649               | 0.07346 | 0.11996 | 0.11769 | 0.37439                        | 0.32594 | 0.27598 | 0.30492 | 7.57403E-4                    |
| 36.14444     | 0.18978               | 0.07419 | 0.12101 | 0.11213 | 0.37185                        | 0.33697 | 0.28399 | 0.3099  | 5.85979E-4                    |
| 37.64444     | 0.19512               | 0.06979 | 0.11535 | 0.11125 | 0.38244                        | 0.35255 | 0.29787 | 0.32168 | 5.18973E-4                    |
| 39.39444     | 0.19763               | 0.06798 | 0.10924 | 0.10578 | 0.39243                        | 0.36354 | 0.30484 | 0.32708 | 5.16712E-4                    |
| 40.89444     | 0.19881               | 0.06364 | 0.11474 | 0.09785 | 0.39526                        | 0.37742 | 0.3182  | 0.33605 | 4.11666E-4                    |
| 42.64444     | 0.20051               | 0.0574  | 0.10941 | 0.09803 | 0.40709                        | 0.39498 | 0.33898 | 0.34726 | 3.17093E-4                    |

|          |         |         |         |         |         |         |         |         |            |
|----------|---------|---------|---------|---------|---------|---------|---------|---------|------------|
| 44.39444 | 0.20842 | 0.05262 | 0.10969 | 0.09621 | 0.42697 | 0.41296 | 0.35257 | 0.35588 | 3.92894E-4 |
| 45.89333 | 0.21108 | 0.03697 | 0.11015 | 0.09583 | 0.44859 | 0.42364 | 0.36593 | 0.36544 | 4.67138E-4 |
| 47.64333 | 0.21688 | 0.03923 | 0.11628 | 0.09659 | 0.46535 | 0.44283 | 0.39169 | 0.3835  | 3.54637E-4 |
| 49.14167 | 0.22108 | 0.04193 | 0.11735 | 0.09839 | 0.48161 | 0.47117 | 0.40379 | 0.40015 | 3.13406E-4 |
| 50.88972 | 0.23155 | 0.04425 | 0.11829 | 0.09668 | 0.50937 | 0.48388 | 0.42265 | 0.41374 | 3.36406E-4 |
| 52.38972 | 0.23578 | 0.04409 | 0.12151 | 0.09185 | 0.52924 | 0.49896 | 0.44429 | 0.42949 | 2.90154E-4 |
| 54.13972 | 0.24363 | 0.04808 | 0.12219 | 0.08561 | 0.54634 | 0.5207  | 0.45773 | 0.4489  | 2.73627E-4 |
| 55.88972 | 0.253   | 0.05448 | 0.12579 | 0.08556 | 0.57381 | 0.54568 | 0.46975 | 0.46185 | 3.10678E-4 |
| 57.38972 | 0.25673 | 0.05762 | 0.13062 | 0.08629 | 0.58611 | 0.56827 | 0.49624 | 0.48122 | 2.27898E-4 |
| 59.13972 | 0.26142 | 0.06335 | 0.13304 | 0.08675 | 0.60869 | 0.60007 | 0.50725 | 0.49634 | 2.2984E-4  |
| 60.63972 | 0.26829 | 0.06477 | 0.13566 | 0.09055 | 0.62504 | 0.61133 | 0.53163 | 0.51868 | 1.79323E-4 |
| 62.38972 | 0.27364 | 0.06557 | 0.13821 | 0.089   | 0.64896 | 0.63632 | 0.54708 | 0.53735 | 1.76477E-4 |
| 63.88972 | 0.27408 | 0.07054 | 0.14284 | 0.0914  | 0.67956 | 0.66286 | 0.55842 | 0.54902 | 1.77675E-4 |
| 65.63972 | 0.28038 | 0.07291 | 0.14651 | 0.09407 | 0.7024  | 0.68778 | 0.57252 | 0.56675 | 1.79125E-4 |
| 67.13972 | 0.28963 | 0.07739 | 0.14796 | 0.09153 | 0.72935 | 0.71003 | 0.58763 | 0.58466 | 1.92732E-4 |
| 68.88972 | 0.29532 | 0.07692 | 0.15511 | 0.08452 | 0.75266 | 0.72862 | 0.60422 | 0.60104 | 1.99467E-4 |
| 70.63972 | 0.29942 | 0.08279 | 0.15458 | 0.08815 | 0.7841  | 0.76832 | 0.63173 | 0.62832 | 1.65234E-4 |
| 72.13972 | 0.30537 | 0.08631 | 0.1581  | 0.08772 | 0.80715 | 0.79405 | 0.65885 | 0.64177 | 1.55946E-4 |
| 73.88972 | 0.31327 | 0.09277 | 0.16368 | 0.08601 | 0.83972 | 0.81829 | 0.68513 | 0.67534 | 1.3085E-4  |
| 75.38972 | 0.3182  | 0.08969 | 0.16533 | 0.08903 | 0.85848 | 0.85382 | 0.71023 | 0.7047  | 1.09467E-4 |
| 77.13944 | 0.33027 | 0.09882 | 0.16565 | 0.09587 | 0.89576 | 0.90812 | 0.73604 | 0.72969 | 1.22138E-4 |
| 78.63944 | 0.33924 | 0.10003 | 0.16911 | 0.09508 | 0.94837 | 0.94157 | 0.77601 | 0.76276 | 1.10465E-4 |
| 80.38944 | 0.3487  | 0.10577 | 0.17359 | 0.0987  | 1.00222 | 0.98485 | 0.80443 | 0.79951 | 1.11257E-4 |
| 81.88944 | 0.35949 | 0.11137 | 0.18091 | 0.09913 | 1.03302 | 1.03145 | 0.84508 | 0.82332 | 1.06542E-4 |
| 83.63944 | 0.36418 | 0.11618 | 0.18941 | 0.10619 | 1.06645 | 1.07785 | 0.86758 | 0.8391  | 1.17714E-4 |
| 85.38944 | 0.37339 | 0.12079 | 0.19537 | 0.10567 | 1.11719 | 1.12588 | 0.89975 | 0.8771  | 1.16753E-4 |
| 86.88944 | 0.38011 | 0.12661 | 0.19735 | 0.10701 | 1.1595  | 1.18502 | 0.92108 | 0.90369 | 1.36251E-4 |
| 88.63944 | 0.39188 | 0.13656 | 0.20597 | 0.11024 | 1.2158  | 1.23839 | 0.96176 | 0.94011 | 1.36401E-4 |
| 90.13944 | 0.3994  | 0.14292 | 0.21497 | 0.10799 | 1.28016 | 1.3008  | 0.99606 | 0.97683 | 1.51674E-4 |
| 91.88944 | 0.4124  | 0.14896 | 0.22115 | 0.11206 | 1.35973 | 1.35436 | 1.02401 | 1.01358 | 1.84004E-4 |
| 93.38944 | 0.41764 | 0.15343 | 0.2324  | 0.11258 | 1.42202 | 1.43345 | 1.06019 | 1.0492  | 2.09515E-4 |
| 95.13944 | 0.42643 | 0.16578 | 0.23832 | 0.11547 | 1.52347 | 1.56719 | 1.07862 | 1.09339 | 3.56668E-4 |

|           |          |         |          |          |         |           |         |         |            |
|-----------|----------|---------|----------|----------|---------|-----------|---------|---------|------------|
| 96.88944  | 0.43567  | 0.17158 | 0.24716  | 0.11923  | 1.60117 | 1.63223   | 1.12655 | 1.1347  | 3.58733E-4 |
| 98.38944  | 0.44724  | 0.17464 | 0.25659  | 0.12718  | 1.68784 | 1.75962   | 1.18409 | 1.18649 | 4.1616E-4  |
| 100.13917 | 0.46331  | 0.17956 | 0.26242  | 0.13036  | 1.77026 | 1.84637   | 1.23422 | 1.22194 | 4.72084E-4 |
| 101.63917 | 0.46731  | 0.18361 | 0.27419  | 0.1322   | 1.86374 | 1.9746    | 1.27434 | 1.27042 | 5.86156E-4 |
| 103.38917 | 0.48137  | 0.18737 | 0.28146  | 0.13378  | 1.95985 | 2.08392   | 1.32145 | 1.31949 | 6.71452E-4 |
| 104.88917 | 0.49534  | 0.19351 | 0.29001  | 0.13492  | 2.07408 | 2.28446   | 1.37379 | 1.37304 | 9.59862E-4 |
| 106.63917 | 0.51044  | 0.19558 | 0.29743  | 0.13514  | 2.18489 | 2.39506   | 1.40685 | 1.41617 | 0.00115    |
| 108.13917 | 0.52609  | 0.21009 | 0.3009   | 0.1425   | 2.32248 | 2.58844   | 1.46406 | 1.47154 | 0.00149    |
| 109.88917 | 0.53772  | 0.21542 | 0.31296  | 0.14786  | 2.45081 | 2.78011   | 1.51131 | 1.51776 | 0.00193    |
| 111.63917 | 0.54959  | 0.22733 | 0.32882  | 0.14885  | 2.67416 | 2.93264   | 1.56531 | 1.60026 | 0.00217    |
| 113.13917 | 0.56386  | 0.23495 | 0.33118  | 0.15368  | 2.86434 | 3.1599    | 1.62501 | 1.65958 | 0.00272    |
| 114.88917 | 0.57123  | 0.24506 | 0.34073  | 0.15369  | 3.10717 | 3.39293   | 1.70519 | 1.75151 | 0.00306    |
| 116.38917 | 0.58829  | 0.25    | 0.35437  | 0.16194  | 3.29853 | 3.66115   | 1.7787  | 1.82755 | 0.00361    |
| 118.13917 | 0.60761  | 0.2572  | 0.36414  | 0.16934  | 3.511   | 4.04172   | 1.85226 | 1.90569 | 0.00469    |
| 119.63917 | 0.62744  | 0.26197 | 0.36525  | 0.17169  | 3.77049 | 4.463     | 1.9252  | 2.01165 | 0.00587    |
| 121.38917 | 0.638784 | 0.27081 | 0.376880 | 0.177430 | 4.07119 | 5.0249788 | 2.02605 | 2.09975 | 0.00781    |

**Supplementary Table S5 Xcelligence Cell Index and *P* values of shKMT2D#2-21a versus mock CAPAN-2 cells.**

List of Cell Index values derived from the measured impedances and continuously displayed on the Xcelligence Software user interface. Each experimental condition was performed in triplicates. Statistical analyses were performed using one-way ANOVA and the *P* values corresponding to the comparison of shRNA-stably transfected versus control cells are shown at every single time point. *P* values  $\leq 0.05$  are marked in red. Differences in Cell Index measurements are significant after 11 hours of monitoring.

**Table S6**

| Gene symbols | Mean difference | P value    | q value    | Probes     |
|--------------|-----------------|------------|------------|------------|
| SETD3        | 0.264457        | .0000027   | .000353114 | cg16694837 |
| KMT2D        | 0.293902        | .000394    | .003574961 | cg13007988 |
| KMT2D        | 0.276747        | .0000201   | .000762928 | cg00522588 |
| KDM3A        | 0.254105        | .000000979 | .000258094 | cg01878308 |
| KDM2B        | -0.26654        | .0000164   | .000694    | cg15234492 |
| SETDB2       | -0.31333        | .0000133   | .002972    | cg05743713 |

**Supplementary Table S6 Differential methylation of chromatin regulators in pancreatic cancer.**

Table of standardized (Z-scores) expression of the corresponding KMTs and KDMs in pancreatic cancer as well as adjacent normal tissues, as assessed by the Infinium Human Methylation 450 Bead ChIP Array. Wilcoxon rank-sum tests were conducted to compare methylation array data between pancreatic cancer patients and healthy controls. Genes shown are up- or down-regulated  $\geq 1.5$  fold relatively to normal samples and with statistical significance  $P \leq .001$

**Table S7**

(i)

| Chr | Start    | End      | Ref | Alt | Func.<br>refGene | ExonicFunc.<br>refGene | AAChange.refGene                          |
|-----|----------|----------|-----|-----|------------------|------------------------|-------------------------------------------|
| 12  | 49421179 | 49421179 | G   | C   | intronic         | na                     | na                                        |
| 12  | 49422795 | 49422795 | G   | A   | intronic         | na                     | na                                        |
| 12  | 49427919 | 49427919 | T   | C   | exonic           | synonymous<br>SNV      | KMT2D:NM_003482:exon38:c.A10671G:p.P3557P |
| 12  | 49439659 | 49439659 | C   | T   | intronic         | na                     | na                                        |
| 12  | 49445447 | 49445447 | T   | A   | exonic           | synonymous<br>SNV      | KMT2D:NM_003482:exon10:c.A2019T:p.P673P   |

|    |          |          |   |   |        |                      |                                         |
|----|----------|----------|---|---|--------|----------------------|-----------------------------------------|
| 12 | 49445536 | 49445536 | T | G | exonic | nonsynonymous<br>SNV | KMT2D:NM_003482:exon10:c.A1930C:p.M644L |
| 12 | 49445540 | 49445540 | T | A | exonic | synonymous<br>SNV    | KMT2D:NM_003482:exon10:c.A1926T:p.S642S |
| 12 | 49447819 | 49447819 | T | C | exonic | synonymous<br>SNV    | KMT2D:NM_003482:exon5:c.A615G:p.L205L   |

**(ii)**

| Chr | Start    | End      | Ref      | Alt | Func.    | ExonicFunc.       | AAChange.refGene                          |
|-----|----------|----------|----------|-----|----------|-------------------|-------------------------------------------|
|     |          |          |          |     | refGene  | refGene           |                                           |
| 12  | 49413208 | 49413208 | -        | A   | UTR3     | na                | na                                        |
| 12  | 49415026 | 49415026 | G        | A   | UTR3     | na                | na                                        |
| 12  | 49416048 | 49416048 | C        | -   | intronic | na                | na                                        |
| 12  | 49419677 | 49419677 | G        | C   | intronic | na                | na                                        |
| 12  | 49421179 | 49421179 | G        | C   | intronic | na                | na                                        |
| 12  | 49422094 | 49422094 | A        | G   | intronic | na                | na                                        |
| 12  | 49424616 | 49424616 | G        | A   | intronic | na                | na                                        |
| 12  | 49424878 | 49424881 | TCT<br>G | -   | intronic | na                | na                                        |
| 12  | 49425978 | 49425978 | T        | C   | exonic   | synonymous<br>SNV | KMT2D:NM_003482:exon39:c.A12510G:p.P4170P |
| 12  | 49427652 | 49427652 | C        | T   | exonic   | synonymous<br>SNV | KMT2D:NM_003482:exon39:c.G10836A:p.Q3612Q |
| 12  | 49434074 | 49434074 | C        | A   | exonic   | synonymous<br>SNV | KMT2D:NM_003482:exon31:c.G7479T:p.G2493G  |
| 12  | 49436724 | 49436724 | A        | G   | intronic | na                | na                                        |
| 12  | 49439521 | 49439521 | A        | G   | intronic | na                | na                                        |
| 12  | 49439659 | 49439659 | C        | T   | intronic | na                | na                                        |
| 12  | 49441382 | 49441382 | T        | -   | intronic | na                | na                                        |
| 12  | 49442359 | 49442359 | -        | A   | intronic | na                | na                                        |
| 12  | 49442813 | 49442813 | T        | C   | intronic | na                | na                                        |
| 12  | 49444545 | 49444545 | G        | A   | exonic   | synonymous<br>SNV | KMT2D:NM_003482:exon11:c.C2826T:p.I942I   |

|    |          |          |   |   |          |    |    |
|----|----------|----------|---|---|----------|----|----|
| 12 | 49448881 | 49448881 | T | G | intronic | na | na |
|----|----------|----------|---|---|----------|----|----|

**Table S7 *KMT2D* mutational status.**

Sequence alterations in *KMT2D* gene, as assessed by Whole Exome Sequencing, in (i) MIA PaCa-2 and (ii) CAPAN-2 cell lines. Chr, Chromosome number; Start, Start position; End, End position; Ref, Reference base(s); Alt, Alternate non-reference alleles called on at least one of the samples; Func.refGene, Regions (e.g., exonic, intronic, non-coding RNA) that one variant hits; ExonicFunc.refGene, Exonic variant function, e.g., nonsynonymous, synonymous, frameshift insertion; AACChange.refGene, Amino acid change. For example, *KMT2D*:NM\_003482:exon38:c.A10671G:p.P3557P stands for gene name, Known RefSeq accession, region, cDNA level change, protein level change.

**Table S8**

(i)

| Chr | Start   | End     | Ref | Alt | Func.refGene | ExonicFunc.refGene | AACChange.refGene                        |
|-----|---------|---------|-----|-----|--------------|--------------------|------------------------------------------|
| 12  | 8072008 | 8072008 | T   | C   | UTR3         | na                 | na                                       |
| 12  | 8073496 | 8073496 | T   | -   | UTR3         | na                 | na                                       |
| 12  | 8074192 | 8074192 | G   | A   | exonic       | synonymous SNV     | SLC2A3:NM_006931:exon10:c.C1308T:p.T436T |
| 12  | 8075117 | 8075117 | A   | G   | intronic     | na                 | na                                       |
| 12  | 8075286 | 8075286 | C   | T   | intronic     | na                 | na                                       |
| 12  | 8083541 | 8083541 | C   | T   | intronic     | na                 | na                                       |
| 12  | 8085547 | 8085547 | T   | C   | intronic     | na                 | na                                       |
| 12  | 8086083 | 8086083 | C   | A   | intronic     | na                 | na                                       |

|         |         |   |   |          |    |    |
|---------|---------|---|---|----------|----|----|
| 8088227 | 8088227 | T | C | intronic | na | na |
| 8088766 | 8088766 | T | C | UTR5     | na | na |

(ii)

| Chr | Start   | End     | Ref | Alt | Func.    | ExonicFunc.    | AAChange.refGene                         |
|-----|---------|---------|-----|-----|----------|----------------|------------------------------------------|
|     |         |         |     |     | refGene  | refGene        |                                          |
| 12  | 8072562 | 8072562 | A   | G   | UTR3     | na             | na                                       |
| 12  | 8073496 | 8073496 | T   | -   | UTR3     | na             | na                                       |
| 12  | 8074192 | 8074192 | G   | A   | exonic   | synonymous SNV | SLC2A3:NM_006931:exon10:c.C1308T:p.T436T |
| 12  | 8075117 | 8075117 | A   | G   | intronic | na             | na                                       |
| 12  | 8075286 | 8075286 | C   | T   | intronic | na             | na                                       |
| 12  | 8086062 | 8086062 | G   | C   | intronic | na             | na                                       |
| 12  | 8088766 | 8088766 | T   | C   | UTR5     | na             | na                                       |

**Table S8 SLC2A3 mutational status.**

Sequence alterations in *SLC2A3* gene, as assessed by Whole Exome Sequencing, in (i) MIA PaCa-2 and (ii) CAPAN-2 cell lines.

**Table S9**

| Time (hours) | MIA PaCa-2                                 |          |          |          |                                               |          |          |          | P value<br>shKMT2D#2-<br>21a+siSLC2A3<br>vs<br>shKMT2D#2-<br>21a+siC#1 |
|--------------|--------------------------------------------|----------|----------|----------|-----------------------------------------------|----------|----------|----------|------------------------------------------------------------------------|
|              | Cell Index<br>shKMT2D#2-21a+siC#1<br>(n=4) |          |          |          | Cell Index<br>shKMT2D#2-21a+siSLC2A3<br>(n=4) |          |          |          |                                                                        |
| 0            | 0                                          | 0        | 0        | 0        | 0                                             | 0        | 0        | 0        |                                                                        |
| 1.64611      | -0.09461                                   | -0.10544 | -0.10934 | -0.09085 | -0.06418                                      | -0.08382 | -0.1064  | -0.09298 | 0.2297                                                                 |
| 3.39611      | -0.07183                                   | -0.08472 | -0.08991 | -0.06829 | -0.04211                                      | -0.06424 | -0.08378 | -0.0497  | 0.12519                                                                |



|          |          |          |          |         |          |          |          |          |          |
|----------|----------|----------|----------|---------|----------|----------|----------|----------|----------|
| 4.89611  | -0.03959 | -0.05402 | -0.05856 | -0.0265 | -0.01929 | -0.04226 | -0.05887 | -0.01414 | 0.41835  |
| 6.64611  | -0.00333 | -0.02005 | -0.02692 | 0.00252 | -0.00723 | -0.02847 | -0.04887 | 0.00368  | 0.5636   |
| 8.14611  | 0.03037  | 0.01308  | 0.00741  | 0.02951 | 0.00352  | -0.01821 | -0.03962 | 0.0122   | 0.05644  |
| 9.89611  | 0.06093  | 0.03873  | 0.03554  | 0.05915 | 0.01221  | -0.00894 | -0.02679 | 0.02     | 0.00747  |
| 11.39611 | 0.08987  | 0.06699  | 0.06234  | 0.08699 | 0.02703  | 0.00411  | -0.0171  | 0.03304  | 0.00291  |
| 13.14611 | 0.11748  | 0.09022  | 0.08578  | 0.1108  | 0.03469  | 0.0146   | -0.00307 | 0.04192  | 8.19E-04 |
| 14.64611 | 0.14544  | 0.11846  | 0.11708  | 0.13531 | 0.04826  | 0.02964  | 0.0146   | 0.05787  | 2.46E-04 |
| 16.39611 | 0.17055  | 0.14461  | 0.13905  | 0.15488 | 0.06123  | 0.04342  | 0.03029  | 0.07208  | 1.29E-04 |
| 18.14611 | 0.19574  | 0.17415  | 0.1595   | 0.18154 | 0.07805  | 0.05888  | 0.04607  | 0.08932  | 1.09E-04 |
| 19.64611 | 0.21736  | 0.19735  | 0.17909  | 0.20363 | 0.09044  | 0.07096  | 0.05506  | 0.10093  | 8.85E-05 |
| 21.39611 | 0.24085  | 0.21538  | 0.20297  | 0.22107 | 0.1039   | 0.08493  | 0.06319  | 0.11479  | 8.77E-05 |
| 22.89611 | 0.26035  | 0.23619  | 0.21879  | 0.23155 | 0.10422  | 0.09528  | 0.07271  | 0.12445  | 5.91E-05 |
| 24.64611 | 0.28008  | 0.2552   | 0.23872  | 0.24416 | 0.11326  | 0.10717  | 0.08278  | 0.13412  | 4.69E-05 |
| 26.14611 | 0.29911  | 0.26855  | 0.2621   | 0.25453 | 0.12754  | 0.11606  | 0.09111  | 0.14491  | 5.39E-05 |
| 27.89611 | 0.32114  | 0.28338  | 0.27851  | 0.2651  | 0.14007  | 0.12484  | 0.09979  | 0.15369  | 8.00E-05 |
| 29.64444 | 0.34657  | 0.30347  | 0.2998   | 0.27632 | 0.15044  | 0.13389  | 0.11386  | 0.1615   | 8.82E-05 |
| 31.14444 | 0.35513  | 0.32492  | 0.3265   | 0.28211 | 0.16899  | 0.1474   | 0.13319  | 0.17644  | 9.34E-05 |
| 32.89444 | 0.38004  | 0.34996  | 0.34583  | 0.30357 | 0.18761  | 0.16214  | 0.15399  | 0.18929  | 7.82E-05 |
| 34.39444 | 0.42083  | 0.38988  | 0.37766  | 0.32976 | 0.21553  | 0.16931  | 0.17833  | 0.20924  | 1.50E-04 |
| 36.14444 | 0.451    | 0.42665  | 0.41102  | 0.34823 | 0.23936  | 0.18943  | 0.19445  | 0.23121  | 2.47E-04 |
| 37.64444 | 0.49111  | 0.46056  | 0.45351  | 0.38222 | 0.27224  | 0.21294  | 0.21425  | 0.25569  | 2.74E-04 |
| 39.39444 | 0.51728  | 0.4972   | 0.4868   | 0.40949 | 0.29648  | 0.23014  | 0.22787  | 0.27045  | 2.56E-04 |
| 40.89444 | 0.5545   | 0.52714  | 0.51567  | 0.43311 | 0.31419  | 0.24799  | 0.24713  | 0.29207  | 2.92E-04 |
| 42.64444 | 0.59323  | 0.54773  | 0.54368  | 0.44909 | 0.32836  | 0.26515  | 0.25549  | 0.30506  | 4.09E-04 |
| 44.39444 | 0.6212   | 0.58563  | 0.5737   | 0.4755  | 0.34719  | 0.28024  | 0.27408  | 0.31986  | 3.47E-04 |
| 45.89333 | 0.65597  | 0.62375  | 0.60767  | 0.48826 | 0.3702   | 0.28844  | 0.29087  | 0.3374   | 6.08E-04 |
| 47.64333 | 0.70713  | 0.67223  | 0.64871  | 0.51336 | 0.39095  | 0.2897   | 0.31313  | 0.36012  | 8.35E-04 |
| 49.14167 | 0.75288  | 0.71725  | 0.69244  | 0.53825 | 0.41959  | 0.31031  | 0.33353  | 0.38414  | 0.00108  |
| 50.88972 | 0.82426  | 0.77215  | 0.75003  | 0.57887 | 0.4602   | 0.33434  | 0.36341  | 0.41361  | 0.00133  |
| 52.38972 | 0.87652  | 0.83089  | 0.79804  | 0.61428 | 0.48923  | 0.35649  | 0.38867  | 0.44307  | 0.0014   |
| 54.13972 | 0.94527  | 0.89607  | 0.87458  | 0.66318 | 0.5208   | 0.38831  | 0.41366  | 0.4755   | 0.00124  |
| 55.88972 | 0.98306  | 0.96064  | 0.93668  | 0.70036 | 0.5501   | 0.41436  | 0.42933  | 0.49565  | 0.00114  |

|          |         |         |         |         |         |         |         |         |          |
|----------|---------|---------|---------|---------|---------|---------|---------|---------|----------|
| 57.38972 | 1.06    | 1.03367 | 1.00026 | 0.74032 | 0.58465 | 0.43986 | 0.44855 | 0.51596 | 0.00128  |
| 59.13972 | 1.12301 | 1.09276 | 1.07692 | 0.7769  | 0.60392 | 0.46201 | 0.46392 | 0.53602 | 0.00124  |
| 60.63972 | 1.20626 | 1.14633 | 1.13268 | 0.81675 | 0.63557 | 0.49094 | 0.48428 | 0.56445 | 0.00136  |
| 62.38972 | 1.28918 | 1.20455 | 1.18868 | 0.84646 | 0.65848 | 0.50778 | 0.50738 | 0.58652 | 0.0016   |
| 63.88972 | 1.37471 | 1.28074 | 1.27408 | 0.89532 | 0.69283 | 0.53255 | 0.53213 | 0.61546 | 0.00162  |
| 65.63972 | 1.44241 | 1.35446 | 1.32066 | 0.92819 | 0.72384 | 0.5516  | 0.55807 | 0.64672 | 0.00184  |
| 67.13972 | 1.54195 | 1.44198 | 1.41084 | 0.97504 | 0.76773 | 0.58073 | 0.59579 | 0.68441 | 0.0021   |
| 68.88972 | 1.62172 | 1.51839 | 1.47243 | 1.03179 | 0.80514 | 0.6037  | 0.62269 | 0.7066  | 0.0019   |
| 70.63972 | 1.72848 | 1.62262 | 1.55557 | 1.0837  | 0.85393 | 0.6376  | 0.65647 | 0.7417  | 0.00213  |
| 72.13972 | 1.80786 | 1.69168 | 1.62729 | 1.13608 | 0.89613 | 0.66294 | 0.68323 | 0.77687 | 0.0021   |
| 73.88972 | 1.88601 | 1.77459 | 1.70508 | 1.18451 | 0.93812 | 0.70083 | 0.71112 | 0.80651 | 0.00213  |
| 75.38972 | 1.9323  | 1.84716 | 1.77276 | 1.23341 | 0.97532 | 0.73422 | 0.73653 | 0.83511 | 0.00196  |
| 77.13944 | 2.00516 | 1.93677 | 1.84752 | 1.27405 | 1.02062 | 0.77242 | 0.75711 | 0.87031 | 0.00217  |
| 78.63944 | 2.0589  | 1.98732 | 1.91977 | 1.31567 | 1.05548 | 0.80312 | 0.77064 | 0.8978  | 0.00211  |
| 80.38944 | 2.1331  | 2.01494 | 2.02523 | 1.36859 | 1.08688 | 0.83444 | 0.80255 | 0.93638 | 0.00197  |
| 81.88944 | 2.1557  | 2.07281 | 2.05688 | 1.41857 | 1.11514 | 0.85874 | 0.822   | 0.96617 | 0.00168  |
| 83.63944 | 2.19256 | 2.13124 | 2.05782 | 1.47013 | 1.16515 | 0.89392 | 0.85701 | 1.00212 | 0.00158  |
| 85.38944 | 2.23593 | 2.17164 | 2.10071 | 1.5153  | 1.19504 | 0.9209  | 0.88714 | 1.03901 | 0.00147  |
| 86.88944 | 2.2729  | 2.1846  | 2.13259 | 1.577   | 1.23163 | 0.96151 | 0.92578 | 1.06566 | 0.00116  |
| 88.63944 | 2.27382 | 2.20528 | 2.13942 | 1.61148 | 1.26288 | 0.99543 | 0.95666 | 1.09706 | 0.00105  |
| 90.13944 | 2.27634 | 2.21071 | 2.12413 | 1.66209 | 1.30815 | 1.02607 | 0.99548 | 1.12739 | 8.67E-04 |
| 91.88944 | 2.26027 | 2.19989 | 2.13127 | 1.70817 | 1.34063 | 1.04828 | 1.02661 | 1.16042 | 6.55E-04 |
| 93.38944 | 2.22563 | 2.17577 | 2.08407 | 1.74883 | 1.3773  | 1.07453 | 1.05412 | 1.19905 | 5.11E-04 |
| 95.13944 | 2.1836  | 2.15322 | 2.07722 | 1.77086 | 1.38817 | 1.09131 | 1.07173 | 1.22476 | 3.82E-04 |
| 96.88944 | 2.13645 | 2.12463 | 1.99197 | 1.77793 | 1.42416 | 1.12489 | 1.09436 | 1.26069 | 4.36E-04 |

**Supplementary Table S9 Xcelligence Cell Index and *P* values of shKMT2D#2-21a+siSLC2A3 versus shKMT2D#2-21a+siC#1 MIA PaCa-2 cells.**

List of Cell Index values derived from the measured impedances and continuously displayed on the Xcelligence Software user interface. Each experimental condition was performed in triplicates. Statistical analyses were performed using one-way ANOVA and the *P* values

corresponding to the comparison of siRNA- transfected versus control cells are shown at every single time point. *P* values  $\leq 0.05$  are marked in red. Differences in Cell Index measurements are significant after 9.9 hours of monitoring.

**Table S10**

| CAPAN-2      |                                            |         |         |         |                                               |         |         |         |                                                                               |
|--------------|--------------------------------------------|---------|---------|---------|-----------------------------------------------|---------|---------|---------|-------------------------------------------------------------------------------|
| Time (hours) | Cell Index<br>shKMT2D#2-21a+siC#1<br>(n=4) |         |         |         | Cell Index<br>shKMT2D#2-21a+siSLC2A3<br>(n=4) |         |         |         | <i>P</i> value<br>shKMT2D#2-<br>21a+siSLC2A3<br>vs<br>shKMT2D#2-<br>21a+siC#1 |
| 0            | 0                                          | 0       | 0       | 0       | 0                                             | 0       | 0       | 0       | 0                                                                             |
| 1.64611      | -0.00518                                   | 0.02887 | 0.02781 | 0.05786 | 0.0328                                        | 0.05089 | 0.05253 | 0.08391 | 0.14817                                                                       |
| 3.39611      | 0.04612                                    | 0.07247 | 0.03966 | 0.09728 | 0.12267                                       | 0.11334 | 0.1014  | 0.14091 | 0.01182                                                                       |
| 4.89611      | 0.08429                                    | 0.10152 | 0.05783 | 0.13086 | 0.1671                                        | 0.14826 | 0.12715 | 0.16902 | 0.01723                                                                       |
| 6.64611      | 0.09141                                    | 0.12081 | 0.07221 | 0.15163 | 0.18629                                       | 0.1777  | 0.14465 | 0.19019 | 0.01749                                                                       |
| 8.14611      | 0.10227                                    | 0.13077 | 0.08522 | 0.16305 | 0.19681                                       | 0.19102 | 0.15491 | 0.19491 | 0.0175                                                                        |
| 9.89611      | 0.10822                                    | 0.14479 | 0.10014 | 0.17095 | 0.20304                                       | 0.19155 | 0.15909 | 0.20452 | 0.0243                                                                        |
| 11.39611     | 0.11602                                    | 0.14908 | 0.10879 | 0.18075 | 0.20815                                       | 0.19342 | 0.15649 | 0.20683 | 0.04243                                                                       |
| 13.14611     | 0.12673                                    | 0.15749 | 0.11432 | 0.19297 | 0.20311                                       | 0.19383 | 0.15725 | 0.20882 | 0.08766                                                                       |
| 14.64611     | 0.13734                                    | 0.16688 | 0.12238 | 0.20425 | 0.20318                                       | 0.1959  | 0.16033 | 0.20762 | 0.15637                                                                       |
| 16.39611     | 0.13679                                    | 0.1788  | 0.12986 | 0.21527 | 0.20663                                       | 0.19367 | 0.16094 | 0.20704 | 0.28                                                                          |
| 18.14611     | 0.13963                                    | 0.18715 | 0.13867 | 0.22552 | 0.20577                                       | 0.19182 | 0.15731 | 0.21143 | 0.46563                                                                       |
| 19.64611     | 0.13908                                    | 0.20014 | 0.15055 | 0.24238 | 0.20772                                       | 0.18509 | 0.15691 | 0.21236 | 0.79081                                                                       |
| 21.39611     | 0.15199                                    | 0.20827 | 0.16008 | 0.25841 | 0.21072                                       | 0.18474 | 0.15826 | 0.21277 | 0.91564                                                                       |
| 22.89611     | 0.16439                                    | 0.22046 | 0.16757 | 0.26948 | 0.20681                                       | 0.18091 | 0.15888 | 0.2217  | 0.65516                                                                       |
| 24.64611     | 0.17178                                    | 0.22879 | 0.17618 | 0.27906 | 0.21022                                       | 0.17862 | 0.15943 | 0.22131 | 0.4854                                                                        |
| 26.14611     | 0.18233                                    | 0.24194 | 0.18778 | 0.28877 | 0.20975                                       | 0.17247 | 0.16625 | 0.22506 | 0.31264                                                                       |
| 27.89611     | 0.19079                                    | 0.25002 | 0.19631 | 0.29901 | 0.21337                                       | 0.16567 | 0.16833 | 0.22944 | 0.23377                                                                       |
| 29.64444     | 0.19871                                    | 0.26096 | 0.20498 | 0.31507 | 0.21382                                       | 0.16072 | 0.16708 | 0.22533 | 0.14486                                                                       |
| 31.14444     | 0.20416                                    | 0.26983 | 0.20815 | 0.32568 | 0.2169                                        | 0.15077 | 0.17228 | 0.22927 | 0.13198                                                                       |
| 32.89444     | 0.21547                                    | 0.27794 | 0.21468 | 0.33238 | 0.21841                                       | 0.14868 | 0.17111 | 0.22952 | 0.09304                                                                       |

|          |         |         |         |         |         |         |         |         |            |
|----------|---------|---------|---------|---------|---------|---------|---------|---------|------------|
| 34.39444 | 0.2292  | 0.2868  | 0.22262 | 0.32484 | 0.22026 | 0.155   | 0.17275 | 0.22971 | 0.05689    |
| 36.14444 | 0.23987 | 0.29629 | 0.23187 | 0.32977 | 0.21612 | 0.153   | 0.17661 | 0.2296  | 0.03314    |
| 37.64444 | 0.25174 | 0.31045 | 0.24004 | 0.33863 | 0.21891 | 0.14798 | 0.16968 | 0.23424 | 0.02475    |
| 39.39444 | 0.25973 | 0.3197  | 0.24715 | 0.3491  | 0.21942 | 0.14642 | 0.17331 | 0.23079 | 0.01765    |
| 40.89444 | 0.27946 | 0.33161 | 0.25708 | 0.36537 | 0.21993 | 0.14594 | 0.17611 | 0.23741 | 0.01242    |
| 42.64444 | 0.29606 | 0.34571 | 0.26887 | 0.37698 | 0.22579 | 0.14306 | 0.17781 | 0.23661 | 0.00828    |
| 44.39444 | 0.30998 | 0.35912 | 0.28344 | 0.39855 | 0.22584 | 0.14444 | 0.1766  | 0.24021 | 0.00591    |
| 45.89333 | 0.32379 | 0.36613 | 0.29789 | 0.40662 | 0.23146 | 0.14379 | 0.1792  | 0.2435  | 0.00422    |
| 47.64333 | 0.34235 | 0.38699 | 0.31054 | 0.42459 | 0.23412 | 0.14304 | 0.17697 | 0.2435  | 0.00293    |
| 49.14167 | 0.36082 | 0.39765 | 0.32663 | 0.44115 | 0.23574 | 0.14884 | 0.18105 | 0.24735 | 0.00187    |
| 50.88972 | 0.37941 | 0.42018 | 0.34334 | 0.46218 | 0.2378  | 0.14949 | 0.18381 | 0.25057 | 0.00136    |
| 52.38972 | 0.39413 | 0.41995 | 0.36094 | 0.48011 | 0.24189 | 0.15193 | 0.18888 | 0.25398 | 0.00104    |
| 54.13972 | 0.41497 | 0.43158 | 0.37869 | 0.49187 | 0.24582 | 0.14865 | 0.19262 | 0.25755 | 7.32891E-4 |
| 55.88972 | 0.43311 | 0.44867 | 0.39118 | 0.50838 | 0.24916 | 0.15321 | 0.19742 | 0.2592  | 5.46944E-4 |
| 57.38972 | 0.45302 | 0.47498 | 0.41281 | 0.53264 | 0.25755 | 0.15661 | 0.19852 | 0.2666  | 4.56875E-4 |
| 59.13972 | 0.46446 | 0.49226 | 0.4216  | 0.54882 | 0.26464 | 0.15728 | 0.20195 | 0.26656 | 4.56939E-4 |
| 60.63972 | 0.47616 | 0.50906 | 0.44211 | 0.5688  | 0.26744 | 0.15994 | 0.20132 | 0.27022 | 3.60677E-4 |
| 62.38972 | 0.49577 | 0.53169 | 0.46098 | 0.59144 | 0.27397 | 0.15731 | 0.20344 | 0.27539 | 3.3748E-4  |
| 63.88972 | 0.50828 | 0.54829 | 0.47664 | 0.60875 | 0.27296 | 0.15572 | 0.20593 | 0.27813 | 2.84032E-4 |
| 65.63972 | 0.5195  | 0.56537 | 0.48394 | 0.63331 | 0.27788 | 0.15846 | 0.21138 | 0.28111 | 3.37041E-4 |
| 67.13972 | 0.53669 | 0.58838 | 0.49631 | 0.66112 | 0.2775  | 0.1593  | 0.21224 | 0.28775 | 3.56313E-4 |
| 68.88972 | 0.5662  | 0.61035 | 0.51694 | 0.69972 | 0.28775 | 0.15971 | 0.21376 | 0.28993 | 3.59497E-4 |
| 70.63972 | 0.584   | 0.62813 | 0.54239 | 0.73745 | 0.29622 | 0.16154 | 0.21927 | 0.29396 | 3.72348E-4 |
| 72.13972 | 0.59859 | 0.65662 | 0.56239 | 0.74433 | 0.30039 | 0.1621  | 0.22218 | 0.29927 | 2.69419E-4 |
| 73.88972 | 0.61695 | 0.68457 | 0.59003 | 0.79462 | 0.31094 | 0.16276 | 0.22757 | 0.29996 | 3.21261E-4 |
| 75.38972 | 0.64572 | 0.71715 | 0.62019 | 0.82155 | 0.31558 | 0.16979 | 0.22811 | 0.30751 | 2.27107E-4 |
| 77.13944 | 0.67032 | 0.75109 | 0.64926 | 0.87338 | 0.32503 | 0.16878 | 0.22842 | 0.30924 | 2.60778E-4 |
| 78.63944 | 0.70091 | 0.77414 | 0.68272 | 0.91828 | 0.33496 | 0.17422 | 0.23751 | 0.31654 | 2.47164E-4 |
| 80.38944 | 0.719   | 0.817   | 0.71987 | 0.96488 | 0.34224 | 0.1776  | 0.24023 | 0.32514 | 2.55432E-4 |
| 81.88944 | 0.73772 | 0.84741 | 0.76302 | 0.99968 | 0.35463 | 0.17843 | 0.24233 | 0.33096 | 2.3224E-4  |
| 83.63944 | 0.76381 | 0.88565 | 0.79464 | 1.03528 | 0.36315 | 0.18018 | 0.2539  | 0.33904 | 2.13786E-4 |
| 85.38944 | 0.79156 | 0.92192 | 0.84333 | 1.08365 | 0.37281 | 0.18552 | 0.25962 | 0.34019 | 1.86516E-4 |

|          |         |         |         |         |         |         |         |         |            |
|----------|---------|---------|---------|---------|---------|---------|---------|---------|------------|
| 86.88944 | 0.82089 | 0.95469 | 0.89068 | 1.14278 | 0.3834  | 0.18351 | 0.26606 | 0.34651 | 2.03876E-4 |
| 88.63944 | 0.86111 | 0.98606 | 0.93542 | 1.22052 | 0.39078 | 0.19116 | 0.27524 | 0.35727 | 2.36421E-4 |
| 90.13944 | 0.88858 | 1.02288 | 0.98232 | 1.2608  | 0.40177 | 0.19443 | 0.27683 | 0.36444 | 2.11559E-4 |
| 91.88944 | 0.92279 | 1.07905 | 1.0497  | 1.32095 | 0.40469 | 0.19637 | 0.28283 | 0.36852 | 1.79287E-4 |
| 93.38944 | 0.94733 | 1.12063 | 1.10369 | 1.37082 | 0.41868 | 0.19939 | 0.28276 | 0.37743 | 1.86388E-4 |
| 95.13944 | 0.98508 | 1.15215 | 1.17704 | 1.46032 | 0.43141 | 0.20711 | 0.28999 | 0.38536 | 2.29796E-4 |
| 96.88944 | 1.01497 | 1.19294 | 1.25461 | 1.51927 | 0.44505 | 0.21306 | 0.3005  | 0.39972 | 2.39577E-4 |

**Supplementary Table S10 Xcelligence Cell Index and *P* values of shKMT2D#2-21a+siSLC2A3 versus shKMT2D#2-21a+siC#1 CAPAN-2 cells.**

List of Cell Index values derived from the measured impedances and continuously displayed on the Xcelligence Software user interface. Each experimental condition was performed in triplicates. Statistical analyses were performed using one-way ANOVA and the *P* values corresponding to the comparison of siRNA- transfected versus control cells are shown at every single time point. *P* values  $\leq 0.05$  are marked in red. Differences in Cell Index measurements are significant after 36.1 hours of monitoring.

**Table S11**

| Top Networks                                                                              |       |
|-------------------------------------------------------------------------------------------|-------|
| ID Associated Network Functions Score                                                     | Score |
| Cell Cycle, Cell Death and Survival, RNA Post-Transcriptional Modification                | 47    |
| Cell Morphology, Connective Tissue Disorders, Developmental Disorder                      | 44    |
| Cellular Assembly and Organization, DNA Replication, Recombination and Repair, Cell Cycle | 43    |
| Cancer, Endocrine System Disorders, Nervous System Development and Function               | 39    |
| Lipid Metabolism, Small Molecule Biochemistry, Vitamin and Mineral Metabolism             | 36    |

**Supplementary Table S11 Bioinformatics prediction of the top networks regulated by KMT2D.**

The list of the top 5 networks derived from IPA GO algorithms for the KMT2D-regulated genes (Figure 3G). “Score” refers to the numerical value used to rank networks according to how relevant they are to the genes in the input dataset.

**Table S12**

| <b>Relative Hazard (Surv<sub>1</sub>/Surv<sub>2</sub>)</b> | <b>Median Survival Group 2</b> | <b>Total events needed</b> |
|------------------------------------------------------------|--------------------------------|----------------------------|
| .90 (1.11)                                                 | 667 (540)                      | 2828                       |
| .85 (1.18)                                                 | 706 (510)                      | 1189                       |
| .80 (1.25)                                                 | 750 (480)                      | 631                        |
| .75 (1.33)                                                 | 800 (450)                      | 379                        |
| .70 (1.43)                                                 | 857 (420)                      | 247                        |
| .67 (1.50)                                                 | 900 (400)                      | 191                        |
| .65 (1.54)                                                 | 923 (390)                      | 169                        |
| .60 (1.67)                                                 | 1000 (360)                     | 120                        |
| .57 (1.75)                                                 | 1050 (343)                     | 100                        |
| .55 (1.82)                                                 | 1090 (330)                     | 88                         |
| .50 (2.00)                                                 | 1200 (300)                     | 65                         |

**Table S12 Sample Size Calculations.**

2-tail test has been conducted by the Mayo Clinic Pancreatic Cancer SPORE Biostatistics Core, for sample size calculations (Cohort V). To correctly reject a false null hypothesis, critical values have been set as follows:  $\alpha$  .05, Power=.80, 50% allocation per group.

**Table S13**

| <b>KMT2D Expression</b>             | <b>Quartile 1<br/>(≤1.743)<br/>(N=54)</b> | <b>Quartile 2<br/>(&gt;1.743, ≤3.917)<br/>(N=55)</b> | <b>Quartile 3<br/>(&gt;3.917, ≤26.986)<br/>(N=55)</b> | <b>Quartile 4<br/>(&gt;26.986)<br/>(N=56)</b> | <b>P value</b> |
|-------------------------------------|-------------------------------------------|------------------------------------------------------|-------------------------------------------------------|-----------------------------------------------|----------------|
| <b>Age at Diagnosis</b>             |                                           |                                                      |                                                       |                                               | .7052          |
| N                                   | 41                                        | 45                                                   | 48                                                    | 54                                            |                |
| Mean (SD)                           | 64.78 (12.12)                             | 64.53 (11.48)                                        | 64.98 (12.61)                                         | 63.15 (10.51)                                 |                |
| Median                              | 67.00                                     | 66.00                                                | 64.50                                                 | 62.00                                         |                |
| Q1, Q3                              | 55.00, 75.00                              | 55.00, 74.00                                         | 53.50, 75.00                                          | 57.00, 72.00                                  |                |
| Range                               | (41.00-88.00)                             | (37.00-81.00)                                        | (41.00-89.00)                                         | (43.00-92.00)                                 |                |
| <b>Vital Status</b>                 |                                           |                                                      |                                                       |                                               | .2316          |
| Missing                             | 6                                         | 4                                                    | 4                                                     | 1                                             |                |
| Alive                               | 8 (16.7%)                                 | 6 (11.8%)                                            | 2 (3.9%)                                              | 6 (10.9%)                                     |                |
| Deceased                            | 40 (83.3%)                                | 45 (88.2%)                                           | 49 (96.1%)                                            | 49 (89.1%)                                    |                |
| <b>Survival (Days)</b>              |                                           |                                                      |                                                       |                                               |                |
| N                                   | 30                                        | 39                                                   | 39                                                    | 50                                            |                |
| Events                              | 25                                        | 35                                                   | 37                                                    | 44                                            |                |
| Median Survival Days                | 949.0 (588.0-1239.0)                      | 602.0 (413.0-874.0)                                  | 788.0 (409.0-1127.0)                                  | 565.0 (487.0-751.0)                           |                |
| 5 Yr Survival Rate                  | 19.1% (4.0%-34.2%)                        | 6.0% (0.0%-14.1%)                                    | 17.9% (5.9%-30.0%)                                    | 21.4% (9.6%-33.3%)                            |                |
| Year 5 N at Risk                    | 4                                         | 2                                                    | 7                                                     | 8                                             |                |
| <b>Sex</b>                          |                                           |                                                      |                                                       |                                               | .2540          |
| Missing                             | 6                                         | 4                                                    | 4                                                     | 1                                             |                |
| Female                              | 21 (43.8%)                                | 31 (60.8%)                                           | 24 (47.1%)                                            | 24 (43.6%)                                    |                |
| Male                                | 27 (56.3%)                                | 20 (39.2%)                                           | 27 (52.9%)                                            | 31 (56.4%)                                    |                |
| <b>Race</b>                         |                                           |                                                      |                                                       |                                               | .6593          |
| Missing                             | 9                                         | 5                                                    | 4                                                     | 1                                             |                |
| 1=American Indian/Alaskan Native    | 0 (0.0%)                                  | 0 (0.0%)                                             | 0 (0.0%)                                              | 1 (1.8%)                                      |                |
| 2=Asian/Asian-American              | 1 (2.2%)                                  | 1 (2.0%)                                             | 0 (0.0%)                                              | 0 (0.0%)                                      |                |
| 3=Black/African-American            | 0 (0.0%)                                  | 1 (2.0%)                                             | 0 (0.0%)                                              | 1 (1.8%)                                      |                |
| 5=White                             | 44 (97.8%)                                | 48 (96.0%)                                           | 51 (100.0%)                                           | 53 (96.4%)                                    |                |
| <b>Usual Adult BMI</b>              |                                           |                                                      |                                                       |                                               | .0252          |
| N                                   | 35                                        | 39                                                   | 44                                                    | 51                                            |                |
| Mean (SD)                           | 27.01 (5.12)                              | 27.59 (5.69)                                         | 30.21 (6.09)                                          | 29.67 (5.27)                                  |                |
| Median                              | 26.63                                     | 28.34                                                | 29.32                                                 | 28.80                                         |                |
| Q1, Q3                              | 24.24, 29.23                              | 23.81, 31.46                                         | 26.24, 32.03                                          | 25.06, 33.66                                  |                |
| Range                               | (15.31-43.72)                             | (16.46-38.80)                                        | (20.60-46.18)                                         | (18.88-43.02)                                 |                |
| <b>Usual Adult BMI (&lt;30,30+)</b> |                                           |                                                      |                                                       |                                               | .1108          |
| Missing                             | 19                                        | 16                                                   | 11                                                    | 5                                             |                |
| <30                                 | 28 (80.0%)                                | 27 (69.2%)                                           | 24 (54.5%)                                            | 32 (62.7%)                                    |                |
| 30+                                 | 7 (20.0%)                                 | 12 (30.8%)                                           | 20 (45.5%)                                            | 19 (37.3%)                                    |                |
| <b>Weight Loss</b>                  |                                           |                                                      |                                                       |                                               | .0060          |
| Missing                             | 6                                         | 4                                                    | 4                                                     | 1                                             |                |
| No                                  | 22 (45.8%)                                | 21 (41.2%)                                           | 11 (21.6%)                                            | 11 (20.0%)                                    |                |
| Yes                                 | 26 (54.2%)                                | 30 (58.8%)                                           | 40 (78.4%)                                            | 44 (80.0%)                                    |                |
| <b>Pounds Lost</b>                  |                                           |                                                      |                                                       |                                               | .0004          |
| N                                   | 48                                        | 51                                                   | 51                                                    | 55                                            |                |
| Mean (SD)                           | 8.63 (10.71)                              | 13.78 (15.62)                                        | 20.10 (19.31)                                         | 21.16 (17.58)                                 |                |

| <b>KMT2D Expression</b> | <b>Quartile 1</b><br>(≤1.743)<br>(N=54) | <b>Quartile 2</b><br>(>1.743, ≤3.917)<br>(N=55) | <b>Quartile 3</b><br>(>3.917, ≤26.986)<br>(N=55) | <b>Quartile 4</b><br>(>26.986)<br>(N=56) | <b>P value</b> |
|-------------------------|-----------------------------------------|-------------------------------------------------|--------------------------------------------------|------------------------------------------|----------------|
| Median                  | 5.00                                    | 11.00                                           | 15.00                                            | 20.00                                    |                |
| Q1, Q3                  | 0.00, 13.50                             | 0.00, 22.00                                     | 7.00, 30.00                                      | 10.00, 30.00                             |                |
| Range                   | (0.00-40.00)                            | (0.00-60.00)                                    | (0.00-85.00)                                     | (0.00-70.00)                             |                |
| <b>Stage at Surgery</b> |                                         |                                                 |                                                  |                                          | .7224          |
| Missing                 | 26                                      | 23                                              | 18                                               | 8                                        |                |
| IA                      | 0 (0.0%)                                | 0 (0.0%)                                        | 1 (2.7%)                                         | 0 (0.0%)                                 |                |
| IB                      | 3 (10.7%)                               | 3 (9.4%)                                        | 3 (8.1%)                                         | 3 (6.3%)                                 |                |
| IIA                     | 5 (17.9%)                               | 7 (21.9%)                                       | 13 (35.1%)                                       | 15 (31.3%)                               |                |
| IIB                     | 20 (71.4%)                              | 22 (68.8%)                                      | 20 (54.1%)                                       | 29 (60.4%)                               |                |
| IV                      | 0 (0.0%)                                | 0 (0.0%)                                        | 0 (0.0%)                                         | 1 (2.1%)                                 |                |

**Table S13 Quartile-based correlation of *KMT2D* expression with demographic and clinical characteristics of pancreatic cancer patients (Cohort V).**

Pancreatic carcinomas were subdivided in 2 groups: carcinomas with below median (<3.917) *KMT2D* expression and carcinomas with above median (>3.917) *KMT2D* expression. N: number of patients with clinical information; BMI: Body Mass Index.

Clinical correlations were examined using the SAS software.

**Table S14**

| <b>Primer</b>        | <b>Sequence</b>            | <b>Tm (°C)</b> |
|----------------------|----------------------------|----------------|
| <b>FASN Forward</b>  | CTT GGC CTT GGG TGT GTA CT | 57.4           |
| <b>FASN Reverse</b>  | CTG ATC ATC AAG AGC CAC CA | 54.6           |
| <b>KMT2D Forward</b> | ATG CAG CCA AGG ACC TAG AA | 56.4           |
| <b>KMT2D Reverse</b> | ATG CCT CGA TTC TGC TCT TC | 56             |
| <b>KDM8 Forward</b>  | TCA GTG CAG AGA GCC AGA GA | 54.1           |
| <b>KDM8 Reverse</b>  | ATC GGC CTC GTG TAA CAA GT | 55.9           |
| <b>KDM4C Forward</b> | TGG ATC CCA GAT AGC AAT GA | 53.1           |
| <b>KDM4C Reverse</b> | TGT CTT CAA ATC GCA TGT CA | 52.3           |
| <b>KDM2A Forward</b> | CCT CAG TGG CAT CAT CAA GA | 54.5           |
| <b>KDM2A Reverse</b> | TTT CAG TCC TGG CAG CCT AT | 56.1           |
| <b>KDM5B Forward</b> | CCT TGC CAA ATG GAA AG AAA | 51.5           |
| <b>KDM5B Reverse</b> | CTT CCC CAA GAG TTG CCA TA | 54.6           |
| <b>KMT2B Forward</b> | ACT TCG AGG ACA TGG AGG TG | 55.6           |
| <b>KMT2B Reverse</b> | GCG GCT ACA ATC TCT TCC TG | 55.6           |
| <b>KMT2C Forward</b> | GAA TCA CTT CCT GGG GTT GA | 54.5           |
| <b>KMT2C Reverse</b> | GGC AAG AGG AAG TTC CAT GA | 54.8           |
| <b>RELA Forward</b>  | CCA GAC CAA CAA CAA CCC CT | 57.6           |



|                             |                                   |      |
|-----------------------------|-----------------------------------|------|
| <b>RELA Reverse</b>         | <u>TCA CTC GGC AGA TCT TGA GC</u> | 57.0 |
| <b>SETD6 Forward</b>        | GCT TTC AGG AAC CAC TGG AG        | 55.8 |
| <b>SETD6 Reverse</b>        | GGC GTT GTG ATT GGC TAA GT        | 55.8 |
| <b>SLC2A3 Forward</b>       | TCC ACG CTC ATG ACT GTT TC        | 55.1 |
| <b>SLC2A3 Reverse</b>       | GCC TGG TCC AAT TTC AAA GA        | 53.3 |
| <b>SLC2A1 Forward</b>       | GTG GAG ACT AAG CCC TGT CG        | 57.3 |
| <b>SLC2A1 Reverse</b>       | CAT AGC CAC CTC CTG GGA TA        | 55.8 |
| <b>STK11 Exon 6 Forward</b> | TCG AAA TGA AGC TAC AAC ATC       | 50.7 |
| <b>STK11 Exon 6 Reverse</b> | TTT CAG CAG GTC AGA GAG           | 51.3 |
| <b>SUV420H1 Forward</b>     | TCA ACT GGT CGA GAT ACA GCA       | 55.6 |
| <b>SUV420H1 Reverse</b>     | CTC CAA AGA ACC CAT CTC CA        | 54.3 |
| <b>TSC1 Forward</b>         | <u>CTG GAG GAC TGC AGG AAC AT</u> | 56.9 |
| <b>TSC1 Reverse</b>         | <u>GAG CAG CAG CTC AGT GTG AC</u> | 58.5 |
| <b>β-actin Forward</b>      | CCC AGC ACA ATG AAG ATC AA        | 57.1 |
| <b>β-actin Reverse</b>      | ACA TCT GCT GGA AGG TGG AC        | 53.0 |
| <b>GAPDH Forward</b>        | ATG TTC GTC ATG GGT GTG AA        | 54.4 |
| <b>GAPDH Reverse</b>        | GGT GCT AAG CAG TTG GTG GT        | 57.9 |

### Supplementary Table S14 Primers used in qPCR analysis.

The list of all primer sequences used for real-time PCR analysis.

## 3. Supplementary Materials and Methods

### Cell Cultures and Treatments

Pancreatic cancer cell lines (MIA PaCa-2, PANC-1, CAPAN-1, CAPAN-2, AsPC-1, BxPC-3, HPAF-II and CFPAC-1) were purchased from ATCC. MIA PaCa-2 and PANC-1 were grown in DMEM, CAPAN-1 and CFPAC-1 in IMDM, CAPAN-2 in McCoy's 5A, AsPC-1 and BxPC-3 in RPMI 1640 (Gibco), HPAF-II in EMEM (ATCC), all supplemented with 10% FBS (Gemini Bioproducts). In the case of MIA PaCa-2, medium was also supplemented with 2.5% horse serum (Gibco). STR analysis has been performed as a method for human cell line authentication.

Pancreatic cancer cells were plated ( $2.5 \times 10^5$  cells in 35mm dishes) and after 24 h were treated with 1 or 2  $\mu\text{M}$  of 5-AZA-CdR (A3656, Sigma-Aldrich). Cells were incubated for 0 to 4 days before DNA, RNA or protein extraction.

Around 80% confluent MIA PaCa-2 cells were pretreated with 100 nM rapamycin (#1292, TOCRIS) for 24 h. Cell lysates were analyzed by IB analysis.

KMT2D-silenced MIA PaCa-2 cells were treated with the inhibitors of NF- $\kappa$ B activation, Tanshinone IIA (4426) and RO 106-9920 (1778) purchased from TOCRIS, for 24 h before RNA extraction.

MIA PaCa-2 cells were plated in 96-well dishes ( $1 \times 10^3$  cells/well) and treated with a) different doses of lipids including: cis-13,16-Docosadienoic (Hebei Zhongzhuo Import and Export Trade Co, Ltd), 13Z,16Z,19Z-Docosatrienoic (SC-200782, Santa Cruz Biotechnology, Inc) or 4,10,13,16-Docosatetraenoic acid (D3659, Sigma-Aldrich) and b) the lipid synthesis inhibitors SC 26196 (4189, TOCRIS) and SB 204990 (4962, TOCRIS). Cells were incubated for 1, 3 or 5 days before measurement of cell viability and for 3 days before performing *in vitro* invasion assays.

### **Real-Time PCR Analysis**

RNA purified from cells and tissues with TRIZOL (Life Technologies) was reverse-transcribed to form cDNA using the iSCRIPT RT Supermix (Bio-Rad), which was subjected to real-time PCR analysis using the iQ SYBR Green Supermix (Bio-Rad) on a CFX384 Touch Real-Time PCR Detection System (Bio-Rad). The primer sequences used for real-time PCR were acquired from previous studies [3] or designed using the NCBI Nucleotide Database (<http://www.ncbi.nlm.nih.gov/nucleotide>), Primer3 v.0.4.0

(<http://bioinfo.ut.ee/primer3-0.4.0>) and UCSC In-Silico PCR (<http://genome.ucsc.edu/cgi-bin/hgPcr>) and are included in Table S14. Gene expression levels were normalized to the levels of GAPDH and  $\beta$ -actin. Normalized gene expression levels were quantified to the respective control. Bars represent means  $\pm$  SE; experiments were performed in quadruplicates for each condition.

For Kaplan-Meier studies in patients' Cohort V, transcript expression for human KMT2D was determined using PerfeCTa SYBR Green FastMix (Quanta BioSciences Inc., Gaithersburg, MD) and the following primer sets: KMT2D, 5'-AACCATATCGGCCTGGCATT -3' (forward) and 5'-CAGCAGGTATCACCTCGTCG -3' (reverse); 18S, 5'-AACCCGTTGAACCCCATTCGTGAT -3' (forward) and 5'-AGTCAAGTTCGACCGTCTTCTCAG -3' (reverse). 500 ng RNA was reverse transcribed using High Capacity cDNA synthesis kit (Applied Biosystems). 10 ng cDNA from each sample was used for qPCR analysis. Amplification was performed using the C1000 Thermal Cycler (Bio-Rad). RNA levels were normalized by comparison with the corresponding housekeeping RNA level in the same sample. The results are calculated following the  $2^{-\Delta C_t}$  (where  $\Delta C_t$  represents the difference in threshold cycles between the target and control gene).

### **Whole Exome Sequencing**

Genomic DNA was isolated from human MIA PaCa-2 and CAPAN-2 pancreatic cancer cell lines using QIAamp DNA Mini Kit (51304) and used for Whole Exome Sequencing that was conducted at the UCLA Clinical Microarray Core. The library construction was performed using the SeqCap EZ System from NimbleGen according to the

manufacturer's instructions. Briefly, genomic DNA was sheared, size selected to roughly 300 base pairs, and the ends were repaired and ligated to specific adapters and multiplexing indexes. Fragments were then incubated with SeqCap biotinylated DNA baits after LM-PCR and the hybrids were purified using streptavidin-coated magnetic beads. After amplification of 18 or less PCR cycles, the libraries were then sequenced on the HiSeq 3000 platform from Illumina, using 100-bp pair-ended reads. The sequence data were aligned to the GRCh37 human reference genome using BWA v0.7.7-r411. PCR duplicates were marked using MarkDuplicates program in Picard-tools-1.115 tool set. GATK v3.2-2 was used for INDEL (insertions and deletions) realignment and base quality recalibration. Exome coverage was calculated using the bedtools. Samtools was used to call the SNVs (single nucleotide variants) and small INDELS. VarScan2 was used to call the somatic SNVs. All variants were annotated using the Annovar program.

### **Immunoblot Analysis**

Total cell extracts were separated by SDS-PAGE and transferred to PVDF membranes following standard procedures. Frozen tissue biopsies were homogenized using RIPA buffer (Cell Signaling Technology), followed by sonication. In the case of KMT2D, protein levels were monitored by 5% SDS-PAGE using modified long apparatus for extended running time. Transfer time reached 24 h at 4<sup>0</sup>C and the buffering system contained 15% methanol. The following antibodies were used for immunoblot analysis: KMT2D (R0118-1, Abiocode), mono-methyl-Histone H3 (Lys4) (5326), di-methyl-Histone H3 (9725), tri-methyl-Histone H3 (Lys4) (9751), Histone H3 (14269), FASN

(3180), phospho-mTOR (Ser2448) (5536), mTOR (2983), RICTOR (2114), phospho-NF- $\kappa$ B p65 (Ser536) (3033), NF- $\kappa$ B p65 (8242), CREB (9104) (Cell Signaling Technology). The protein levels that corresponded to the immunoreactive bands were quantified using the Scion Image analysis software (Scion Corp., Frederick, MD).

### **Cell Viability Assay**

MIA PaCa-2 cells were plated in quadruplicates and treated with exogenously added lipids in 96-well plate ( $1 \times 10^3$  cells/well) and cell growth was assessed 1, 3 or 5 days later using the CellTiter Glo Luminescence Cell Viability Assay (Promega). Data are expressed as mean fluorescence (arbitrary units)  $\pm$  S.D.

### **Anchorage-Independent Cell Growth Assay**

Triplicate samples of  $25 \times 10^3$  MIA PaCa-2 cells from each treatment were assayed in 48-well plates for colony formation using the CytoSelect Cell Transformation kit (Cell Biolabs, Inc). Colorimetric quantitation of colonies has been performed according to the manufacturer's instructions. Data were expressed  $\pm$  SE of the mean of at least 2 independent experiments.

### **Invasion assay**

Invasion in matrigel has been conducted by using standardized conditions with BD BioCoat Matrigel invasion chambers (354480; BD Biosciences) according to the manufacturer's protocol. Assays for MIA PaCa-2 cells were conducted using 10% FBS-containing media as chemoattractant. Noninvading cells on the top side of the

membrane were removed, whereas invading cells were fixed and stained with .1% crystal violet, 22 h after seeding. The cells that migrated through the filter were quantified by counting the entire area of each filter divided in four fields, using a grid and an Evos microscope at a X20 magnification. Data are expressed as the mean number of invading cells per field  $\pm$  SD.

### **Dynamic Monitoring of Cell Proliferation**

Real-time cell proliferation analysis based on the application of electrical cell substrate impedance changes ([https://lifescience.roche.com/wcsstore/RASCatalogAssetStore/Articles/BIOCHEMICA\\_4\\_08\\_p14-16.pdf](https://lifescience.roche.com/wcsstore/RASCatalogAssetStore/Articles/BIOCHEMICA_4_08_p14-16.pdf)) was performed using the xCELLigence RTCA instrument (ACEA Biosciences). The presence of cells affects the local ionic environment at the electrode solution interface. Cell status is represented by a dimensionless parameter termed Cell Index, which is derived as the relative change in measured electrical impedance, after subtraction of the background measurements from media alone. Local ionic environment varies according to cell size, cell morphology and strength of adhesion of the cells to the surface of the electrode, resulting in changes of the electrode impedance.  $5 \times 10^3$  cells were seeded in quadruplicates of an E-Plate 96 with interdigitated microelectrode arrays integrated in the bottom of each well. Subsequently, the E-Plate 96 was mounted on the SP Station of the xCELLigence RTCA system which is placed in a standard temperature-controlled CO<sub>2</sub> incubator under humidity saturation. The RTCA Software preinstalled on the RTCA control unit allows automatic selection of wells for measurement and real-time data acquisition within preprogrammed 15 min

time intervals. Bars represent means  $\pm$  SD; experiments were performed in quadruplicates for each condition.

### **Immunohistochemistry and Digital Pathology Analysis**

For immunohistochemical analysis of KMT2D in matched normal and cancer human tissues, deparaffinized 5- $\mu$ m sections were incubated sequentially in accordance with the instructions of the LSAB kit (DAKO Corporation). For digital automated morphometry, the immunohistochemically stained sections were digitized at 40x magnification using an Aperio Scanscope CS (Aperio). The final immunohistochemical score was calculated from a combination of the intensity and percentage scores [4]. Antigen retrieval was performed by incubating the slides in boiling .01% sodium citrate pH 6.0 for 5 min. The endogenous peroxidase activity was inhibited by immersing the slides in 3% H<sub>2</sub>O<sub>2</sub>-methanol for 25 min and the background nonspecific binding was reduced by incubating with 1% BSA in PBS for 60 min. The slides were incubated overnight with antibody against KMT2D (1:200) (HPA035977, Sigma-Aldrich). In order to reduce the variability, all samples from each group were processed at the same time in a single experiment using a single batch of diluted antibody. The slides were then washed 5 times in PBS, followed by sequential incubations with biotinylated secondary antibody for 30 min at RT, streptavidin-HRP conjugate for 30 min at RT and 3,3'-diaminobenzidine tetra-hydrochloride (liquid DAB) for 3 min in the dark. The reaction was arrested with distilled water and the slides were counterstained with hematoxylin. Thereafter, the tissues were washed in tap water for 5 min, dehydrated through ethanol

baths (70, 90 and 100%) and xylene. Slides were finally mounted with E-2 Mount medium (Shandon lab).

The Aperio Scanscope CS obtains 40X images with a spatial resolution of 0.45  $\mu\text{m}/\text{pixels}$ . The images were reviewed using an ImageScope (Aperio). Once the areas were recorded (500  $\mu\text{m}$  for each tissue), they were sent for automated image analysis using the Spectrum Software V11.1.2.752 (Aperio). For the within tissue intensity, an algorithm was developed to quantify the total or nuclear protein expression. The output from the algorithm gives a number of quantitative measurements, namely the intensity, concentration and percentage of positive staining. The quantitative scales for the intensity and percentage were categorized into 4 and 5 classes, respectively, after the cut-off values were determined. The staining intensity was categorized as 0 (no staining), 2+ (moderate) and 3+ (strong).

All other immunostainings of formalin fixed paraffin embedded (FFPE) sections have been performed by the Translational Pathology Core Laboratory, UCLA. The endogenous peroxidase activity was blocked with 3% hydrogen peroxide in methanol for 10 min. Heat-induced antigen retrieval was carried out for all sections in .01M Citrate buffer, pH=6.0 by using a Biocare decloaker at 95°C for 25 min. The slides were incubated for 1h with antibodies against KMT2D (1:200) (HPA035977, Sigma-Aldrich), SLC2A3 (1:100) (20403-1-AP, Proteintech), phosphorylated NF- $\kappa$ B p65 (536) (1:100) (ab86299, Abcam) and Ki-67 (1:100) (M7240, Agilent). The signal was detected using Mach3 rabbit, HRP conjugated polymer for 30 min (Biocare Medical) and visualized with the diaminobenzidine reaction. Images were further captured with an Axio Imager.Z1 upright microscope (Carl-Zeiss).



## HM450 Methylation array

For global methylation profiling, the Illumina Infinium HumanMethylation450 (HM450) BeadChIP has been used (Illumina, San Diego, CA). Bisulfite conversion has been performed on 1  $\mu$ g of genomic DNA from each sample using the EZ-96 DNA Methylation Kit (Zymo Research, Irvine, CA) according to the manufacturer's instructions. Bisulfite-converted DNA was whole genome amplified and enzymatically fragmented prior to hybridization to BeadChIP arrays. The oligomer probe designs of HM450 arrays follow the Infinium I and II chemistries, in which locus-specific base extension follows hybridization to a methylation-specific oligomer. The level of DNA methylation at each CpG locus was scored as beta ( $\beta$ ) value calculated as  $(M/(M+U))$ , ranging from 0 to 1, with 0 indicating no DNA methylation and 1 indicating fully methylated DNA. The data were extracted using Illumina Genome Studio Methylation Module and quantile normalized using 'preprocesscore' R package (<https://cran.r-project.org/>). Of the 485,577 CpG probes on the array, we filtered out probes with high detection  $P$  values, probes with a SNP within 10 base pairs of the target CpG [5] and repeat regions and probes on X and Y chromosomes, leaving 371,478 probes. The term 'hyper-methylation' was used when there was an increased DNA methylation in patients compared to controls and, the term 'hypo-methylation' was used when we observed a decreased DNA methylation in patients compared to controls.

For statistical and bioinformatics analyses, Wilcoxon rank-sum tests were conducted to compare methylation array data between pancreatic cancer patients and healthy controls. Magnitude of DNA methylation changes was assessed using methylation beta values. Correction for multiple comparisons was performed using FDR (Benjamini-

Hochberg) approach. A corrected  $P$  value, denoted as, ' $q$ ' $\leq$ .05 was considered significant. The mean difference in betas, associated  $P$  and  $q$  values for chromatin modifiers are presented in Table EV1.

### **Targeted Bisulfite Sequencing and Data Analysis**

Next-generation sequencing for the evaluation of DNA methylation at single-nucleotide resolution has been conducted by Zymo Research Corporation, Irvine, CA. Assays were designed targeting CpG sites in the specified ROI using primers created with Rosefinch, Zymo Research's proprietary sodium bisulfite converted DNA-specific primer design tool. The primer sequences used are as follows: (Forward: TTTAGTTTATGTTTTTGTGTTAGGATTAGAA, Reverse: AATAAACATATAAATCTCTTTCTTAACACCAA). Sequence reads were aligned back to the reference genome using Bismark (<http://www.bioinformatics.babraham.ac.uk/projects/bismark/>), an aligner optimized for bisulfite sequence data and methylation calling (Krueger & Andrews, 2011). The methylation level of each sampled cytosine was estimated as the number of reads reporting a C, divided by the total number of reads reporting a C or T. Following primer validation, provided samples were bisulfite converted using the EZ DNA Methylation-Lightning™ Kit (D5030, Zymo Research) according to the manufacturer's instructions. Multiplex amplification of all samples using ROI specific primer pair and the Fluidigm Access Array™ System was performed according to the manufacturer's instructions. The resulting amplicons were pooled for harvesting and subsequent barcoding according to the Fluidigm instrument's guidelines. After barcoding, samples

were purified using ZR-96 DNA Clean & Concentrator™-5 (D4023, Zymo Research) and then prepared for massively parallel sequencing using a MiSeq V2 300bp Reagent Kit and paired-end sequencing protocol according to the manufacturer's guidelines. Sequence reads were identified using standard Illumina base-calling software and then analyzed using a Zymo Research proprietary analysis pipeline. Low quality nucleotides and adapter sequences were trimmed off during analysis QC. Paired-end alignment was used as default. Index files were constructed using the *bismark\_genome\_preparation* command and the entire reference genome. The *--non\_directional* parameter was applied while running Bismark. All other parameters were set to default. Nucleotides in primers were trimmed off from amplicons during methylation calling.

### **Plasmid Construction and *in vitro* Methylation**

Linear 300 bp DNA fragments between nt: -179 and +122 relatively to the transcription start site in the human *KMT2D* genomic region were constructed by Genewiz either in the wild type form (unmodified), or modified by a C to A mutation at CpG sites -29 (Mut 1) or +145 (Mut 2) or both (double Mut). Artificial SacI and HindIII restriction sites have been incorporated using Native Taq Polymerase (18038-018, Life Technologies) and the following primers: sense, 5'-GTAGATCAGAGCTCACTTTCTTG-3'; antisense, 5'-CTAGTCATAAGCTTTCCTTGTGC- 3'. The resulting PCR products were subsequently cloned into the pCR 2.1-TOPO vector (450641, Life Technologies) using the TOPO TA cloning kit (Life Technologies). The pCR 2.1 TOPO plasmids containing the *KMT2D* genomic inserts (hereafter referred to as TOPO*KMT2D*) were linearized with SacI

(R3156M, New England Biolabs) and *in vitro* methylated using SssI methylase (M0226L, New England Biolabs), which nonspecifically methylates all CpG dinucleotides. The efficiency of *in vitro* methylation was confirmed by resistance to cleavage by the methylation-sensitive restriction enzyme HpaII (R0171L, New England Biolabs) that has recognition site(s) in the analyzed regions and no sites within the sequence of pCR 2.1 TOPO vector. The linearized methylated and unmethylated TOPO*KMT2D* vectors were then digested with HindIII (R3104T, New England Biolabs) to excise the *KMT2D* inserts. After fractionation on a 1.8 % agarose gel, the DNA bands corresponding to 300 bp were cut from the gel, isolated using NucleoSpin® Gel and PCR Clean-up columns (Macherey-Nagel). To determine whether global or site-specific CpG methylation of the *KMT2D* genomic region affected gene expression in a reporter gene construct, the methylated and unmethylated control fragments were then ligated into the pGL4.82 [hRluc/Puro] Vector (E750A, Promega) between the SacI and HindIII restriction sites. The pGL4.82 [hRluc/Puro] plasmid is designed for high expression and reduced anomalous transcription. The vector encodes the luciferase reporter gene *hRluc* but lacks eukaryotic promoter and enhancer sequences. T4 DNA Ligase (M0202S, New England Biolabs) was used to perform the ligation reaction according to the manufacturer's instructions, at 1:3 vector to insert ratio. The efficiency of ligation and equivalence of incorporated DNA into the methylated and unmethylated constructs were confirmed by agarose gel electrophoresis. For further validation, DNA sequence analysis across the multiple cloning site region located upstream of the *hRluc* gene was performed using RVprimer3 clockwise primer (E448A, Promega) by Genewiz. The effect of total methylation on the transcriptional activity of the inserted *KMT2D*

fragments was expressed as the relative change in reporter gene activity. Data were presented as the mean of Luminescence Units  $\pm$  SE of 3 independent experiments performed in triplicates.

### **Chromatin Immunoprecipitation, Sequencing and Analysis**

Chromatin immunoprecipitation was carried out using the SimpleChIP Plus Enzymatic Chromatin IP Kit (Cell Signaling Technology). Briefly, the chromatin fragments, derived from siC#1, siKMT2D#1 and siKMT2D#2 treated cells, were immunoprecipitated with antibody against tri-methyl-Histone H3 (Lys4) (9751, Cell Signaling Technology) at a ratio 1:50 or 1:100, respectively. After purification, libraries for next generation sequencing were prepared using NEBNext® ChIP-seq Library Prep Master Mix Set for Illumina® (E6240, New England BioLabs) and further analyzed using Illumina NextSeq500 system (single-end 75bp protocol). Both ChIP-seq and Bioinformatics Analyses were performed by the Center for Cancer Computational Biology, Dana-Farber Cancer Institute, Boston, MA. Sequencing reads in fastq-format were aligned to the UCSC hg19 reference genome using BWA (version 0.7.9a bwa mem with default options). Duplicate reads were removed with Picard tools (v. 1.115) MarkDuplicates and were filtered to retain only primary alignments with samtools (v0.1.19, view command with -F 0x100 flag). ChIP-seq peaks were called using HOMER (v4.7) findPeaks by selecting matched input samples with default settings (Poisson  $P$  value of  $\leq 1E-4$  and fold change  $\geq 4.0$ ). Histone option was employed. Further, peaks were annotated using HOMER's annotatePeaks utility using the hg19 annotations database provided with the software. Analysis of differentially bound peaks was performed using HOMER's

getDifferentialPeaks command, which examines the distributions of reads to determine enrichment in a particular condition (Poisson  $P$  value  $<1E-4$ , fold-change  $\geq 4.0$ ), suggesting a differentially bound peak. Plots of the distribution of distances to the annotated transcription start site were created directly from the annotated peak data provided as output by HOMER. Similar approach was applied for the pie charts representing the distribution of annotated peak features. Enrichment plots were constructed by comparing the read density (number of reads divided by the length of the peak region) in each of the experimental conditions for each set of peak regions. Read densities were found in both siC#1 and siKMT2D conditions for all peak regions in the siKMT2D condition; enrichment values were calculated as the scaled difference between the densities. The increase in H3K4me3 read density (comparing siKMT2D to siC#1) was tested with a one-sided Wilcoxon signed-rank test ( $P < .001$ ). Similarly, enrichment values were calculated in both conditions for the peak regions found in siC#1 condition ( $P < .001$ ).

### **Luciferase Assay**

MIA PaCa-2 cells were transfected with the untreated or CpG MSssl-treated *KMT2D/hRluc* constructs and the pGL4.51 [luc2/CMV/Neo] (E1320, Promega) containing synthetic firefly luciferase *luc2* gene. 48 h later luciferase activity was measured using the Dual Luciferase Reporter Assay System (E1960, Promega). Data were expressed  $\pm$  SE of the mean of 3 independent experiments.

In order to assess whether *STK11* represents a direct transcriptional KMT2D target, MIA PaCa-2 cells were transfected with the LightSwitch RenSP reporter vector carrying

human STK11 promoter (S714439, SwitchGear Genomics) and the pLenti CMV Puro LUC (w168-1) (17477, Addgene) containing Luc reporter gene. At 24 h, the cells were transfected with siC#1 or siKMT2D#2 and 48 h later luciferase activity was measured using the Dual Luciferase Reporter Assay System (Promega). Data were expressed  $\pm$  SE of the mean of 3 independent experiments.

### **Metabolic Profiling**

Cellular metabolic rates were measured using a XF24-3 Analyzer (Seahorse Biosciences) by the Cellular Bioenergetics Core, UCLA. Cells were plated as a confluent monolayer in the Seahorse plate and left undisturbed for 24 h. Bioenergetic parameters were obtained in basal and after sequential injection of an ATPase inhibitor oligomycin (oligo), a mitochondrial uncoupler (FCCP) and mitochondrial inhibitors rotenone and myxothiazol (RM) in pancreatic cancer cells. Bars represent means  $\pm$  SD; experiments were performed in quadruplicates for each condition.

Lipids extraction from a) human cancer cells b) tumor tissues from mice bearing human pancreatic cancer xenografts and c) human biopsies, reconstitution in the solvent system suitable for analysis and quantitative evaluation of altered lipid profiles by LC-MS analysis were performed by the Lipidomics Core Facility, Wayne State University. Lipid classes currently analyzed: FAs and total cholesterol. Bars represent means  $\pm$  SD; experiments were performed in triplicates for each condition.

### **NADP/NADPH-Glo™ Assay**

The bioluminescent homogeneous NADP/NADPH-Glo™ Assay (G9081, Promega) was used for detecting total reduced nicotinamide adenine dinucleotides phosphates (NADPH) in cells pretreated with siC#1, siKMT2D#1 or siKMT2D#2, following the manufacturer's protocol. Bars represent means  $\pm$  SD; experiments were performed in triplicates for each condition.

### **Lactate Assay**

The Lactate Assay Kit (MAK064, Sigma) was used to determine the lactate production in cells pretreated with siC#1, siKMT2D#1 or siKMT2D#2 based on an enzymatic assay, which results in a colorimetric (570 nm) product, proportional to the lactate present, according to manufacturer's instructions. Bars represent means  $\pm$  SD; experiments were performed in triplicates for each condition.

### **Glucose Uptake Assay**

The Glucose Uptake Assay Kit (MAK083, Sigma) was used to determine the glucose uptake in cells pretreated with siC#1, siKMT2D#1 or siKMT2D#, according to manufacturer's instructions. The glucose analogue, 2-deoxyglucose (2-DG) used, is taken up by cells and phosphorylated by hexokinase to 2-DG6P. 2-DG6P cannot be further metabolized and accumulates in cells, directly proportional to the glucose uptake by cells. Briefly, 2-DG uptake is determined by a coupled enzymatic assay in which the 2-DG6P is oxidized, resulting in the generation of NADPH, which is then determined by a recycling amplification reaction in which the NADPH is utilized by glutathione



reductase in a coupled enzymatic reaction that produces glutathione. Glutathione reacts with DTNB to colorimetric product TNB, which is detected at 412 nm. Bars represent means  $\pm$  SD; experiments were performed in triplicates for each condition.

### **Cholesterol Uptake Cell-based Assay**

Cholesterol Uptake Cell-based Assay Kit (Cayman Chemical) was used to study cellular cholesterol trafficking, following the manufacturer's protocol. Cells were treated with siC#1 or siKMT2D#2 in culture medium containing 20  $\mu$ g/ml NBD Cholesterol and incubated for 72 h. Detection of cholesterol uptake was assessed by fluorescence microscopy using Axio Observer.D1 inverted microscope (Carl-Zeiss).

### **Patient Samples**

RNA and DNA were extracted from 'normal' (adjacent non-tumoral) and PDAC tissues using TRIZOL (Life Technologies) and (QIAamp DNA Mini Kit, Qiagen), respectively. Samples originating from Cohort I were used for Gene expression profiling that was conducted at the UCLA Clinical Microarray Core, while DNA methylation analysis using Infinium HumanMethylation450 BeadChIP assay has been performed at the Translational Genomics Core, Cambridge, MA. For validation of the Gene expression array data, tissues originating from Cohorts II and III were subjected to RT-qPCR analysis., while FFPE tissues (Cohort IV) were subjected to immunohistochemical analysis. For correlation of *KMT2D* expression with overall patient survival, human pancreatic tumors (Cohort V) were approved by the institutional review boards of Mayo

School of Medicine and informed consent was obtained from all patients prior to tissue procurement and subsequent analysis.

## Statistical Analyses

Quantitative data were expressed as means  $\pm$  SD or SE of the mean, as indicated, or as boxes and whiskers (minimum-to-maximum), using Origin 9.1 Software. Statistical analyses were performed using one-way ANOVA or Pearson correlation. P values of  $<.05$  were considered statistically significant.

Clinical correlations were examined using the SAS software. The Kaplan-Meier test was used for univariate survival analysis. The Cox proportional hazard model was used for multivariate analysis and for determining the 95% confidence interval.

## 4. Supplementary References

1. Badea L, Herlea V, Dima SO, Dumitrascu T, Popescu I. Combined gene expression analysis of whole-tissue and microdissected pancreatic ductal adenocarcinoma identifies genes specifically overexpressed in tumor epithelia. *Hepato-gastroenterology* 2008;**55**(88):2016-27
2. Segara D, Biankin AV, Kench JG, et al. Expression of HOXB2, a retinoic acid signaling target in pancreatic cancer and pancreatic intraepithelial neoplasia. *Clinical cancer research : an official journal of the American Association for Cancer Research* 2005;**11**(9):3587-96 doi: 10.1158/1078-0432.ccr-04-1813[published Online First: Epub Date]].
3. Vorvis C, Hatziaepostolou M, Mahurkar-Joshi S, et al. Transcriptomic and CRISPR/Cas9 technologies reveal FOXA2 as a tumor suppressor gene in pancreatic cancer. *American journal of physiology. Gastrointestinal and liver physiology* 2016;**310**(11):G1124-37 doi: 10.1152/ajpgi.00035.2016[published Online First: Epub Date]].
4. Kim BW, Cho H, Chung JY, et al. Prognostic assessment of hypoxia and metabolic markers in cervical cancer using automated digital image analysis of immunohistochemistry. *Journal of translational medicine* 2013;**11**:185 doi: 10.1186/1479-5876-11-185[published Online First: Epub Date]].
5. Noushmehr H, Weisenberger DJ, Diefes K, et al. Identification of a CpG island methylator phenotype that defines a distinct subgroup of glioma. *Cancer cell* 2010;**17**(5):510-22 doi: 10.1016/j.ccr.2010.03.017[published Online First: Epub Date]].
